# Supplementary material
Source: PubMed Central journal article supplement (PMC5731244)
Supplement: NIHMS921574-supplement-Supplement1.pdf [file NIHMS921574-supplement-Supplement1.pdf]

## Supplementary Appendix

This appendix has been provided by the authors to give readers additional information about their work.

Supplement to: Marso SP, McGuire DK, Zinman B, et al. Efficacy and safety of degludec versus glargine in type 2 diabetes. *N Engl J Med* 2017;376:723-32. DOI: [10.1056/NEJMoa1615692](https://doi.org/10.1056/NEJMoa1615692)

## Contents

|                                                                                                                                                        |    |
|--------------------------------------------------------------------------------------------------------------------------------------------------------|----|
| DEVOTE Committee members and Investigators .....                                                                                                       | 2  |
| Inclusion and exclusion criteria .....                                                                                                                 | 38 |
| Clinical event definitions.....                                                                                                                        | 39 |
| Interim analysis data access management plan .....                                                                                                     | 45 |
| Rationale for the 1.3 and 1.8 thresholds .....                                                                                                         | 46 |
| Figure S1: Trial design .....                                                                                                                          | 47 |
| Figure S2: Patient disposition .....                                                                                                                   | 48 |
| Figure S3: Major adverse cardiovascular event sensitivity analyses.....                                                                                | 49 |
| Figure S4: Major adverse cardiovascular events subgroup analyses .....                                                                                 | 50 |
| Figure S5: Time to first Event Adjudication Committee-confirmed 4-point major adverse<br>cardiovascular event and individual components .....          | 51 |
| Figure S6: Severe hypoglycemic events with and without blood glucose measurements .....                                                                | 52 |
| Figure S7: Severe hypoglycemia on-treatment sensitivity analyses.....                                                                                  | 53 |
| Figure S8: Incidence of severe hypoglycemia on-treatment sensitivity analyses.....                                                                     | 54 |
| Figure S9: Incidence of severe hypoglycemia subgroup analyses .....                                                                                    | 55 |
| Figure S10: Daily bolus insulin dose over time (units) .....                                                                                           | 56 |
| Figure S11: Daily basal insulin dose over time (units/kg) .....                                                                                        | 57 |
| Figure S12: Pre-breakfast self-measured plasma glucose over time .....                                                                                 | 58 |
| Table S1: Titration algorithms .....                                                                                                                   | 59 |
| Table S2: Baseline characteristics .....                                                                                                               | 60 |
| Table S3: Concomitant antihyperglycemic and cardiovascular medications started after baseline and<br>prevalent use at end of study .....               | 65 |
| Table S4: Cardiovascular risk factors .....                                                                                                            | 66 |
| Table S5: Malignant neoplasms by primary organ site .....                                                                                              | 67 |
| Table S6: Serious adverse events by system organ class with frequencies $\geq 1\%$ .....                                                               | 68 |
| Table S7: Serious adverse events by preferred term with frequencies $\geq 1\%$ .....                                                                   | 69 |
| Table S8: Critical symptoms of Event Adjudication Committee-confirmed severe hypoglycemic<br>episodes by serious adverse event and preferred term..... | 70 |

## **DEVOTE Committee members and Investigators**

### **Steering Committee:**

Kirstine Brown-Frandsen, Novo Nordisk A/S, Søborg, Denmark; **John B. Buse (Vice-Chairman)**, University of North Carolina School of Medicine, Chapel Hill, North Carolina, USA; Scott S. Emerson, University of Washington, Seattle, Washington, USA; Poul-Martin Haahr, Novo Nordisk A/S, Bagsværd, Denmark (March 2015 to present); Liliana Hansen, Novo Nordisk A/S, Bagsværd, Denmark (Trial start to March 2015); Martin Lange, Novo Nordisk A/S, Søborg, Denmark; **Steven P. Marso (Chairman)**, Research Medical Center, Kansas City, Missouri, USA; Alan Moses, Novo Nordisk A/S, Søborg, Denmark (Trial start to October 2014; November 29 2016 to present); Darren K. McGuire, University of Texas Southwestern Medical Center, Dallas, Texas, USA; Thomas R. Pieber, Medical University of Graz, Graz, Austria; Neil R. Poulter, Imperial Clinical Trials Unit, Imperial College London, London, UK; Richard E. Pratley, Florida Hospital Translational Research Institute for Diabetes and Metabolism and Sanford Burnham Prebys Medical Discovery Institute, Orlando, Florida, USA; Rasmus Rabøl, Novo Nordisk A/S, Søborg, Denmark (Trial start to September 2016); Bernard Zinman, Lunenfeld-Tanenbaum Research Institute, Mount Sinai Hospital, University of Toronto, Toronto, Ontario, Canada.

### **Data Monitoring Committee:**

Angelyn Bethel, Oxford Center for Diabetes, Endocrinology, and Metabolism, Churchill Hospital, University of Oxford, Oxford, UK; **James A. de Lemos (DMC Chairman)**, University of Texas Southwestern, Dallas, Texas, USA; Stephen Senn, Competence Center for Methodology and Statistics (CCMS), The Luxembourg Institute of Health, Strassen, Luxembourg; Lee Schwamm, Department of Neurology, Massachusetts General Hospital, Boston, Massachusetts, USA; Adam Timmis, Bart's Heart Center, St. Bartholomew's Hospital, London, UK.

### **Event Adjudication Committee:**

Amer Alsheklee, Depaul Health Center, St. Louis, Missouri, USA (January 2014 to end of trial); Richard G. Bach, Washington University School of Medicine, St. Louis, Missouri, USA (January 2014 to end of trial); Therese M. Bertram (Back-up PT nurse), Quality Assurance, Valmeyer, Illinois, USA (December 2014 to end of trial); **Bernard R. Chaitman (EAC Chairman)**, Saint Louis University Core ECG Laboratory, St. Louis, Missouri, USA (January 2014 to end of trial); Salvador Cruz-Flores, Saint Louis University School of Medicine, St. Louis, Missouri, USA (January 2014 to end of trial); Jane F. Eckstein (Primary PT nurse), Saint Louis University Health Sciences Center, Richmond Heights, Missouri (January 2014 to end of trial); Eliahu S. Feen, Saint Louis University School of Medicine, St. Louis, Missouri, USA (January 2014 to end of trial); Simon J. Fisher, University of Utah School of Medicine, Salt Lake City, Utah, USA (October 2014 to end of trial); Gilbert Gosselin, Institut de Cardiologie de Montréal, Montreal, Quebec, Canada (January 2014 to end of trial); Michael J. Lim, Saint Louis University Health Sciences Center, St. Louis, Missouri, USA (January 2014 to March 2016); James L. Rosenzweig, Boston University School of Medicine, Boston, Massachusetts, USA (May 2014 to December 2014); Robert S. Sherwin, Yale School of Medicine, Section of Endocrinology, New Haven, Connecticut, USA (July 2014 to end of trial); Garry S. Tobin, Washington University School of Medicine Division of Endocrinology and Metabolism, St. Louis, Missouri, USA (April 2014 to end of trial); George Vetrovec, Vetrovec Medical Consulting, Richmond, Virginia, USA (November 2015 to end of trial); David C. Ziemer, Emory University, Department of Medicine Division of Endocrinology, Metabolism, and Lipids, Atlanta, Georgia, USA (May 2015 to end of trial).

### **Neoplasm classification members:**

**Gedske Daugaard (Chairman)**, Rigshospitalet, Onkologisk Klinik, Copenhagen, Denmark (Whole trial); Özlem Er, Acibadem University, Medical Faculty, Oncology Department, Istanbul, Turkey (Whole trial); Michael Pollak, Department of Oncology, Jewish General Hospital/McHill University, Montreal, Quebec, Canada (Trial start to February 2016); Lisa Sengeløv, Department of Oncology, Herlev Hospital, Copenhagen, Denmark (April 2016 to end of trial).

### **Global Expert Panel:**

Yu-Bae Ahn, Catholic University of Korea, Seoul, South Korea; Aslam Amod, Chatsmed Garden Hospital, Chatworth, South Africa; Mariana Benroubi, Polyclinic General Hospital, Athens, Greece; Apussanee Boonyavarakul, Phramongkutklo Hospital, Bangkok, Thailand; Silvija Canecki-Varzic, Clinical Hospital Center Osijek, Zagreb, Croatia; Agostino Consoli, Università degli studi G. D'Annunzio, Pescara, Italy; Freddy G. Eliaschewitz, Centro de Pesquisas Clínicas (CPCLIN)/Albert Einstein Hospital, São Paulo, Brazil; Edward Franek, Central Clinical Hospital MSW, Warsaw, Poland; Hideaki Jinnouchi, Junnouchi Hospital, Kumamoto, Japan; Alexander L. Khokhlov, Clinical Hospital no. 2, Yaroslavl, Russia; Ambrish Mithal, Medanta - the Medicity, Gurgaon, Haryana, India; **Athena Philis-Tsimikas (Co-Chair)**, Scripps Whittier Diabetes Institute, San Diego, California, USA; Tiong Kiam Ong, Sarawak Heart Centre, Sarawak, Malaysia; Lavinia Pop, CMI Diabet Nutritie Boli Metabolice, Bd. Independentei, Baia Mare, Romania; Leobardo Sauque Reyna, Instituto de Diabetes Obesidad y Nutrición S.C., Cuernavaca, Morelos, Mexico; Helena W. Rodbard, Endocrine and Metabolic Consultants, Rockville, Maryland, USA; Daoud Roula, CHU Ibn Badis Hospital, Constantine, Algeria; Ponnusamy Saravanan, University of Warwick, Coventry, UK; Giorgio Sesti, Università di Catanzaro, Catanzaro, Italy; **Christopher Sorli (Co-Chair)**, Billings Clinic, Billings, Montana, USA (Trial start to October 2016); Georgina Sposetti, Instituto de Investigaciones Clínicas Mar del Plata, Buenos Aires, Argentina; Francisco-José Tinahones-Madueño, Hospitales Regional y Virgen de la Victoria, Málaga, Spain; Vincent Woo, University of Manitoba, Winnipeg, Manitoba, Canada.

### **Patient Retention Panel:**

Lori Berard, Winnipeg Diabetes Research Group, Winnipeg, Manitoba, Canada; Irene Caballero Mateos, Hospital Virgen Macarena, Sevilla, Andalusia, Spain (Trial start to June 2015); Alison Cooper, Texas Diabetes & Endocrinology, Austin, Texas, USA; Clarisa DeLuca, Instituto de Investigaciones Clínicas Mar del Plata, Buenos Aires, Argentina; Julie Fillary, Lister Hospital, Stevenage, UK; Diyana Gan Abdul Rahman Gan, Columbia Asia Hospital Seremban, Seremban, Negeri Seremban, Malaysia; Amina Goondiwala, Soweto Clinical Trial Centre, Soweto, South Africa; Jessica Tapia, Endocrine Research Solutions, Inc., Roswell, Georgia, USA.

### **USA National Expert Panel:**

Robert Busch, Albany Medical College, Albany, New York, USA; Louis Chaykin, Meridien Research, Bradenton, Florida, USA; Alison Cooper, Texas Diabetes & Endocrinology, Austin, Texas, USA; Priscilla Hollander, Baylor Endocrine Center, Dallas, Texas, USA; Dennis Karounos, University of Kentucky, Lexington, Kentucky, USA; Wendy Lane, Mountain Diabetes & Endocrine Center, Asheville, North Carolina, USA; Ildiko Lingvay, University of Texas Southwestern Medical Center, Dallas, Texas, USA; A. Ola Odugbesan, Physician Research Associates, LLC, Lawrenceville, Georgia, USA; Theresa Ohlson-Elliott, Southgate Medical Group, LLP, West Seneca, New York, USA; Fernando Ovalle, The University of Alabama at Birmingham, Birmingham, Alabama, USA; Kevin M.

Pantalone, Cleveland Clinic, Cleveland, Ohio, USA; Spencer Phelps, Albany Medical College, Albany, New York, USA; Athena Philis-Tsimikas, Scripps Whittier Diabetes Institute, San Diego, California, USA; Rodica Pop-Busui, University of Michigan, Ann Arbor, Michigan, USA; David Robertson, Atlanta Diabetes Associates, Atlanta, Georgia, USA; Helena W. Rodbard, Endocrine and Metabolic Consultants, Rockville, Maryland, USA; Yshay Shlesinger, NorCal Endocrinology and Internal Medicine, San Ramon, California, USA; Robert Silver, Southern New Hampshire Health, Diabetes and Endocrinology, Nashua, New Hampshire, USA; Christopher Sorli, Billings Clinic, Billings, Montana, USA (Trial start to October 2016); Jessica Tapia, Endocrine Research Solutions, Inc., Roswell, Georgia, USA; Mark Warren, Endocrinology and Metabolism Physicians East PA, Greenville, North Carolina, USA.

**DEVOTE trial investigators:**

**Algeria:** Mohammed Arrar, Department of internal medicine, University Hospital of Oran, Oran; Hassani Belkheir, Department of internal medicine, University Hospital of Oran, Oran; Youcef Benabbas, Department of internal medicine, CHU Ibn Badis Hospital, Constantine; Schahrazed Benferhat, Department of Endocrinology & Diabetology, University Hospital of Sidi Bel Abbes, Sidi Bel Abbes; Fatima Benoun, Sidi Bel Abbes Diabetic House Gambetta, Sidi Bel Abbes; Samia Bensalem, Department of internal medicine, CHU Ibn Badis Hospital, Constantine; Samia Bourezane, Bouzzareah Diabetic House, Algiers; Selmane Rafik ELAOUFI, Department of internal medicine, University Hospital of Oran, Oran; Mouna Gourine, Department of internal medicine, University Hospital of Oran, Oran; Mohamed Hadjhabib, Department of Endocrinology & Diabetology, University Hospital of Sidi Bel Abbes, Sidi Bel Abbes; Fouzia Hadjhamou, Bouzzareah Diabetic House, Algiers; Jamila Hakem, Sidi Bel Abbes Diabetic House Gambetta, Sidi Bel Abbes; Nadjib Kaouache, Department of endocrinology, CHU Ibn Badis Hospital, Constantine; Sabrina Khensal, Department of endocrinology, CHU Ibn Badis Hospital, Constantine; Yacine Kitouni, Department of internal medicine, CHU Ibn Badis Hospital, Constantine; Lamine Lakhel, Department of Endocrinology & Diabetology, University Hospital of Sidi Bel Abbes, Sidi Bel Abbes; Al-Kassem Lezzar, Department of endocrinology, CHU Ibn Badis Hospital, Constantine; Imane Aicha Meftah, Department of internal medicine, University Hospital of Oran, Oran; Lahouaria Mehenni, Department of Endocrinology & Diabetology, University Hospital of Sidi Bel Abbes, Sidi Bel Abbes; Nassim Nouri, Department of endocrinology, CHU Ibn Badis Hospital, Constantine; Fatma Oumerzouk, Bouzzareah Diabetic House, Algiers; Daoud Roula, Department of internal medicine, CHU Ibn Badis Hospital, Constantine; Mounia Sakouhi, Department of Endocrinology & Diabetology, University Hospital of Sidi Bel Abbes, Sidi Bel Abbes; Kheira Talha, Department of Endocrinology & Diabetology, University Hospital of Sidi Bel Abbes, Sidi Bel Abbes; Zouaouia Zemri, Sidi Bel Abbes Diabetic House Gambetta, Sidi Bel Abbes.

**Argentina:** Gabriela Caeiro, Centro Diabetológico 'Dr. Waitman', Córdoba; Martha Calveyra, Centro Médico de Nutrición y Diabetes, Buenos Aires; Natalia Cluigt, Instituto de Investigaciones Clínicas Mar del Plata; Veronica Geronazzo, Centro Médico de Nutrición y Diabetes, Buenos Aires; Silvina Lema, Instituto de Investigaciones Clínicas Rosario, Rosario; Pablo Martinez Monferran, Instituto de Investigaciones Clínicas Mar del Plata; Alejandra Oviedo, Centro Médico de Nutrición y Diabetes, Buenos Aires; Jose Pozzi, Centro Diabetológico 'Dr. Waitman', Córdoba; Jorgelina Sala, Instituto de Investigaciones Clínicas Rosario, Rosario; Ana Schindler, Centro Médico de Nutrición y Diabetes, Buenos Aires; Virginia Sernia, Instituto de Investigaciones Clínicas Mar del Plata; Maximiliano Sicer, Instituto de Investigaciones Clínicas Rosario, Rosario; Silvana Solis, Centro Diabetológico 'Dr. Waitman', Córdoba; Georgina Sposetti, Instituto de Investigaciones Clínicas Mar del Plata; Patricia Varela, Instituto de Investigaciones Clínicas Mar del Plata; Jorge Waitman, Centro Diabetológico 'Dr. Waitman', Córdoba.

**Brazil:** Gustavo Akerman Augusto, CPQuali Pesquisa Clínica Ltda, São Paulo; Breno Alves, Serviço de Endocrinologia, Divisão de Clínica Médica, Hospital das Clínicas, Faculdade de Medicina da Universidade de São Paulo (HC-FMUSP), São Paulo; Erica Alves, Centro de Pesquisas Clínicas (CPCLIN), São Paulo; Luciana Barbosa, Instituto de Ciências Farmacêuticas de Estudos e Pesquisa (ICF), Aparecida de Goiânia; Renata Bona, Centro de Pesquisas Clínicas (CPCLIN), São Paulo; João Borges, Centro Pesquisa Clínica do Brasil, Brasília; Adriana Bosco, Instituto de Pesquisa Clínica Ltda (IPEC), São Paulo; Luis Canani, Centro de Pesquisas em Diabetes (CPD), Porto Alegre; Denise Castro, Centro de Pesquisas Clínicas (CPCLIN), São Paulo; Lilian Cavalcante, Centro de Pesquisa em Diabetes e Doenças Endócrino-Metabólicas, Fortaleza; Laura Cechin, Centro Pesquisa Clínica do Brasil, Brasília; Cintia Cercato, Serviço de Endocrinologia, Divisão de Clínica Médica, Hospital das Clínicas, Faculdade de Medicina da Universidade de São Paulo (HC-FMUSP), São Paulo; Carlos Chrisman, Núcleo de Medicina Integrada, Mogi das Cruzes; Carolina Chrisman, Núcleo de Medicina Integrada, Mogi das Cruzes; Rebecca Cintra, Centro Pesquisa Clínica do Brasil, Brasília; Giselle Costa, Centro de Estudos em Diabetes e Hipertensão (CEDH), Fortaleza; Freddy G. Eliaschewitz, Centro de Pesquisas Clínicas (CPCLIN)/Albert Einstein Hospital, São Paulo; Ana Paula Fontenele, Centro de Pesquisa em Diabetes e Doenças Endócrino-Metabólicas, Fortaleza; Adriana Forti, Centro de Estudos em Diabetes e Hipertensão (CEDH), Fortaleza; Beatriz Francisco, Instituto de Pesquisa Clínica Ltda (IPEC), São Paulo; Denise Franco, Centro de Pesquisas Clínicas (CPCLIN), São Paulo; Paulo Genestreti, Centro de Pesquisas Clínicas (CPCLIN), São Paulo; Jorge Gross, Centro de Pesquisas em Diabetes (CPD), Porto Alegre; Ludmila Haddad, Centro Pesquisa Clínica do Brasil, Brasília; Alfredo Halpern, Serviço de Endocrinologia, Divisão de Clínica Médica, Hospital das Clínicas, Faculdade de Medicina da Universidade de São Paulo (HC-FMUSP), São Paulo; Miguel Hissa, Centro de Pesquisa em Diabetes e Doenças Endócrino-Metabólicas, Fortaleza; Camila Leança, CPQuali Pesquisa Clínica Ltda, São Paulo; Beatriz Leão, Centro de Pesquisas Clínicas (CPCLIN), São Paulo; Ana Elisabeth Marinho, Centro de Estudos em Diabetes e Hipertensão (CEDH), Fortaleza; Isabela Miranda, Centro Pesquisa Clínica do Brasil, Brasília; Adriano Nunes, Instituto de Ciências Farmacêuticas de Estudos e Pesquisa (ICF), Aparecida de Goiânia; Fabiana Palhares, Centro de Pesquisas Clínicas (CPCLIN), São Paulo; Christiani Poço, Instituto de Pesquisa Clínica Ltda (IPEC), São Paulo; João Salles, Instituto de Pesquisa Clínica Ltda (IPEC), São Paulo; Celia Sampaio, Centro de Pesquisas Clínicas (CPCLIN), São Paulo; Augusto Santomauro Jr., CPQuali Pesquisa Clínica Ltda, São Paulo; Carla Sartori, Centro de Pesquisas em Diabetes (CPD), Porto Alegre; Rita Sena, Centro de Estudos em Diabetes e Hipertensão (CEDH), Fortaleza; Marina da Silva, Centro Pesquisa Clínica do Brasil, Brasília; Paula da Silva, CPQuali Pesquisa Clínica Ltda, São Paulo; Kátia Siqueira, Centro de Pesquisas Clínicas (CPCLIN), São Paulo; Luiz Turatti, CPQuali Pesquisa Clínica Ltda, São Paulo; Adriana Valenti, Centro de Pesquisas em Diabetes (CPD), Porto Alegre; Enio Vasques, Núcleo de Medicina Integrada, Mogi das Cruzes; Sergio Vencio, Instituto de Ciências Farmacêuticas de Estudos e Pesquisa (ICF), Aparecida de Goiânia; Guilherme Visconti, Centro de Pesquisas Clínicas (CPCLIN), São Paulo.

**Canada:** Andre Belanger, Centre de Recherche Clinique de Laval, Laval, Quebec; Martyn Chilvers, Sarnia Institute of Clinical Research, Sarnia, Ontario; Richard Dumas, Centre de Recherche Clinique de Laval, Laval, Quebec; Carmen Hurd, Winnipeg Regional Health Authority, Winnipeg, Manitoba; Francois Lafleche, Dr. Valdemar Martinho Clinic, Ottawa, Ontario; Paul Lam, Dr. Errol Raff Clinic, Edmonton, Alberta; Valdemar Martinho, Dr. Valdemar Martinho Clinic, Ottawa, Ontario; Jean Palardy, Centre de Recherche Clinique de Laval, Laval, Quebec; Sean Peterson, Sarnia Institute of Clinical Research, Sarnia, Ontario; Errol Raff, Dr. Errol Raff Clinic, Edmonton, Alberta; Linda Sinnaeve, Dr. Linda Sinnaeve Clinic, Chatham, Ontario; David Sullivan, Dr. Linda Sinnaeve Clinic, Chatham, Ontario; Vincent Woo, Winnipeg Regional Health Authority, Winnipeg, Manitoba.

**Croatia:** Vedrana Baraban, Clinical Hospital Centre Osijek, Osijek; Kristina Blaslov, Clinical Hospital Merkur - University Hospital 'Vuk Vrhovac', Zagreb; Tomislav Bulum, Clinical Hospital Merkur - University Hospital 'Vuk Vrhovac', Zagreb; Silvija Canecki Varzic, Clinical Hospital Centre Osijek, Osijek; Maja

Cigrovski Berkovic, Clinical Hospital Centre 'Sestre milosrdnice', Zagreb; Marica Jandric Balen, General Hospital 'Dr Josip Bencevic', Slavonski Brod; Ivan Kruljac, Clinical Hospital Centre 'Sestre milosrdnice', Zagreb; Silvija Lesnjakovic, Clinical Hospital Centre Osijek, Osijek; Tomo Lucijanac, Clinical Hospital Dubrava, Zagreb; Ana Majic, Clinical Hospital Dubrava, Zagreb; Dario Rahelic, Clinical Hospital Dubrava, Zagreb; Lea Smircic-Duvnjak, Clinical Hospital Merkur - University Hospital 'Vuk Vrhovac', Zagreb; Milan Vrkljan, Clinical Hospital Centre 'Sestre milosrdnice', Zagreb; Karin Zibar, Clinical Hospital Merkur - University Hospital 'Vuk Vrhovac', Zagreb; Sidbela Zukanovic, General Hospital 'Dr Josip Bencevic', Slavonski Brod.

**Greece:** Elpida Athanasopoulou, "Laiko" General Hospital of Athens, Athens; Apostolos Benis, "Thermi" Private Hospital, Thessaloniki; Marian Benroubi, Polyclinic General Hospital, Athens; Evanthia Diakoumopoulou, "Laiko" General Hospital of Athens, Athens; John Doupis, Private Clinic "Iatriko Palaiou Falirou", Athens; Theodora Griva, "Ippokrateio" G.H. of Thessaloniki, Thessaloniki; Kyriakos Kazakos, "Thermi" Private Hospital, Thessaloniki; Nikolaos Kypraios, Polyclinic General Hospital, Athens; Stavros Liatis, "Laiko" General Hospital of Athens, Athens; Konstantinos Makrilakis, "Laiko" General Hospital of Athens, Athens; Athina Markou, 'G. Gennimatas' General Hospital of Athens, Athens; Emmanouil Pagkalos, "Thermi" Private Hospital, Thessaloniki; Labrini Papanastasiou, 'G. Gennimatas' General Hospital of Athens, Athens; George Piaditis, 'G. Gennimatas' General Hospital of Athens, Athens; Christos Sampanis, "Ippokrateio" G.H. of Thessaloniki, Thessaloniki; Evangelia Siami, "Laiko" General Hospital of Athens, Athens; Nikolaos Tentolouris, "Laiko" General Hospital of Athens, Athens; Vasiliki Tsiamia, 'G. Gennimatas' General Hospital of Athens, Athens; Ioanna Zografou, "Ippokrateio" G.H. of Thessaloniki, Thessaloniki.

**India:** Pravishal Adling, Ruby Hall Clinic, Pune; Mazher Ali, Care Hospital, Hyderabad; R. M. Anjana, Madras Diabetes Research Foundation, Chennai; Arpita Arora, Dr RML Hospital, Delhi; Vageesh Ayyar, St. John's Hospital and Medical College, Bangalore; Suvro Banerjee, Apollo Gleneagles Hospitals, Kolkata; Ganapathi Bantwal, St. John's Hospital and Medical College, Bangalore; Nikhil Bhagwat, Topiwala National Medical College and BYL Nair Charitable Hospital, Mumbai; Arpandev Bhattacharyya, Manipal Hospital, Bangalore; Anandakumar Bhawarlal, Prashanth Hospital, Chennai; Rabin Chakraborty, Apollo Gleneagles Hospitals, Kolkata; Sanjay Chatterjee, Apollo Gleneagles Hospitals, Kolkata; Tirthankar Chaudhury, Apollo Gleneagles Hospitals, Kolkata; Subhankar Chowdhury, IPGME & R & SSKM Hospital, Kolkata; Priyal Damelia, BJ Medical College and Civil Hospital, Ahmedabad; Mrinal Das, Apollo Gleneagles Hospitals, Kolkata; Sambit Das, Apollo Hospitals, Bhubaneswar; Ankush Desai, Goa Medical College, Goa; Nandani Devru, Dr RML Hospital, Delhi; Khalid Farooqui, Medanta - the Medicity, Gurgaon; Mohd Ashraf Ganie, All India Institute of Medical Sciences, Delhi; Belinda George, St. John's Hospital and Medical College, Bangalore; Debasis Ghosh, Apollo Gleneagles Hospitals, Kolkata; Gopalakrishnan Girithara, K G Hospital & Post Graduate Medical Institute, Coimbatore; Zinzuwadia Haribhai, Sterling Hospital, Ahmedabad; Nupur Jain, Lady Hardinge Medical College & associated hospitals, Delhi; Amandeep Jassar, Fortis Hospital, Mohali; Ameya Joshi, Topiwala National Medical College and B.Y.L. Nair Charitable Hospital, Mumbai; Dilip Kale, Inamdar Multispecialty Hospital, Pune; Shailaja Kale, Inamdar Multispecialty Hospital, Pune; Jayant Kelwade, Care Hospital, Hyderabad; Ashok Khatri, Dr. Jivraj Mehta Health Foundation, Ahmedabad; Bindu Kulshreshtha, Dr RML Hospital, Delhi; Bikas Majumder, Apollo Gleneagles Hospitals, Kolkata; Neeraj Manikath, Calicut Medical College, Calicut; Shubhalaxmi Margekar, Lady Hardinge Medical College & associated hospitals, Delhi; Tiven Marwah, HCG Multi Specialty Hospital, Ahmedabad; Vivek Mathew, St. John's Hospital and Medical College, Bangalore; Ambrish Mithal, Medanta - the Medicity, Gurgaon; N. D. Moulick, Lokmanya Tilak Municipal Medical College and General Hospital, Mumbai; Abhay Mutha, Ruby Hall Clinic, Pune; Ramuu Muthu, Madras Diabetes Research Foundation, Chennai; Asmitha Nalawade, Inamdar Multispecialty Hospital, Pune; Kedareshwar Narvencar, Goa Medical College, Goa; Kaushik Pandit, IPGME & R & SSKM Hospital, Kolkata; Ghanshyam Pangtey, Lady Hardinge Medical College & associated hospitals, Delhi; B. Parthasarathy, Madras Diabetes Research Foundation, Chennai; Sanjeev Phatak, Sterling Hospital, Ahmedabad; Anupam Prakash, Lady Hardinge Medical College & associated

hospitals, Delhi; Pitambar Prusty, Apollo Hospitals, Bhubaneswar; Chandni Radhakrishnan, Calicut Medical College, Calicut; Indu Raja, Madras Diabetes Research Foundation, Chennai; Ranjani Ravikumar, Madras Diabetes Research Foundation, Chennai; Banshi Saboo, Dr Jivraj Mehta Health Foundation, Ahmedabad; Isha Sachdeva, Dr RML Hospital, Delhi; S. Sangeetha, K G Hospital & Post Graduate Medical Institute, Coimbatore; Kasthuri Selvam, Madras Diabetes Research Foundation, Chennai; Bipin Sethi, Care Hospital, Hyderabad; Asha Shah, BJ Medical College and Civil Hospital, Ahmedabad; Harshal K. Shah, HCG Multi Specialty Hospital, Ahmedabad; Priyanshu Shah, Lokmanya Tilak Municipal Medical College and General Hospital, Mumbai; Rushit Shah, BJ Medical College and Civil Hospital, Ahmedabad; Sajid Shaikh, Prince Aly Khan Hospital, Mumbai; Shehla Shaikh, Prince Aly Khan Hospital, Mumbai; K.P. Singh, Fortis Hospital, Mohali; Nallaperumal Sivagnanam, Prashanth Hospital, Chennai; Nikhil Tandon, All India Institute of Medical Sciences, Delhi; Rajesh Thonangi, Dr RML Hospital, Delhi; N. Thulaseedharan, Calicut Medical College, Calicut; Kedar Toraskar, Prince Aly Khan Hospital, Mumbai; Premalatha Varthakavi, Topiwala National Medical College and BYL Nair Charitable Hospital, Mumbai; Sameer Yadav, Lokmanya Tilak Municipal Medical College and General Hospital, Mumbai.

**Italy:** Francesco Androzzoli, Policlinico di Catanzaro, Catanzaro; Franco Arturi, Policlinico di Catanzaro, Catanzaro; Maria Pompea Antonia Baldassarre, Università degli Studi "Gabriele d'Annunzio", Chieti; Milena Barone, Policlinico di Catanzaro, Catanzaro; Alice Bonura, Policlinico "Paolo Giaccone", Palermo; Loredana Bucciarelli, Istituto di Ricovero e Cura a Carattere Scientifico Multimedica, Milan; Chiara Buscemi, Policlinico "Paolo Giaccone", Palermo; Silvio Buscemi, Policlinico "Paolo Giaccone", Palermo; Anna Carnovale, Policlinico Umberto I, Rome; Chiara Caselli, Ospedale Santa Maria delle Croci, Ravenna; Gloria Ceci, Policlinico Umberto I, Rome; Elena Cimino, Ospedale Niguarda, Milan; Alessandra Colella, Policlinico Umberto I, Rome; Agostino Consoli, Università degli Studi "Gabriele d'Annunzio", Chieti; Valentina Crippa, Istituto San Raffaele, Milan; Sabrina Cufone, Policlinico di Catanzaro, Catanzaro; Laura D'Erasmo, Policlinico Umberto I, Rome; Alessandra De Remigis, Università degli Studi "Gabriele d'Annunzio", Chieti; Paolo Di Bartolo, Ospedale Santa Maria delle Croci, Ravenna; Rosa Dionisio, Ospedale Niguarda, Milan; Olga Disoteo, Ospedale Niguarda, Milan; Marcella Fabietti, Policlinico di Catanzaro, Catanzaro; Fabrizio Febo, Università degli Studi "Gabriele d'Annunzio", Chieti; Sebastiano Filetti, Policlinico Umberto I, Rome; Stefano Genovese, Istituto di Ricovero e Cura a Carattere Scientifico Multimedica, Milan; Federica Ginestra, Università degli Studi "Gabriele d'Annunzio", Chieti; Valeria Grancini, Fondazione Istituto di Ricovero e Cura a Carattere Scientifico Ca' Granda, Milan; Elvira Grieco, Policlinico Umberto I, Rome; Andrea Magistro, Istituto San Raffaele, Milan; Marianna Maranghi, Policlinico Umberto I, Rome; Lucilla Monti, Istituto San Raffaele, Milan; Emanuela Orsi, Fondazione IRCCS Ca' Granda, Milan; Francesca Pellicano, Ospedale Santa Maria delle Croci, Ravenna; Daniela Pergolini, Policlinico Umberto I, Rome; Francesca Perticone, Istituto San Raffaele, Milan; PierMarco Piatti, Istituto San Raffaele, Milan; Gianluigi Pizzi, Ospedale Niguarda, Milan; Maurizio Rondinelli, Istituto di Ricovero e Cura a Carattere Scientifico Multimedica, Milan; Margherita Rossi, Istituto San Raffaele, Milan; Mariangela Rubino, Policlinico di Catanzaro, Catanzaro; Giorgio Sesti, Policlinico di Catanzaro, Catanzaro; Emanuela Setola, Istituto San Raffaele, Milan; Elena Succurro, Policlinico di Catanzaro, Catanzaro; Giovanna Tarquini, Policlinico Umberto I, Rome; Giusy Tiseo, Policlinico Umberto I, Rome; Giancarlo Tonolo, Azienda Sanitaria Locale n° 2 Olbia, Olbia; Valentina Villa, Istituto San Raffaele, Milan; Stefania Vo Hong, Policlinico Umberto I, Rome.

**Japan:** Kazushi Amano, Iryo Houjin Shadan Kowakai Heiwadai Hospital, Miyazaki; Remi Hachiya, Clinic of the Institute for Adult Diseases Asahi Life Foundation, Tokyo; Kunio Hieshima, Jinnouchi Hospital, Kumamoto; Koichi Hirao, H.E.C Science Clinic, Yokohama; Tomoko Hisatake, National Center for Global Health and Medicine Center Hospital, Tokyo; Ritsuko Honda, National Center for Global Health and Medicine Center Hospital, Tokyo; Noriko Ihana, National Center for Global Health and Medicine Center Hospital, Tokyo; Kaori Inoue, Clinic of the Institute for Adult Diseases Asahi Life Foundation, Tokyo;



Yasuhiko Iwamoto, Clinic of the Institute for Adult Diseases Asahi Life Foundation, Tokyo; Hideaki Jinnouchi, Jinnouchi Hospital, Kumamoto; Tomio Jinnouchi, Jinnouchi Hospital, Kumamoto; Keizou Kajiwara, Jinnouchi Hospital, Kumamoto; Shoji Kawazu, Clinic of the Institute for Adult Diseases Asahi Life Foundation, Tokyo; Masatoshi Kikuchi, Clinic of the Institute for Adult Diseases Asahi Life Foundation, Tokyo; Takako Kikuchi, Clinic of the Institute for Adult Diseases Asahi Life Foundation, Tokyo; Yoko Koike, H.E.C Science Clinic, Yokohama; Mitsuhsa Komatsu, Shinshu University Hospital, Matsumoto; Atsushi Kumakura, H.E.C Science Clinic, Yokohama; Noboru Kurinami, Jinnouchi Hospital, Kumamoto; Akifumi Kushiya, Clinic of the Institute for Adult Diseases Asahi Life Foundation, Tokyo; Hajime Maeda, H.E.C Science Clinic, Yokohama; Toshihisa Matsuda, JCHO Tokyo Kamata Medical Center, Tokyo; Toshihisa Matsuda, Medical Corporation Association Soshukai SATO MEDICAL CLINIC, Tokyo; Shuji Nakamura, Iryo Houjin Shadan Kowakai Heiwadai Hospital, Miyazaki; Koujin Nakayama, Iryo Houjin Shadan Kowakai Heiwadai Hospital, Miyazaki; Shin-ichi Nishio, Shinshu University Hospital, Matsumoto; Yukiko Onishi, Clinic of the Institute for Adult Diseases Asahi Life Foundation, Tokyo; Nobuyuki Sato, JCHO Tokyo Kamata Medical Center, Tokyo; Nobuyuki Sato, Medical Corporation Association Soshukai SATO MEDICAL CLINIC, Tokyo; Yoshihiko Sato, Shinshu University Hospital, Matsumoto; Shinichiro Shirabe, H.E.C Science Clinic, Yokohama; Seigo Sugiyama, Jinnouchi Hospital, Kumamoto; Tomoko Suzuki, Jinnouchi Hospital, Kumamoto; Tazu Tahara, Clinic of the Institute for Adult Diseases Asahi Life Foundation, Tokyo; Toshiko Takao, Clinic of the Institute for Adult Diseases Asahi Life Foundation, Tokyo; Masahiro Takei, Shinshu University Hospital, Matsumoto; Ikutaka Takemoto, JCHO Tokyo Kamata Medical Center, Tokyo; Keiko Takeshige, Shinshu University Hospital, Matsumoto; Kentaro Tanaka, Clinic of the Institute for Adult Diseases Asahi Life Foundation, Tokyo; Shotaro Taniguchi, Iryo Houjin Shadan Kowakai Heiwadai Hospital, Miyazaki; Tetsuro Tsujimoto, National Center for Global Health and Medicine Center Hospital, Tokyo; Katsunori Tsukuda, Clinic of the Institute for Adult Diseases Asahi Life Foundation, Tokyo; Sayaka Wakabayashi, Clinic of the Institute for Adult Diseases Asahi Life Foundation, Tokyo; Sayaka Wakabayashi, National Center for Global Health and Medicine Center Hospital, Tokyo; Masanori Yamazaki, Shinshu University Hospital, Matsumoto; Yoko Yoshida, Clinic of the Institute for Adult Diseases Asahi Life Foundation, Tokyo; Ayako Yoshimoto, H.E.C Science Clinic, Yokohama.

**Malaysia:** Imran Zainal Abidin, University Malaya Medical Centre, Kuala Lumpur; Shahrin Tarmizi Che Abdullah, Hospital Tengku Ampuan Afzan, Kuantan; Noor Lita Adam, Hospital Tuanku Ja'afar, Seremban; Madihah Ahmad, Hospital Sultanah Bahiyah, Alor Setar; Nik Nur Fatnoon Nik Ahmad, Hospital Tengku Ampuan Afzan, Kuantan; Nor Hanim Mohd Amin, Sarawak Heart Centre, Sarawak; Cheng Yew Aw, Hospital Melaka, Malacca; Yee Ling Cham, Sarawak Heart Centre, Sarawak; Hui Min Chong, Hospital Tuanku Ja'afar, Seremban; Seng Keong Chua, Sarawak Heart Centre, Sarawak; Sharifah Aisyah Shahabudin Syed Ahmad Fauzi, Hospital Serdang, Selangor; Alan Yean Yip Fong, Sarawak Heart Centre, Sarawak; Abd Kahar Abd Ghapar, Hospital Serdang, Selangor; Norliza Hanafi, Hospital Sultanah Bahiyah, Alor Setar; Muhammad Radzi Abu Hassan, Hospital Sultanah Bahiyah, Alor Setar; Rahimah Ibrahlim, Hospital Tuanku Ja'afar, Seremban; Ning Zan Khiew, Sarawak Heart Centre, Sarawak; Gary Chin Keong Lee, Hospital Serdang, Selangor; Rakesh Lingam, Hospital Melaka, Malacca; Richard Chay Shien Long, Hospital Melaka, Malacca; Kauthaman A. Mahendran, Hospital Melaka, Malacca; Tiong Kiam Ong, Sarawak Heart Centre, Sarawak; Yen Yee Oon, Sarawak Heart Centre, Sarawak; Asri Said, Sarawak Heart Centre, Sarawak; Radhakrishna Sothiratnam, Columbia Asia Medical Centre Seremban, Seremban; Ganiga Srinivasiah Sridhar, University Malaya Medical Centre, Kuala Lumpur; Mohd Azri Mohd Suan, Hospital Sultanah Bahiyah, Alor Setar; Sian Kong Tan, Sarawak Heart Centre, Sarawak; Julian Hock Chuan Tey, Hospital Melaka, Malacca; Abdul Wahab Undok, University Malaya Medical Centre, Kuala Lumpur; Anuar Waid, Hospital Sultanah Bahiyah, Alor Setar; Shalini Vijayasingham, Hospital Melaka, Malacca; Chi Yen Voon, Sarawak Heart Centre, Sarawak; Kuan Leong Yew, Sarawak Heart Centre, Sarawak; Lit Sin Yong, Hospital Tuanku Ja'afar, Seremban.

**Mexico:** Lilia Aguilar-Parra, CICEJ Centro de Investigación Clínica Endocrinológica de Jalisco S.C, Guadalajara; Karen Aguirre, Diseño y Planeacion en Investigación Médica S.C, Guadalajara; Rebeca Alvarez-Carrillo, Diseño y Planeacion en Investigación Médica S.C, Guadalajara; Maria Arechavaleta-Granell, Arechavaleta Granell Maria del Rosario, Guadalajara; Aurelia Baez-Campos, Instituto de Diabetes Obesidad y Nutrición S.C, Cuernavaca; Edmundo Alfredo Bayram Llamas, Fundación Cardiovascular de Aguascalientes A.C, Aguascalientes; Cesar Calvo-Vargas, Diseño y Planeacion en Investigación Médica S.C, Guadalajara; Marielena Cedano-Limon, Diseño y Planeacion en Investigación Médica S.C, Guadalajara; Teresita de Jesús Beltran Jaramillo, Arechavaleta Granell Maria del Rosario, Guadalajara; Jose de Jesus Marin-Lopez, Fundación Cardiovascular de Aguascalientes A.C, Aguascalientes; Maria de Jesus Ruiz Cornejo, Unidad de Investigación Clínica Cardiometabólica de Aguascalientes S.A de C.V, Guadalajara; Maria del Carmen Juarez Cervantes, Fundación Cardiovascular de Aguascalientes A.C, Aguascalientes; Isabel Estevez de Alba, Diseño y Planeacion en Investigación Médica S.C, Guadalajara; Raul Estrada Garcia, Cardioarritmias e Investigación S.C, San Luis Potosi; Suellen Estrada, Diseño y Planeacion en Investigación Médica S.C, Guadalajara; Marisol Garza-Vergara, Diseño y Planeacion en Investigación Médica S.C, Guadalajara; Rosa Gonzalez-Perez, CICEJ Centro de Investigación Clínica Endocrinológica de Jalisco S.C, Guadalajara; Carlos González-Valencia, CICEJ Centro de Investigación Clínica Endocrinológica de Jalisco S.C, Guadalajara; Rosalinda Guerrero-Reyes, Fundación Cardiovascular de Aguascalientes A.C, Aguascalientes; Jose Alfredo Haro Ortiz, Cardioarritmias e Investigación S.C, San Luis Potosi; Eduardo Hernandez Salazar, Arechavaleta Granell Maria del Rosario, Guadalajara; Iris Illescas Diaz, Unidad de Investigación Clínica Cardiometabólica de Aguascalientes S.A de C.V, Guadalajara; Jesus Illescas Diaz, Unidad de Investigación Clínica Cardiometabólica de Aguascalientes S.A de C.V, Guadalajara; Imelda Loreda, Diseño y Planeacion en Investigación Médica S.C, Guadalajara; Silvia Jimenez-Ramos, CICEJ Centro de Investigación Clínica Endocrinológica de Jalisco S.C, Guadalajara; Diana Larios-Mora, CICEJ Centro de Investigación Clínica Endocrinológica de Jalisco S.C, Guadalajara; María Elena López García, Instituto de Diabetes Obesidad y Nutrición S.C, Cuernavaca; Julieta López-Serrano, Fundación Cardiovascular de Aguascalientes A.C, Aguascalientes; Bertha Martinez-Nolasco, CICEJ Centro de Investigación Clínica Endocrinológica de Jalisco S.C, Guadalajara; Ricardo Nuñez Marquez, Arechavaleta Granell Maria del Rosario, Guadalajara; Elizabeth Pacheco Aranda, Fundación Cardiovascular de Aguascalientes A.C, Aguascalientes; Irving Peralta-Cantu, Instituto de Diabetes Obesidad y Nutrición S.C, Cuernavaca; Ana Perez Chagollan, Unidad de Investigación Clínica Cardiometabólica de Aguascalientes S.A de C.V, Guadalajara; María Ramírez, Diseño y Planeacion en Investigación Médica S.C, Guadalajara; Israel Robledo Durón, Arechavaleta Granell Maria del Rosario, Guadalajara; Ignacio Rodriguez Briones, Cardioarritmias e Investigación S.C, San Luis Potosi; María Rodríguez, Diseño y Planeacion en Investigación Médica S.C, Guadalajara; Leobardo Sauque Reyna, Instituto de Diabetes Obesidad y Nutrición S.C, Cuernavaca; Adriana Vazquez-Ceja, Diseño y Planeacion en Investigación Médica S.C, Guadalajara; Alejandro Vera-Bocanegra, Diseño y Planeacion en Investigación Médica S.C, Guadalajara; Maricela Vidrio Velazquez, Unidad de Investigación Clínica Cardiometabólica de Aguascalientes S.A de C.V, Guadalajara; Aleida Yael Contreras Sandoval, Arechavaleta Granell Maria del Rosario, Guadalajara.

**Poland:** Karol Bartelik, Centrum Badan Klinicznych PI-House, Gdansk; Aleksandra Bilka, Szpital Specjalistyczny Nr 2, Bytom; Tomasz Biniszkiwicz, Szpital Specjalistyczny Nr 2, Bytom; Pawel Bogdanski, Centrum Zdrowia Metabolicznego, Poznan; Agnieszka Chamienia, Centrum Badan Klinicznych PI-House, Gdansk; Anna Cieslak-Puchalska, Indywidualna Specjalistyczna Praktyka Lekarska, dr n.med. Elwira Gromniak, Szczecin; Wojciech Czochra, KO-MED Centra Kliniczne Zamosc, Zamosc; Edward Franek, CSKMSW w Warszawie, Centrum Diabetologiczne, Warsaw; Bogdan Gajewski, Centrum Badan Klinicznych PI-House, Gdansk; Elwira Gromniak, Indywidualna Specjalistyczna Praktyka Lekarska, dr n.med. Elwira Gromniak, Szczecin; Ewa Holda, Indywidualna Specjalistyczna Praktyka Lekarska, dr n.med. Elwira Gromniak, Szczecin; Barbara Jaskulska-Gorzelewska, Centrum Badan Klinicznych PI-House, Gdansk; Krystyna Jedynasty, CSKMSW w Warszawie, Centrum Diabetologiczne, Warsaw; Elzbieta Kloda, Centrum Badan Klinicznych PI-House, Gdansk; Beata Kmak-

Balawender, NZOZ Krakmed, Krakow; Iwona Kobielska-Gembala, Oswiecimskie Centrum Badan Klinicznych MEDICOME, Oswiecim; Marek Konieczny, KO-MED Centra Kliniczne Zamosc, Zamosc; Elzbieta Kramarczuk, KO-MED Centra Kliniczne Zamosc, Zamosc; Jerzy Kuleta, NZOZ Krakmed, Krakow; Robert Lesniewski, CSKMSW w Warszawie, Centrum Diabetologiczne, Warsaw; Teresa Lominska, CSKMSW w Warszawie, Centrum Diabetologiczne, Warsaw; Monika Lukaszewicz, Centrum Badan Klinicznych PI-House, Gdansk; Izabella Majewska, Indywidualna Specjalistyczna Praktyka Lekarska, dr n.med. Elwira Gromniak, Szczecin; Tomasz Mlynarski, KO-MED Centra Kliniczne Zamosc, Zamosc; Aleksandra Mostowy, Szpital Specjalistyczny Nr 2, Bytom; Anna Rybak, KO-MED Centra Kliniczne Zamosc, Zamosc; Damian Skrypnik, Centrum Zdrowia Metabolicznego, Poznan; Malgorzata Wolny, Indywidualna Specjalistyczna Praktyka Lekarska, dr n.med. Elwira Gromniak, Szczecin; Witold Zmuda, Oswiecimskie Centrum Badan Klinicznych MEDICOME, Oswiecim.

**Romania:** Alina Nicoleta Buduru, CMI Diabet Nutritie Boli Metabolice, Bd. Independentei, Baia Mare; Adriana Cif, SC MEDIAB SRL, Targu Mures; Mihaela Cozma, CMI Diabet Nutritie Boli Metabolice, Bd. Independentei, Baia Mare; Carmen Crisan, SC MEDIAB SRL, Targu Mures; Cristian Gelu Barbonta, SC Diana Barbonta SRL, Alba Iulia; Diana Barbonta, SC Diana Barbonta SRL, Alba Iulia; Madalina Mihalcea, Diabmed Dr Popescu Alexandrina SRL, Ploiesti; Mihaela Mociran, CMI Diabet Nutritie Boli Metabolice, Bd. Independentei, Baia Mare; Sorina Muresan, SC MEDIAB SRL, Targu Mures; Lavinia Pop, CMI Diabet Nutritie Boli Metabolice, Bd. Independentei, Baia Mare; Alexandrina Popescu, Diabmed Dr Popescu Alexandrina SRL, Ploiesti; Luchiana Pruna, CMI Diabet Nutritie Boli Metabolice, Bd. Independentei, Baia Mare; Nadia Ramona Sandu, SC MEDIAB SRL, Targu Mures; Oana Andreea Suleac, SC Diana Barbonta SRL, Alba Iulia; Eva Cornelia Vincze, CMI Diabet Nutritie Boli Metabolice, Bd. Independentei, Baia Mare.

**Russia:** Elena Andreeva, Tver Regional Clinical Hospital, Tver; Irina Barykina, Volgograd State Medical University, Volgograd; Angela Bernitcyna, City Multifield Hospital #2, Saint-Petersburg; Svetlana Berns, Scientific-Research Institute of Complex Problems of Cardiovascular Diseases, Kemerovo; Natalia Bezdenezhnykh, Scientific-Research Institute of Complex Problems of Cardiovascular Diseases, Kemerovo; Elena Chumachek, Volgograd State Medical University, Volgograd; Svetlana Demarina, City clinical hospital #2, Yaroslavl; Anna Didenko, City Diabetes Centre #3 based on City Outpatient Clinic #17, Saint-Petersburg; Nadezhda Dubinina, City Clinical Hospital #13 of Avtozavodskiy district of Nizhniy Novgorod, Nizhniy Novgorod; Irina Dzherieva, City Emergency Hospital, Rostov-on-Don; Olga Elsukova, Kirov Clinical Hospital #7 n.a. V.I. Yurlova, Kirov; Lev Esenyan, City Clinical Hospital #15 n.a. O.M. Filatov, Moscow; Ekaterina Filippova, LLC "Medinet", Saint-Petersburg; Nadezhda Gabova, Consultative Diagnostic Center, Syktyvkar; Irina Garina, City Emergency Hospital, Rostov-on-Don; Yulia Glikman, City Diabetes Centre #3 based on City Outpatient Clinic #17, Saint-Petersburg; Svetlana Glova, City Emergency Hospital, Rostov-on-Don; Ekaterina Goncharova, 1st Moscow State Medical University n.a. I.M. Setchenov based on City Clinical Hospital #67, Moscow; Elena Gorbatova, 1st Moscow State Medical University n.a. I.M. Setchenov based on City Clinical Hospital #67, Moscow; Ivan Gordeev, City Clinical Hospital #15 n.a. O.M. Filatov, Moscow; Inessa Grigorian, City Clinical Hospital #13 of Avtozavodskiy district of Nizhniy Novgorod, Nizhniy Novgorod; Svetlana Gromova, Saratov Regional Clinical Hospital, Saratov; Irina Ipatko, Consultative Diagnostic Center, Syktyvkar; Elena Karaban, LLC "Medical Diagnostic Centre "Energ", Saint-Petersburg; Dr. Yulia Katushkina, Regional Clinical Hospital #1 n.a. prof. S.V. Ochapovskiy, Krasnodar; Olga Kaygorodtseva, City Out-patient Clinic #37, Saint-Petersburg; Irina Kerova, Ulianovsk Regional Clinical Hospital, Ulianovsk; Larisa Khaisheva, City Emergency Hospital, Rostov-on-Don; Oleg Khmel'nitskiy, LLC "Medical Diagnostic Centre "Energ", Saint-Petersburg; Alexander Khokhlov, City clinical hospital #2, Yaroslavl; Mikhail Khokhlov, Ulianovsk Regional Clinical Hospital, Ulianovsk; Ekaterina Khorolets, City Emergency Hospital, Rostov-on-Don; Elena Klyuenkova, Consultative Diagnostic Center, Syktyvkar; Olga Konovalova, Tver Regional Clinical Hospital, Tver; Ksenia Korneva, City Clinical Hospital #13 of Avtozavodskiy district of Nizhniy Novgorod, Nizhniy Novgorod; Elena Kosmacheva, Regional Clinical Hospital #1 n.a. prof. S.V. Ochapovskiy, Krasnodar; Marina Kunitsyna, Saratov Regional

Clinical Hospital, Saratov; Tatiana Kupriyanova, Scientific-Research Institute of Complex Problems of Cardiovascular Diseases, Kemerovo; Natalia Kuznetsova, Consultative Diagnostic Center, Syktyvkar; Olga Lantseva, City Diabetes Centre #3 based on City Outpatient Clinic #17, Saint-Petersburg; Alla Ledyeva, Volgograd State Medical University, Volgograd; Elena Lileeva, City clinical hospital #2, Yaroslavl; Alexander Markovich, LLC "Medinet", Saint-Petersburg; Narine Martirosian, 1st Moscow State Medical University n.a. I.M. Setchenov based on City Clinical Hospital #67, Moscow; Alisa Maslova, City Diabetes Centre #3 based on City Outpatient Clinic #17, Saint-Petersburg; Galina Milyukova, Ulianovsk Regional Clinical Hospital, Ulianovsk; Irina Mokhova, City Diabetes Centre #3 based on City Outpatient Clinic #17, Saint-Petersburg; Olga Nagirniak, Scientific-Research Institute of Complex Problems of Cardiovascular Diseases, Kemerovo; Elena Nastina, Kirov Clinical Hospital #7 n.a. V.I. Yurlova, Kirov; Sergei Nedogoda, Volgograd State Medical University, Volgograd; Valeriia Orlova, City Multifield Hospital #2, Saint-Petersburg; Svetlana Otarova, City Clinical Hospital #15 n.a. O.M. Filatov, Moscow; Marina Ostapenko, City clinical hospital #2, Yaroslavl; Nino Papaskiri, City Multifield Hospital #2, Saint-Petersburg; Elena Pavlikova, City Clinical Hospital #15 n.a. O.M. Filatov, Moscow; Andrey Peskov, Ulianovsk Regional Clinical Hospital, Ulianovsk; Galina Petrik, Regional Clinical Hospital #1 n.a. prof. S.V. Ochapovskiy, Krasnodar; Alexander Petrov, City Clinical Hospital #13 of Avtozavodskiy district of Nizhniy Novgorod, Nizhniy Novgorod; Nina Petunina, 1st Moscow State Medical University n.a. I.M. Setchenov based on City Clinical Hospital #67, Moscow; Dmitry Platonov, Tver Regional Clinical Hospital, Tver; Yulia Poliakova, Regional Clinical Hospital #1 n.a. prof. S.V. Ochapovskiy, Krasnodar; Zhanna Potapova, Saratov Regional Clinical Hospital, Saratov; Svetlana Pribylova, Ulianovsk Regional Clinical Hospital, Ulianovsk; Igor Razumovsky, City Emergency Hospital, Rostov-on-Don; Alexander Redkin, City Emergency Hospital, Rostov-on-Don; Tatyana Rodionova, City Clinical Hospital # 9, Saratov; Evgenia Rudenko, Tver Regional Clinical Hospital, Tver; Natalia Rykalina, Ulianovsk Regional Clinical Hospital, Ulianovsk; Alla Salasyuk, Volgograd State Medical University, Volgograd; Tatiana Semikina, Saratov Regional Clinical Hospital, Saratov; Inna Serebryakova, LLC "Medical Diagnostic Centre "Energ", Saint-Petersburg; Larisa Shanina, LLC "Medinet", Saint-Petersburg; Evgenia Shmidt, Scientific-Research Institute of Complex Problems of Cardiovascular Diseases, Kemerovo; Olga Sinitsina, City clinical hospital #2, Yaroslavl; Svetlana Smetanina, Tyumen State Medical University, Tyumen; Marya Smirnova, Saratov Regional Clinical Hospital, Saratov; Victoria Smirnova, Volgograd State Medical University, Volgograd; Nadezhda Smolentseva, LLC "Medical Diagnostic Centre "Energ", Saint-Petersburg; Alexander Sobolev, Kirov Clinical Hospital #7 n.a. V.I. Yurlova, Kirov; Anna Soldatenkova, Consultative Diagnostic Center, Syktyvkar; Yulia Soldatova, City Clinical Hospital #13 of Avtozavodskiy district of Nizhniy Novgorod, Nizhniy Novgorod; Svetlana Speshilova, City clinical hospital #2, Yaroslavl; Olga Startseva, Consultative Diagnostic Center, Syktyvkar; Larisa Strezhova, City Diabetes Centre #3 based on City Outpatient Clinic #17, Saint-Petersburg; Leonid Strongin, City Clinical Hospital #13 of Avtozavodskiy district of Nizhniy Novgorod, Nizhniy Novgorod; Lyudmila Suplotova, Tyumen State Medical University, Tyumen; Daria Suvorova, Kirov Clinical Hospital #7 n.a. V.I. Yurlova, Kirov; Alisa Tepaeva, City Clinical Hospital # 9, Saratov; Alisa Tepaeva, LLC "Medinet", Saint-Petersburg; Liubov Trukhina, 1st Moscow State Medical University n.a. I.M. Setchenov based on City Clinical Hospital #67, Moscow; Alisa Tyugaeva, City Clinical Hospital # 9, Saratov; Olga Vasyutkova, Tver Regional Clinical Hospital, Tver; Valentina Vinokurova, Saratov Regional Clinical Hospital, Saratov; Elena Yukhno, Scientific-Research Institute of Complex Problems of Cardiovascular Diseases, Kemerovo; Natalia Yuzhakova, Tyumen State Medical University, Tyumen; Olga Zagrebelnaya, City Out-patient Clinic #37, Saint-Petersburg; Alsu Zalevskaya, City Multifield Hospital #2, Saint-Petersburg; Elena Zhukova, Saratov Regional Clinical Hospital, Saratov.

**Spain:** Ismael Aomar Millán, CM Avances Médicos, Granada; Luis M. Beltrán Romero, La Paz, Madrid; Jose Ignacio Fernández Navarro, Hospital Arnau de Vilanova, Valencia; Juan Carlos Ferrer García, Hospital General de Valencia, Valencia; Lourdes García Blasco, Hospital General de Valencia, Valencia; Clara García García, Hospital Virgen de la Macarena, Sevilla; Juan García Puig, La Paz, Madrid; Juan Girbés Borrás, Hospital Arnau de Vilanova, Valencia; Pilar Inigo

Zaera, Hospital Arnau de Vilanova, Valencia; Martín López de la Torre, CM Avances Médicos, Granada; Baldomera Martínez Alfaro, CEP San José Obrero, Málaga; Cristobal Morales Portillo, Hospital Virgen de la Macarena, Sevilla; Paloma Romero Sanchez, CEP San José Obrero, Málaga; Nerea Sebastián Ochoa, CEP San José Obrero, Málaga; Isabel Serrano Olmedo, Hospital Virgen de la Macarena, Sevilla; Francisco Tinahones Madueño, CEP San José Obrero, Málaga; Rosa Torres Jimenez, La Paz, Madrid.

**South Africa:** Aslam Amod, Chatsmed Garden Hospital, Durban; AO Adeyemo, Louis Pasteur Hospital, Pretoria; Ayesha Bassa, Mzansi Ethical Research Centre, Middleburg; A Bhorat, Soweto Clinical Trial Centre, Johannesburg; Qasim Bhorat, Soweto Clinical Trial Centre, Johannesburg; Laura Blacking, Centre for Diabetes and Endocrinology, Johannesburg; Lesley Burgess, Tread Research cc, Cape Town; Kathleen Coetzee, Tread Research cc, Cape Town; Hillet Conradie, Synexus Helderberg Clinical Trials Centre, Cape Town; Henry Cyster, City Hospital, Cape Town; Henry Cyster, Tread Research cc, Cape Town; Larry Distiller, Centre for Diabetes and Endocrinology, Johannesburg; G.C. Ellis, Synexus Helderberg Clinical Trials Centre, Cape Town; Mashra Gani, Jedidiah Clinical Research Centre, Port Elizabeth; Debra Gordon, Centre for Diabetes and Endocrinology, Johannesburg; Parimala Govender, Aliwal Shoal Medical Centre, Umkomaas; Thirumani Govender, Tread Research cc, Cape Town; Vimladhevi Govender, Chatsmed Garden Hospital, Durban; Daksha Jivan, Charlotte Maxeke Johannesburg Academic Hospital, Johannesburg; Barry Joffe, Centre for Diabetes and Endocrinology, Johannesburg; Yaseer Jooma, Mzansi Ethical Research Centre, Middleburg; Hilton Kaplan, Dr Hilton Kaplan's Rooms, Cape Town; Stephanus Komati, Louis Pasteur Hospital, Pretoria; Brian Kramer, Centre for Diabetes and Endocrinology, Johannesburg; Sieglinde Kruger, Armansis Medical Centre, Brits; Stanley Landau, Centre for Diabetes and Endocrinology, Johannesburg; Gulam Latiff, Maxwell Centre, Durban; L Maritz, Tread Research cc, Cape Town; Peter Matthews, Mzansi Ethical Research Centre, Middleburg; S J Middlemost, Synexus Helderberg Clinical Trials Centre, Cape Town; Nomangesi Ngcakani, Jedidiah Clinical Research Centre, Port Elizabeth; Hennie Nortje, City Hospital, Cape Town; Yasmin Osman, Maxwell Centre, Durban; Trevenesan Padayachee, Aliwal Shoal Medical Centre, Umkomaas; Gracjan Podgorski, Greenacres Hospital, Port Elizabeth; Jenny Potts, Greenacres Hospital, Port Elizabeth; Catharina Pretorius, Synexus Helderberg Clinical Trials Centre, Cape Town; Hans Prozesky, Tread Research cc, Cape Town; Hans Snyman, Armansis Medical Centre, Brits; Hans Snyman, Armansis Medical Centre, Brits; Mohammed Tayob, Mzansi Ethical Research Centre, Middleburg; Dorothea Urbach, Synexus Helderberg Clinical Trials Centre, Cape Town; Maryke van der Merwe, Synexus Helderberg Clinical Trials Centre, Cape Town; Haroon Vorajee, Soweto Clinical Trial Centre, Johannesburg; Nadine Wilson, Dr Hilton Kaplan's Rooms, Cape Town; J.R. Wing, Charlotte Maxeke Johannesburg Academic Hospital, Johannesburg.

**South Korea:** Yu-Bae Ahn, The Catholic University of Korea, St.Vincent Hospital, Suwon-si; Jie Eun Lee, Seoul National University Hospital, Seoul; Chang Ho Ahn, Seoul National University Hospital, Seoul; Nam Hoon Kim, Korea University Anam Hospital, Seoul; Sun Hwa Kim, Korea University Anam Hospital, Seoul; Yul Hwangbo, Seoul National University Hospital, Seoul; Sun Hye Ko, The Catholic University of Korea, St.Vincent Hospital, Suwon-si; Jee Hyun An, Korea University Anam Hospital, Seoul; Seung Hyun Ko, The Catholic University of Korea, St.Vincent Hospital, Suwon-si; Ji Hyun Lee, Seoul National University Hospital, Seoul; Jung Hyun Noh, Inje University Ilsan Paik Hospital, Goyang-si; Myeong Jin Ji, Seoul National University Hospital, Seoul; Kyeong Jin Kim, Korea University Anam Hospital, Seoul; Chan-Hyeon Jung, Seoul National University Hospital, Seoul; DongJun Kim, Inje University Ilsan Paik Hospital, Goyang-si; Kyongyoung Kim, Seoul National University Hospital, Seoul; Lee-Kyung Kim, Seoul National University Hospital, Seoul; SinGon Kim, Korea University Anam Hospital, Seoul; Eun Ky Kim, Seoul National University Hospital, Seoul; Dong-Hwa Lee, Seoul National University Hospital, Seoul; Young Min Cho, Seoul National University Hospital, Seoul; Shin-Je Moon, Seoul National University Hospital, Seoul; Chang-Myung Oh, Seoul National University Hospital, Seoul; A Ram Hong, Seoul National University Hospital, Seoul; Kyeong Seon Park, Seoul National University Hospital, Seoul; Jae Seung Yun, The

Catholic University of Korea, St.Vincent Hospital, Suwon-si; Jae Won Hong, Inje University Ilsan Paik Hospital, Goyang-si; Hee Young Kim, Korea University Anam Hospital, Seoul.

**Thailand:** Apussanee Boonyavarakul, Phramongkutklao Hospital, Bangkok; Supawan Buranapin, Chiang Mai University, Maharaj Nakorn Chiang Mai Hospital, Chiangmai; Chaicharn Deerochanawong, Rajavithi Hospital, Bangkok; Nativuth Hengjeerajarus, Chiang Mai University, Maharaj Nakorn Chiang Mai Hospital, Chiangmai; Natapong Kosachunhanun, Chiang Mai University, Maharaj Nakorn Chiang Mai Hospital, Chiangmai; Srun Kuanprasert, Chiang Mai University, Maharaj Nakorn Chiang Mai Hospital, Chiangmai; Tada Kunavisarut, Siriraj Hospital, Mahidol University, 2 Prannok Rd. Bangkoknoi, Bangkok; Rungnapa Laortanakul, Maharat Nakhon Ratchasima Hospital, Nakhonratchasima; Ampica Mangklabruks, Chiang Mai University, Maharaj Nakorn Chiang Mai Hospital, Chiangmai; Mattabhorn Phornphutkul, Chiang Mai University, Maharaj Nakorn Chiang Mai Hospital, Chiangmai; Hutsaya Prasitdamrong, Phramongkutklao Hospital, Bangkok; Thiti Snabboon, Chulalongkorn University, Bangkok; Apiradee Sriwijitkamol, Siriraj Hospital, Mahidol University, 2 Prannok Rd. Bangkoknoi, Bangkok; Sompongse Suwanwalaikorn, Chulalongkorn University, Bangkok; Puntip Tantiwong, Maharat Nakhon Ratchasima Hospital, Nakhonratchasima; Sirakarn Tejavaniya, Phramongkutklao Hospital, Bangkok; Yongkasem Vorasettakarnkit, Chulalongkorn University, Bangkok.

**United Kingdom:** Samer Alasabbagh, Lister Hospital, Stevenage; Christos Bagais, George Eliot Hospital, Nuneaton; Polly Bingley, Southmead Hospital, Bristol; Les Borthwick, Lister Hospital, Stevenage; Barbara Brett, Western General Hospital, Edinburgh; Sue Davidson, Royal Surrey County Hospital, Guildford; Jane Ewing, Clinical Research & Trial Unit, Norwich; Robert Garesse, Royal Surrey County Hospital, Guildford; Syed Gillani, New Cross Hospital, Wolverhampton; Konstantinos Gkastaris, Southmead Hospital, Bristol; Roselle Herring, Royal Surrey County Hospital, Guildford; Graham Illsley, Ninewells Hospital, Dundee; Andrew Johnson, Southmead Hospital, Bristol; Felicity Kaplan, Lister Hospital, Stevenage; Kathryn Lonnen, Southmead Hospital, Bristol; Ellen Malcolm, Ninewells Hospital, Dundee; Rory McCrimmon, Ninewells Hospital, Dundee; John Mcknight, Western General Hospital, Edinburgh; Rajiv Nair, George Eliot Hospital, Nuneaton; Vinod Patel, George Eliot Hospital, Nuneaton; Ewan Pearson, Ninewells Hospital, Dundee; Rajeev Raghavan, New Cross Hospital, Wolverhampton; Suchitra Raj, Royal Surrey County Hospital, Guildford; David Russell-Jones, Royal Surrey County Hospital, Guildford; Mike Sampson, Clinical Research & Trial Unit, Norwich; Ponnusamy Saravanan, George Eliot Hospital, Nuneaton; Baldev Singh, New Cross Hospital, Wolverhampton; Nithya Sukamer, George Eliot Hospital, Nuneaton; Jeremy Turner, Clinical Research & Trial Unit, Norwich; Hema Venkataraman, George Eliot Hospital, Nuneaton; Adie Viljoen, Lister Hospital, Stevenage; Deborah Wake, Ninewells Hospital, Dundee.

#### **United States:**

*Alabama:* Cassandra Barnes, Healthscan Research, Montgomery; Gary Boyd, Achieve Clinical Research LLC, Birmingham; Gwen Childress, Extended Arm Physicians Inc., Montgomery; Debora Coleman, Extended Arm Physicians Inc., Montgomery; Judy Combs, Achieve Clinical Research LLC, Birmingham; Leon Davis, Extended Arm Physicians Inc., Montgomery; Kentress Davison, University of Alabama at Birmingham, Birmingham; David DeAtkine, Achieve Clinical Research LLC, Birmingham; Linda Dunaway, Healthscan Research, Montgomery; Janet Duncan, Healthscan Research, Montgomery; Nina Hibbard, Healthscan Research, Montgomery; Melissa Martin, Achieve Clinical Research LLC, Birmingham; Melissa Nichols, Achieve Clinical Research LLC, Birmingham; Fernando Ovalle, University of Alabama at Birmingham, Birmingham; Karolynn Painter, Achieve Clinical Research LLC, Birmingham; Tammy Perkins,

University of Alabama at Birmingham, Birmingham; Rosylen Quinney, Achieve Clinical Research LLC, Birmingham; Katrina Raymond, Extended Arm Physicians Inc., Montgomery; Christopher Roney, Achieve Clinical Research LLC, Birmingham; Gilberto Sanchez, Healthscan Research, Montgomery; James Sosnowchik, Achieve Clinical Research LLC, Birmingham; Farah Sultan, Achieve Clinical Research LLC, Birmingham; Shellie Talley, Achieve Clinical Research LLC, Birmingham; Bruce Trippe, Healthscan Research, Montgomery; Pamela Tuck, Healthscan Research, Montgomery; T Vaughan, University of Alabama at Birmingham, Birmingham; Amy Warriner, University of Alabama at Birmingham, Birmingham; Tamara Watts, Healthscan Research, Montgomery; Hayes Williams, Achieve Clinical Research LLC, Birmingham.

*Arizona:* Aiden Abidov, University of Arizona Section of Endocrinology , Tucson; Yulia Abidov, University of Arizona Section of Endocrinology , Tucson; Corey Anderson, DCR-PI, PC, Goodyear; Vanessa Avila, Central Phoenix Medical Clinic/Clinical Research Advantage, Phoenix; Vanessa Avila, Clinical Research Advantage, Inc./Lenzmeier Family Practice, Glendale; James Baraniak, Clinical Research Advantage, Inc./Lenzmeier Family Practice, Glendale; Barbara Berry, Central Phoenix Medical Clinic/Clinical Research Advantage, Phoenix; Lynn Bessette, Central Phoenix Medical Clinic/Clinical Research Advantage, Phoenix; Gina Blackwell, Southern Arizona Veterans Admin. Health Care System (SAVAHCS), Tucson; Jennifer Burrows, Central Phoenix Medical Clinic/Clinical Research Advantage, Phoenix; Meghan Caldron, Central Phoenix Medical Clinic/Clinical Research Advantage, Phoenix; Meghan Caldron, Clinical Research Advantage, Inc./Lenzmeier Family Practice, Glendale; Chui-An Chang, Advanced Arizona Clinical Research, LLC, Tucson; Elizabeth Collins, Advanced Arizona Clinical Research, LLC, Tucson; Meli'sa Crawford, Central Phoenix Medical Clinic/Clinical Research Advantage, Phoenix; Katherine Delfin, Clinical Research Advantage, Inc./Lenzmeier Family Practice, Glendale; Jessie De'Loera, Southern Arizona Veterans Admin. Health Care System (SAVAHCS), Tucson; Betsy Dokken, University of Arizona Section of Endocrinology , Tucson; Lawrence Feld, Horizon Clinical Research Associates, Gilbert; Ryan Gill, Central Phoenix Medical Clinic/Clinical Research Advantage, Phoenix; James Gordon, Advanced Arizona Clinical Research, LLC, Tucson; Rachel Gordon, Advanced Arizona Clinical Research, LLC, Tucson; Nicole Gullick, Advanced Arizona Clinical Research, LLC, Tucson; Diane Gutierrez, Advanced Arizona Clinical Research, LLC, Tucson; Larissa Harrison, Central Phoenix Medical Clinic/Clinical Research Advantage, Phoenix; Annamarie Haught, Central Phoenix Medical Clinic/Clinical Research Advantage, Phoenix; Annamarie Haught, Clinical Research Advantage, Inc./Lenzmeier Family Practice, Glendale; Karin Hemmila, Central Phoenix Medical Clinic/Clinical Research Advantage, Phoenix; Darell Hendrickson, Advanced Arizona Clinical Research, LLC, Tucson; Craig Horsley, Advanced Arizona Clinical Research, LLC, Tucson; Connie Hsu, DCR-PI, PC, Goodyear; Maggie Jerrell, Clinical Research Advantage, Inc./Lenzmeier Family Practice, Glendale; Briana Kertesz, Clinical Research Advantage, Inc./Lenzmeier Family Practice, Glendale; Paulina Khananisho, Central Phoenix Medical Clinic/Clinical Research Advantage, Phoenix; Sonia Lenzmeier, Clinical Research Advantage, Inc./Lenzmeier Family Practice, Glendale; Thomas Lenzmeier, Clinical Research Advantage, Inc./Lenzmeier Family Practice, Glendale; Barbara Lipschitz, Central Phoenix Medical Clinic/Clinical Research Advantage, Phoenix; Mark Lonquist, DCR-PI, PC, Goodyear; Dana Mather, DCR-PI, PC, Goodyear; Michelene (Shelley) Miceli, Clinical Research Advantage, Inc./Lenzmeier Family Practice, Glendale; Gwenth Norris, University of Arizona Section of Endocrinology , Tucson; Ann Marie Padilla, Horizon Clinical Research Associates, Gilbert; Dena Petersen, Advanced Arizona Clinical Research, LLC, Tucson; Ernie Riffer, Central Phoenix Medical Clinic/Clinical Research Advantage, Phoenix; Susan Scott, DCR-PI, PC, Goodyear; Kathryn Sheridan, Central Phoenix Medical Clinic/Clinical Research Advantage, Phoenix; Misty Smith, Advanced Arizona Clinical Research, LLC, Tucson; Craig Stump, Southern Arizona Veterans Admin. Health Care System (SAVAHCS), Tucson; Craig Stump, University of Arizona Section of Endocrinology, Tucson; Stephen Thomson, Southern Arizona Veterans Admin. Health Care System (SAVAHCS), Tucson; Ernese Torok, DCR-PI, PC, Goodyear; Kelly Vesely, Central Phoenix Medical Clinic/Clinical Research Advantage, Phoenix; Tom Vincent, Southern Arizona Veterans Admin. Health Care

System (SAVAHCS), Tucson; Christy Wilson, Advanced Arizona Clinical Research, LLC, Tucson; Sandra Wilson, Advanced Arizona Clinical Research, LLC, Tucson.

*Arkansas:* Monica Agarwal, John L. McClellan Memorial Veterans Hospital, Little Rock; Kady Appleberry, Medical Investigations Inc., Little Rock; M. Gregg Barden, Searcy Medical Center, Searcy; Lorrie Brickell, Baptist Health Center for Clinical Research, Little Rock; Eric Bravo, Baptist Health Center for Clinical Research, Little Rock; Cady Cassis, Baptist Health Center for Clinical Research, Little Rock; Becky Covington, Searcy Medical Center, Searcy; De'Andrea Devine, Baptist Health Center for Clinical Research, Little Rock; Katherine Dishongh, John L. McClellan Memorial Veterans Hospital, Little Rock; Joseph Dugger, Searcy Medical Center, Searcy; Lauren Evans, Baptist Health Center for Clinical Research, Little Rock; Spencer Francis, Medical Investigations Inc., Little Rock; David Johnson, Searcy Medical Center, Searcy; Kalyana Koneru, Baptist Health Center for Clinical Research, Little Rock; Sheryl Kurck, Searcy Medical Center, Searcy; Chandra Lingisetty, Baptist Health Center for Clinical Research, Little Rock; Jennifer Menke, Baptist Health Center for Clinical Research, Little Rock; Beatrice Miller, Baptist Health Center for Clinical Research, Little Rock; Cristal Montgomery, Baptist Health Center for Clinical Research, Little Rock; Teresa Nimmo, Medical Investigations Inc., Little Rock; Daniel Pace, Searcy Medical Center, Searcy; Richard Pellegrino, Baptist Health Center for Clinical Research, Little Rock; Joseph Rose, Baptist Health Center for Clinical Research, Little Rock; Karl Straub, John L. McClellan Memorial Veterans Hospital, Little Rock; Amanda Stubbs, Medical Investigations Inc., Little Rock; Leslie Thomas, Baptist Health Center for Clinical Research, Little Rock; James Thrasher, Medical Investigations Inc., Little Rock; Lesa Thrasher, Medical Investigations Inc., Little Rock; Priyantha Wijewardane, Baptist Health Center for Clinical Research, Little Rock; Kimberly Williamson, Medical Investigations Inc., Little Rock.

*California:* Lizeth Acevedo, Desert Medical Group Inc., dba Desert Oasis Healthcare Medic, Palm Springs; Aakif Ahmad, Scripps Whittier Diabetes Institute, La Jolla; Teri Andresen, Desert Medical Group Inc., dba Desert Oasis Healthcare Medic, Palm Springs; Nancy Anderson-Berman, VA Long Beach Healthcare System, Long Beach; Etsegenet Ayele, Pacific Clinical Studies, Los Alamitos; Janice Baker, Arch Health Partners/Clinical Research Dept., Poway; Arlene Banares, Scripps Whittier Diabetes Institute, La Jolla; Thea Barsalou, Clinical Research Advantage, Inc. Cassidy Medical Group - Vista, Vista; Steven Becker, Pacific Clinical Studies, Los Alamitos; JoAnn Benavidez, Diabetes/Lipid Management & Research Center, Huntington Beach; Guadalupe Benitez, Desert Medical Group Inc., dba Desert Oasis Healthcare Medic, Palm Springs; Richard Bernstein, Marin Endocrine Care & Research, Inc., Greenbrae; Kala Bhasker, Clinical Research Advantage, Inc. Cassidy Medical Group - Vista, Vista; Arthur Blain, San Diego Family Care, San Diego; Joy Blustin, Facey Medical Foundation, Mission Hills; Stephanie Bughi, Rancho Los Amigos National Rehabilitation Center, Downey; Kimberly Carney, Precision Research Institute, Chula Vista; Gerardo Castro, Allianz Research Institute, Inc., Westminster; Jennifer Catangay, San Diego Family Care, San Diego; Joseph Chambers, Facey Medical Foundation, Mission Hills; Eve Chan, Diabetes/Lipid Management & Research Center, Huntington Beach; Amy Chang, Scripps Whittier Diabetes Institute, La Jolla; Anna Chang, John Muir Physician Network Clinical Research Center, Concord; Donald Chavous Jr, Desert Medical Group Inc., dba Desert Oasis Healthcare Medic, Palm Springs; Constance Chen, VA Long Beach Healthcare System, Long Beach; Ken Chiu, City of Hope National Medical Center, Duarte; Ronald Chochinov, Coastal Metabolic Research Center, Ventura; James Chu, Monterey Endocrine & Diabetes Institute, Inc., Monterey; Monica Cleghorn, Clinical Research Advantage, Inc. Cassidy Medical Group - Vista, Vista; Shariar Cohen-Gadol, Westlake Medical Research, Thousand Oaks; David Cokely, Coastal Metabolic Research Center, Ventura; Michelle Collins, Diabetes/Lipid Management & Research Center, Huntington Beach; Yolanda Collins, Chrishard Medical Group, Inglewood; Carissa Colomy, Coastal Metabolic Research Center, Ventura; Yolanda Cruz-Corona, Scripps Whittier Diabetes Institute, La Jolla; Virginia Cunnea, Pacific Clinical Studies, Los Alamitos; George Dailey, Scripps Whittier Diabetes Institute, La Jolla; Andy Dang, Facey



Medical Foundation, Mission Hills; Trinh Dang, Allianz Research Institute, Inc., Westminster; Mabel De La Luz, Facey Medical Foundation, Mission Hills; Rico Delgadillo, Chrishard Medical Group, Inglewood; Michael Delgado, Providence Clinical Research, North Hollywood; Taddese Desta, Precision Research Institute, Chula Vista; David Doriguzzi, First Valley Medical Group, Lancaster; Anthony Dulgeroff, High Desert Medical Group, Research for Life, Lancaster; Daniel Einhorn, Diabetes And Endocrine Associates, La Mesa; Pamela Emery, Arch Health Partners/Clinical Research Dept., Poway; Martin Figueroa, Desert Medical Group Inc., dba Desert Oasis Healthcare Medic, Palm Springs; Raymond Fink, Diabetes And Endocrine Associates, La Mesa; Chelsea Flowe, Valley Research, Fresno; Francesca Flowers, Desert Medical Group Inc., dba Desert Oasis Healthcare Medic, Palm Springs; Julie Fregosi, John Muir Physician Network Clinical Research Center, Concord; Gabriel Garcia, Coastal Metabolic Research Center, Ventura; Maria Garcia, Scripps Whittier Diabetes Institute, La Jolla; Linda Gaudiani, Marin Endocrine Care & Research, Inc., Greenbrae; Michael Gawad, Facey Medical Foundation, Mission Hills; Sam Ghattas, Chrishard Medical Group, Inglewood; Christine Gilroy, First Valley Medical Group, Lancaster; Viviana Gonzalez, Allianz Research Institute, Inc., Westminster; Yadira Gonzalez, Monterey Endocrine & Diabetes Institute, Inc., Monterey; Liliana Guadron-Hernandez, Facey Medical Foundation, Mission Hills; Thu Ha, San Diego Family Care, San Diego; Terry Haas, Clinical Research Advantage, Inc. Cassidy Medical Group - Vista, Vista; Judy Harbison, John Muir Physician Network Clinical Research Center, Concord; Graciela Hernandez, Coastal Metabolic Research Center, Ventura; Robert Hernandez, Facey Medical Foundation, Mission Hills; Nancy Herrera, Precision Research Institute, Chula Vista; Vincent Ho, High Desert Medical Group, Research for Life, Lancaster; Kang Hsu, Allianz Research Institute, Inc., Westminster; Denise Humphries, Diabetes And Endocrine Associates, La Mesa; Vincent Huynh, Providence Clinical Research, North Hollywood; Shahram Jacobs, Shahram Jacobs MD Inc., Sherman Oaks; Michael Jardula, Desert Medical Group Inc., dba Desert Oasis Healthcare Medic, Palm Springs; Cheryl Jarman, Arch Health Partners/Clinical Research Dept., Poway; Martin Kabongo, Precision Research Institute, Chula Vista; Hassan Kafri, Precision Research Institute, Chula Vista; Roy Kaplan, John Muir Physician Network Clinical Research Center, Concord; Grace Kim, Facey Medical Foundation, Mission Hills; Gary Kobayashi, Clinical Research Advantage, Inc. Cassidy Medical Group - Vista, Vista; Gary Korff, Clinical Research Advantage, Inc. Cassidy Medical Group - Vista, Vista; Alexandra Kowalick, Clinical Research Advantage, Inc. Cassidy Medical Group - Vista, Vista; Ellis Levin, VA Long Beach Healthcare System, Long Beach; Erin Lewis, First Valley Medical Group, Lancaster; Svetlana Lisovski, NorCal Endocrinology and Internal Medicine, San Ramon; Hieu Luu, Allianz Research Institute, Inc., Westminster; Daniel Malkhassian, Facey Medical Foundation, Mission Hills; Louis Maletz, Arch Health Partners/Clinical Research Dept., Poway; Geraldine Martinez, Catalina Research Inst LLC, Montclair; Gilbert Martinez, Catalina Research Inst LLC, Montclair; Salomon Martinez-Miss, Catalina Research Inst LLC, Montclair; James McCallum, Scripps Whittier Diabetes Institute, La Jolla; George Melikian, Providence Clinical Research, North Hollywood; Francine Metcalf, Pacific Clinical Studies, Los Alamitos; Bernard Michlin, Wetlin Research Associates, Inc., San Diego; Shira Michlin, Wetlin Research Associates, Inc., San Diego; Anitha Mitchell, Chrishard Medical Group, Inglewood; Ali Reza Moattari, Diabetes/Lipid Management & Research Center, Huntington Beach; Cynthia Montano-Pereira, Catalina Research Inst LLC, Montclair; Mia Moon, Catalina Research Inst LLC, Montclair; Bahar Naderi, Facey Medical Foundation, Mission Hills; Jenna Nagata, Providence Clinical Research, North Hollywood; Christopher Nguyen, Arch Health Partners/Clinical Research Dept., Poway; Paul Norwood, Valley Research, Fresno; Sagrario Olmos Garcia, Coastal Metabolic Research Center, Ventura; Sharon Olsen, Facey Medical Foundation, Mission Hills; Aarika Pardino, Desert Medical Group Inc., dba Desert Oasis Healthcare Medic, Palm Springs; Kathleen Parkes, Clinical Research Advantage, Inc. Cassidy Medical Group - Vista, Vista; Aileen Pascal, First Valley Medical Group, Lancaster; Mihir Patel, High Desert Medical Group, Research for Life, Lancaster; Carolyn Paulson, John Muir Physician Network Clinical Research Center, Concord; Kay Pernia, Allianz Research Institute, Inc., Westminster; Marisol Perez, Arch Health Partners/Clinical Research Dept., Poway; David Pham, Allianz Research Institute, Inc., Westminster; Athena Philis-Tsimikas, Scripps Whittier Diabetes Institute, La Jolla; Larry Presant, Arch Health Partners/Clinical

Research Dept., Poway; Krista Preston, Westlake Medical Research, Thousand Oaks; Laurie Reeves, Wetlin Research Associates, Inc., San Diego; Jessica Richards, Arch Health Partners/Clinical Research Dept., Poway; Jessica Rios-Santiago, Coastal Metabolic Research Center, Ventura; Joseph Risser, San Diego Family Care, San Diego; Silvia Rodriguez, Allianz Research Institute, Inc., Westminster; Rosario (Cherrie) Rosal, Scripps Whittier Diabetes Institute, La Jolla; Paul Rosenblit, Diabetes/Lipid Management & Research Center, Huntington Beach; Raquel Rosero, Clinical Research Advantage, Inc. Cassidy Medical Group - Vista, Vista; Chris Sadler, Diabetes And Endocrine Associates, La Mesa; Raynald Samoa, City of Hope National Medical Center, Duarte; Liliana Sanchez, Wetlin Research Associates, Inc., San Diego; Cynthia Schaeffer, Precision Research Institute, Chula Vista; Alan Schwartz, Helping Hands Medical Associates Inc., Santa Ana; Christopher Scott, Chrishard Medical Group, Inglewood; Courtney Scott, Chrishard Medical Group, Inglewood; Cranford Scott, Chrishard Medical Group, Inglewood; Jo-Ann Shartel, Scripps Whittier Diabetes Institute, La Jolla; Sylvia Shaw, Rancho Los Amigos National Rehabilitation Center, Downey; Yshay Shlesinger, NorCal Endocrinology and Internal Medicine, San Ramon; Kanagaratnam Sivalingam, First Valley Medical Group, Lancaster; Scott Sligh, Providence Clinical Research, North Hollywood; Teresa Sligh, Providence Clinical Research, North Hollywood; Bradley Smith, Desert Medical Group Inc., dba Desert Oasis Healthcare Medic, Palm Springs; Daniel Soler, Catalina Research Inst LLC, Montclair; Torre Spencer, Arch Health Partners/Clinical Research Dept., Poway; Sophia Stalters, John Muir Physician Network Clinical Research Center, Concord; Jenine Stone, San Diego Family Care, San Diego; Yaga Szlachcic, Rancho Los Amigos National Rehabilitation Center, Downey; Ashley Thorsell, Scripps Whittier Diabetes Institute, La Jolla; Zhongheng Tu, High Desert Medical Group, Research for Life, Lancaster; Jeffrey Unger, Catalina Research Inst LLC, Montclair; Teresa Vela, Scripps Whittier Diabetes Institute, La Jolla; Anita Walton, San Diego Family Care, San Diego; Jessica Whittle, Facey Medical Foundation, Mission Hills; Lou Ellen Wilson, Facey Medical Foundation, Mission Hills; Zandra Wing, Precision Research Institute, Chula Vista; Philippa Wright, John Muir Physician Network Clinical Research Center, Concord; Shannan Wyman, Desert Medical Group Inc., dba Desert Oasis Healthcare Medic, Palm Springs; Ni Yao, Diabetes/Lipid Management & Research Center, Huntington Beach; Douglas Zlock, John Muir Physician Network Clinical Research Center, Concord.

*Colorado:* Chelsea Baker, Denver Va Med Center, Denver; Robyn Bakkum, Clinical Research Advantage, Inc./ Colorado Springs Family Practice, Colorado Springs; C. David Bird, Clinical Research Advantage, Inc./ Colorado Springs Family Practice, Colorado Springs; Gwen Carangi, New West Physicians, PC, Golden; Kenneth Cohen, New West Physicians, PC, Golden; Kristen Daza-Taylor, Clinical Research Advantage, Inc./ Colorado Springs Family Practice, Colorado Springs; Amy Diesburg-Stanwood, Denver Va Med Center, Denver; Sara Douglass, Denver Va Med Center, Denver; Lani Finck, Clinical Research Advantage, Inc./ Colorado Springs Family Practice, Colorado Springs; Krisoula Karaboitis, Clinical Research Advantage, Inc./ Colorado Springs Family Practice, Colorado Springs; Howard Kerstein, Creekside Endocrine Associates, PC, Denver; Kurt Lesh, Clinical Research Advantage, Inc./ Colorado Springs Family Practice, Colorado Springs; Ryan Loesch, Denver Va Med Center, Denver; Lori McClure, Clinical Research Advantage, Inc./ Colorado Springs Family Practice, Colorado Springs; Max Nevarez, Clinical Research Advantage, Inc./ Colorado Springs Family Practice, Colorado Springs; Bristol Pavol, New West Physicians, PC, Golden; Neda Rasouli, Denver Va Med Center, Denver; Briana Rockler, Clinical Research Advantage, Inc./ Colorado Springs Family Practice, Colorado Springs; Rebecca Sanagorski, Denver Va Med Center, Denver; Royce Solano, Clinical Research Advantage, Inc./ Colorado Springs Family Practice, Colorado Springs; Chantal Underkofler, Denver Va Med Center, Denver; Rebecca Van Winkle, Clinical Research Advantage, Inc./ Colorado Springs Family Practice, Colorado Springs; Sarah Weiss, Clinical Research Advantage, Inc./ Colorado Springs Family Practice, Colorado Springs; Katherine White, Clinical Research Advantage, Inc./ Colorado Springs Family Practice, Colorado Springs; Patricia Wirtemberg, Clinical Research Advantage, Inc./ Colorado Springs Family Practice, Colorado Springs; Lida Zarrabi, Denver Va Med Center, Denver; Leonard Zemel, Creekside Endocrine Associates, PC, Denver.

*Connecticut:* George Barchini, Chase Medical Research LLC, Waterbury; Kimberly Casagni, Chase Medical Research LLC, Waterbury; Marie Elena Cordisco, Western Connecticut Medical Group Endocrine & Diabetes Cntr, Danbury; Amanda Davis, Chase Medical Research LLC, Waterbury; Bobbi Duffy-Hidalgo, Chase Medical Research LLC, Waterbury; Richard Huntley, Norwalk Medical Group, Norwalk; Donald McNicol, Norwalk Medical Group, Norwalk; Neil Miller, Chase Medical Research LLC, Waterbury; Margaret Mukwaya, Western Connecticut Medical Group Endocrine & Diabetes Cntr, Danbury; Patricia Northrup, Norwalk Medical Group, Norwalk; Jonathan Platt, Chase Medical Research LLC, Waterbury; Diane Rabideau, Chase Medical Research LLC, Waterbury; Pamela Randolph, Norwalk Medical Group, Norwalk; Suzanne Rose, Western Connecticut Medical Group Endocrine & Diabetes Cntr, Danbury; James Samuel, Norwalk Medical Group, Norwalk; Robert Savino, Western Connecticut Medical Group Endocrine & Diabetes Cntr, Danbury; Joseph Soufer, Chase Medical Research LLC, Waterbury; Carole Torello, Chase Medical Research LLC, Waterbury.

*Florida:* Azarel Abinader, Suncoast Research Group, LLC, Miami; Milagos Agosto, Jesscan Medical Research, Miami; Frank Aguirre, Reliable Clinical Research, LLC, Hialeah; Lori Alexander, St Johns Center For Clinical Research, Ponte Vedra; Orlando Almanza, Cardiovascular Medicine Associates, P.A., South Miami; Dalia Alvarez, International Research Associates, LLC, Miami; Muhammad Anees, Misal Khan MD FRCS (ED) P.A., Panama City; Keith Aqua, Zasa Clinical Research, Boynton Beach; Luz Arazo, University of Miami, Miami; Claudia Asberry, East Coast Institute for Research, LLC, Jacksonville; Alyssa Ashley, DCT-FMC, LLC Discovery Clinical Trials, Orlando; Tracy Balentine, Meridien Research, Bradenton; Melissa Barta, Zasa Clinical Research, Boynton Beach; Ivan Bertot, ALL Medical Research, LLC, Cooper City; Michelle Binns-Leon, M&O Clinical Research, LLC, Fort Lauderdale; Nora Borello, Progressive Medical Research, Port Orange; Janette Bostick, UF Health at the University of Florida, Gainesville; Loria Boucher, Progressive Medical Research, Port Orange; Dalton Braddy, George E. Platt, M.D., Green Cove Springs; Cristian Breton, International Research Associates, LLC, Miami; Bridgitte Broxton, East Coast Medical Associates Inc., Boca Raton; Deborah Burke, Innovative Research of W Florida Inc., Clearwater; Tania Cabiellas, International Research Associates, LLC, Miami; Juan Calderon, International Research Associates, LLC, Miami; Yamil Canaan, Jesscan Medical Research, Miami; Gustavo Canelon, International Research Associates, LLC, Miami; Jose Cardona, Indago Research & Health Center Inc., Hialeah; Sheila Castillo-Gonzalez, Zasa Clinical Research, Boynton Beach; Kenia Castro, Reliable Clinical Research, LLC, Hialeah; Jessica Chacon, Zasa Clinical Research, Boynton Beach; Louis Chaykin, Meridien Research, Bradenton; Joe Chehade, University of Florida, College of Medicine Jacksonville Division of Endocrinology, Diabetes and Metabolism, Jacksonville; Lara Church, St Johns Center For Clinical Research, Ponte Vedra; Lisa Cohen, Suncoast Clinical Research, Inc., New Port Richey; Erin Crews, East Coast Institute for Research, LLC, Jacksonville; Carol Cromer, Tampa Clinical Research, Tampa; Michael Cromer, Tampa Clinical Research, Tampa; Jorge Cuello, Cardiovascular Medicine Associates, P.A., South Miami; Kenneth Cusi, UF Health at the University of Florida, Gainesville; Karel de Leon, Cardiovascular Medicine Associates, P.A., South Miami; Edmund Delgado, DCT-FMC, LLC Discovery Clinical Trials, Orlando; Selma Delima, Suncoast Research Group, LLC, Miami; Janneral Denson, East Coast Medical Associates Inc., Boca Raton; Benjamin DeVries, Innovative Research of W Florida Inc., Clearwater; Maritza Diaz, Reliable Clinical Research, LLC, Hialeah; Beningo Digon, Progressive Medical Research, Port Orange; Michelle Dowell, Meridien Research, Bradenton; Kelly Dunn, Tampa Clinical Research, Tampa; Dickson Ellington, Suncoast Research Group, LLC, Miami; George Emerick, Zasa Clinical Research, Boynton Beach; Frances Encarnacion, Suncoast Clinical Research, Inc., New Port Richey; Leslie Ezell, Zasa Clinical Research, Boynton Beach; Ashley Fahmie, Suncoast Research Group, LLC, Miami; Noel Fernandez, Indago Research & Health Center Inc., Hialeah; Rommel Figueredo, Reliable Clinical Research, LLC, Hialeah; Patricia Flores, Suncoast Research Group, LLC, Miami; Juan Fonseca, Reliable Clinical Research, LLC, Hialeah; Alain Freeman, Jesscan Medical Research, Miami; Erica Freeman, Jesscan Medical Research, Miami; Juan Frias, Jesscan Medical Research, Miami; Lazaro Garcia, International Research Associates, LLC, Miami; Giovanni Geronilla, Indago Research & Health Center Inc., Hialeah; Maxine Hamilton, Maxine Hamilton PA; Fort Lauderdale; Rodolfo Hanabergh, Suncoast

Research Group, LLC, Miami; Lenita Hanson, Hanson Clinical Research Center, Port Charlotte; Kim Harris, George E. Platt, M.D., Green Cove Springs; Syed Hasan, Suncoast Clinical Research, Inc., New Port Richey; Mary Hendrick, Meridien Research, Bradenton; Melissa Hicks, Suncoast Clinical Research, Inc., New Port Richey; Lara Hoffman, ALL Medical Research, LLC, Cooper City; Antoniwa Holt, East Coast Institute for Research, LLC, Jacksonville; Antoniwa Holt, East Coast Institute for Research, LLC, Jacksonville; Rachel Hutchinson, DCT-FMC, LLC Discovery Clinical Trials, Orlando; Harold Iparraguirre, Jesscan Medical Research, Miami; Ania Janicka, Suncoast Clinical Research, Inc., New Port Richey; Richard Janovitz, DCT-FMC, LLC Discovery Clinical Trials, Orlando; Dawn Jones, Progressive Medical Research, Port Orange; Sarah Jones, Progressive Medical Research, Port Orange; Polina Kaplun, Zasa Clinical Research, Boynton Beach; Mirtha Kelijman, East Coast Medical Associates Inc., Boca Raton; Angela Kersey, Suncoast Clinical Research, Inc., New Port Richey; Ashraf Khan, Misal Khan MD FRCS (ED) P.A., Panama City; Misal Khan, Misal Khan MD FRCS (ED) P.A., Panama City; Gregory Kirk, Progressive Medical Research, Port Orange; Ada Konwai, University of Miami, Miami; Meghan Kovar, St Johns Center For Clinical Research, Ponte Vedra; Mark Kutner, Suncoast Research Group, LLC, Miami; Jimmy Lafaille, Zasa Clinical Research, Boynton Beach; Dana Leach, UF Health at the University of Florida, Gainesville; David Levenson, East Coast Medical Associates Inc., Boca Raton; Lorena Lewy-Alterbaum, ALL Medical Research, LLC, Cooper City; Timothy Light, Innovative Research of W Florida Inc., Clearwater; Margaret Lo, UF Health at the University of Florida, Gainesville; Lusiana Loman, Suncoast Clinical Research, Inc., New Port Richey; Sarah Long, UF Health at the University of Florida, Gainesville; Jeremy Love, George E. Platt, M.D., Green Cove Springs; Arelis Madera, Hanson Clinical Research Center, Port Charlotte; James Magee, East Coast Institute for Research, LLC, Jacksonville; Michelle Mallitz, Meridien Research, Bradenton; Farid Marquez, Indago Research & Health Center Inc., Hialeah; Richard Marshall, Progressive Medical Research, Port Orange; James Mary, ALL Medical Research, LLC, Cooper City; Janet Mateu, Reliable Clinical Research, LLC, Hialeah; Leanna McKenzie, Meridien Research, Bradenton; Rona McKenzie, M&O Clinical Research, LLC, Fort Lauderdale; Wilfred McKenzie, M&O Clinical Research, LLC, Fort Lauderdale; Reina Mendelson, Zasa Clinical Research, Boynton Beach; Janet Mendez, Suncoast Research Group, LLC, Miami; Ledis Merlos, Jesscan Medical Research, Miami; Jennifer Mierau, East Coast Medical Associates Inc., Boca Raton; Robert Miller, East Coast Institute for Research, LLC, Jacksonville; Bresta Miranda-Palma, University of Miami, Miami; Carla Montoya, ALL Medical Research, LLC, Cooper City; Eduardo Navarro, Suncoast Research Group, LLC, Miami; Christian Neller, Tampa Clinical Research, Tampa; Janette Nossa, UF Health at the University of Florida, Gainesville; Tracey Osborn, Innovative Research of W Florida Inc., Clearwater; Jan Parrillo, DCT-FMC, LLC Discovery Clinical Trials, Orlando; Bijal Patel, Tampa Clinical Research, Tampa; Jesus Penabad, Suncoast Clinical Research, Inc., New Port Richey; Gilberto Perez, Reliable Clinical Research, LLC, Hialeah; Daniel Pineda, Indago Research & Health Center Inc., Hialeah; Antonio Pinero-Pilona, Suncoast Clinical Research, Inc., New Port Richey; George Platt, George E. Platt, M.D., Green Cove Springs; Elfrida Prestwood, UF Health at the University of Florida, Gainesville; Luis Quintero, International Research Associates, LLC, Miami; Rodney Rengifo, Suncoast Research Group, LLC, Miami; Dannier Reyes, DL Research Solutions, Inc., Miami; Aolani Rivas, Suncoast Research Group, LLC, Miami; Mileydis Rivero, ALL Medical Research, LLC, Cooper City; Sonya Robinson, DCT-FMC, LLC Discovery Clinical Trials, Orlando; Dawn Robison, St Johns Center For Clinical Research, Ponte Vedra; Dalier Rodriguez, ALL Medical Research, LLC, Cooper City; Ivete Rodriguez, Indago Research & Health Center Inc., Hialeah; Toni Rodriguez, Maxine Hamilton PA; Fort Lauderdale; Cristobal Rosario, Suncoast Clinical Research, Inc., New Port Richey; Rebecca Rosenwasser, East Coast Institute for Research, LLC, Jacksonville; Rebecca Rosenwasser, East Coast Institute for Research, LLC, Jacksonville; Miguel Roura, East Coast Institute for Research, LLC, Jacksonville; Erich Schramm, St Johns Center For Clinical Research, Ponte Vedra; Rashi Schramm, St Johns Center For Clinical Research, Ponte Vedra; Laurie Schweppe, Meridien Research, Bradenton; Scott Segel, East Coast Institute for Research, LLC, Jacksonville; Maria Sepulveda, M&O Clinical Research, LLC, Fort Lauderdale; Lori Sheets, Innovative Research of W Florida Inc., Clearwater; Karen Shields, Zasa Clinical Research, Boynton Beach; Rita Sheridan, Hanson Clinical Research Center, Port Charlotte; Ricardo Silva, East Coast

Institute for Research, LLC, Jacksonville; Krystal Smith, Suncoast Clinical Research, Inc., New Port Richey; Meridith Smith, University of Florida, College of Medicine Jacksonville Division of Endocrinology, Diabetes and Metabolism, Jacksonville; Claudia Somerstein, Suncoast Research Group, LLC, Miami; Maria Solano, University of Miami, Miami; Manuel Suarez, DL Research Solutions, Inc., Miami; Omar Suarez, Indago Research & Health Center Inc., Hialeah; Rogelio Suarez, University of Miami, Miami; Victor Suarez, Indago Research & Health Center Inc., Hialeah; Senan Sultan, East Coast Institute for Research, LLC, Jacksonville; David Sutton, East Coast Institute for Research, LLC, Jacksonville; Istvan Szilagyi, East Coast Institute for Research, LLC, Jacksonville; Margaret Thorne, George E. Platt, M.D., Green Cove Springs; Stefano Travaglini, East Coast Institute for Research, LLC, Jacksonville; Miguel Trevino, Innovative Research of W Florida Inc., Clearwater; Oscar Uriarte, Jesscan Medical Research, Miami; Luis Vizcaino, ALL Medical Research, LLC, Cooper City; Khurram Wadud, East Coast Institute for Research, LLC, Jacksonville; Khurram Wadud, East Coast Institute for Research, LLC, Jacksonville; Kent Wehmeier, University of Florida, College of Medicine Jacksonville Division of Endocrinology, Diabetes and Metabolism, Jacksonville; Debra Weinstein, Zasa Clinical Research, Boynton Beach; Celeste Welch, Progressive Medical Research, Port Orange; Alexander White, Progressive Medical Research, Port Orange; Basil White, Progressive Medical Research, Port Orange; Tammy Williams, George E. Platt, M.D., Green Cove Springs; Cathi Williamson, St Johns Center For Clinical Research, Ponte Vedra; Lisa Zwick, East Coast Medical Associates Inc., Boca Raton.

*Georgia:* Cynthia Adams, Atlanta VA Medical Center, Decatur; David Arkin, Physicians Research Associates, LLC, Lawrenceville; Bruce Bode, Atlanta Diabetes Associates, Atlanta; Sheila Bonner, Meridian Clinical Research LLC, Savannah; Wes Bonner, Meridian Clinical Research LLC, Savannah; Danielle Bowen, Meridian Clinical Research LLC, Savannah; Brooke Bradley, Meridian Clinical Research LLC, Savannah; Paul Bradley, Meridian Clinical Research LLC, Savannah; Elizaebeth Brennan, Meridian Clinical Research LLC, Savannah; Cynthia Brown, Endocrine Research Solutions, Inc., Roswell; De'Aira Brown, Meridian Clinical Research LLC, Savannah; Elizabeth Burgess, Atlanta VA Medical Center, Decatur; Taryn Collett, Meridian Clinical Research LLC, Savannah; Jennifer Cook, Meridian Clinical Research LLC, Savannah; Steven Corse, Meridian Clinical Research LLC, Savannah; Kaitlyn Dukes, Atlanta Diabetes Associates, Atlanta; Jenna Durrence, Meridian Clinical Research LLC, Savannah; Robin Dutton, Meridian Clinical Research LLC, Savannah; Susie Estes, Endocrine Research Solutions, Inc., Roswell; Laura Falcone, Meridian Clinical Research LLC, Savannah; David Gaskin, Meridian Clinical Research LLC, Savannah; Katherine Gaskin, Meridian Clinical Research LLC, Savannah; Ketan Goswami, Physicians Research Associates, LLC, Lawrenceville; Mari Hart, Atlanta VA Medical Center, Decatur; Donni Jester, Endocrine Research Solutions, Inc., Roswell; Staci Kies, Atlanta Diabetes Associates, Atlanta; Abigail Leiker, Meridian Clinical Research LLC, Savannah; Peter Lu, Physicians Research Associates, LLC, Lawrenceville; Aparna Mahakala, Physicians Research Associates, LLC, Lawrenceville; Maxine Maher, Atlanta VA Medical Center, Decatur; Alan Miller, Alta Pharmaceutical Research Center, Dunwoody; Todd Miller, Alta Pharmaceutical Research Center, Dunwoody; Miguel Munoz, Endocrine Research Solutions, Inc., Roswell; Michele Musto, Meridian Clinical Research LLC, Savannah; Adeniyi Odugbesan, Physicians Research Associates, LLC, Lawrenceville; Darin Olson, Atlanta VA Medical Center, Decatur; Nicole Osborn, Meridian Clinical Research LLC, Savannah; Kerri Pace, Meridian Clinical Research LLC, Savannah; Gordana Pajkovic, Atlanta VA Medical Center, Decatur; Carolyn Paulus, Physicians Research Associates, LLC, Lawrenceville; Lawrence Phillips, Atlanta VA Medical Center, Decatur; William Reddick, Meridian Clinical Research LLC, Savannah; John Reed, Endocrine Research Solutions, Inc., Roswell; David Robertson, Atlanta Diabetes Associates, Atlanta; Shasta Rowe, Endocrine Research Solutions, Inc., Roswell; Barney Sadler, Meridian Clinical Research LLC, Savannah; Tabby Sapp, Endocrine Research Solutions, Inc., Roswell; Louise Savoye, Atlanta VA Medical Center, Decatur; David Shore, Physicians Research Associates, LLC, Lawrenceville; Susan Shuman, Meridian Clinical Research LLC, Savannah; Jessica Sittle, Meridian Clinical Research LLC, Savannah; Shana Standard, Meridian Clinical Research LLC,

Savannah; Jessica Tapia, Endocrine Research Solutions, Inc., Roswell; Karla Wardell, Physicians Research Associates, LLC, Lawrenceville; Amy Workman, Meridian Clinical Research LLC, Savannah.

*Hawaii:* Tabitha Carreira, East-West Medical Research Institute, Honolulu; David Fitz-Patrick, East-West Medical Research Institute, Honolulu; Vutheary Hean, East-West Medical Research Institute, Honolulu; April Limcolioc, East-West Medical Research Institute, Honolulu; Megan Nihei, East-West Medical Research Institute, Honolulu; Youngmee Park, East-West Medical Research Institute, Honolulu; Cindy Pau, East-West Medical Research Institute, Honolulu; Lindsey Shannon, East-West Medical Research Institute, Honolulu; Alanna Trotter, East-West Medical Research Institute, Honolulu; Sierra Williams, East-West Medical Research Institute, Honolulu.

*Idaho:* Tiffany Coughenour, Rocky Mountain Diabetes & Osteoporosis Ctr, PA, Idaho Falls; John Liljenquist, Rocky Mountain Diabetes & Osteoporosis Ctr, PA, Idaho Falls; Carl Vance, Rocky Mountain Diabetes & Osteoporosis Ctr, PA, Idaho Falls; Jonathan Williams, Rocky Mountain Diabetes & Osteoporosis Ctr, PA, Idaho Falls.

*Illinois:* Eva Agaiby, Clinical Investigation Specialists Inc. Gurnee; John Agaiby, Clinical Investigation Specialists Inc. Gurnee; Kelly Argo, HSHS Medical Group Diabetes Research, Springfield; Nasrin Azad, Hines VA Hospital, Hines; Arnetta Backus, HSHS Medical Group Diabetes Research, Springfield; Andrew Bartlett, PGM Research of Christie Clinic, Champaign; Jennifer Bellucci-Jackson, Clinical Investigation Specialists Inc. Gurnee; Otilia Boncu, Midwest CRC, Crystal Lake; Pamela Brodt, Springfield Clinic, Springfield; Hope Carlson, PGM Research of Christie Clinic, Champaign; Kathleen Collins, PGM Research of Christie Clinic, Champaign; Maja Delibasic, Mercy Hospital and Medical Center; Chicago; Isaac Dor, Clinical Investigation Specialists Inc. Gurnee; Mary Dukett, HSHS Medical Group Diabetes Research, Springfield; Nicholas Emanuele, Hines VA Hospital, Hines; Faith Gabel, PGM Research of Christie Clinic, Champaign; Alexandra Giardino, PGM Research of Christie Clinic, Champaign; David Hoelzer, Springfield Clinic, Springfield; Annming Hsieh, Hines VA Hospital, Hines; Poornima Jayaramaiah, HSHS Medical Group Diabetes Research, Springfield; Tracy Kearney, Mercy Hospital and Medical Center; Chicago; Kathleen Kelley, Biofortis Clinical Research, Addison; Jelena Kravarusic, Mercy Hospital and Medical Center; Chicago; Andrea Lawless, Biofortis Clinical Research, Addison; Hiralal Maheshwari, Midwest CRC, Crystal Lake; Elonia Martin, Mercy Hospital and Medical Center; Chicago; Linda McCall, HSHS Medical Group Diabetes Research, Springfield; Frank Mikell, HSHS Medical Group Diabetes Research, Springfield; Deepika Nallala, HSHS Medical Group Diabetes Research, Springfield; Sufyan Said, Springfield Clinic, Springfield; Nadia Sakla, Hines VA Hospital, Hines; Joanna Schiferi, Cedar-Crosse Research Center, Chicago; Patricia Smith, PGM Research of Christie Clinic, Champaign; John Stokes, PGM Research of Christie Clinic, Champaign; Danny Sugimoto, Cedar-Crosse Research Center, Chicago; Michael Sugimoto, Cedar-Crosse Research Center, Chicago; Delores Swan, Clinical Investigation Specialists Inc. Gurnee.

*Indiana:* Sarab Alfata, American Health Network of IN LLC, Muncie; Jill Beavins, American Health Network of IN LLC, Franklin; Christine Bogardus, American Health Network of IN LLC, Franklin; Donald Bogardus, American Health Network of IN LLC, Franklin; Brittany Calvert, MediSphere Medical Research Center, LLC, Evansville; Krystle Calvin, La Porte County Institute For Clinical Research, Michigan City; Kristin Carlton, American Health Network of Indiana, LLC, Greenfield; Jonathan Condit, American Health Network of IN LLC, Muncie; George Cornett, American Health Network of IN LLC, Franklin; Carissa Covert, MediSphere Medical Research Center, LLC, Evansville; Alexander Dela Llana, MediSphere Medical Research Center, LLC, Evansville; Rosie Dixon, MediSphere Medical Research Center, LLC, Evansville; Dean Felker, American Health Network of Indiana, LLC, Greenfield; Sara Fogle, American Health Network of IN LLC, Franklin; Leslie Harris, Investigators Research Group, LLC, Brownsburg; Roberta E. Hoebeke, MediSphere Medical Research Center, LLC, Evansville; Desirae

Hyde, American Health Network of IN LLC, Franklin; Tabitha Johnson, American Health Network of IN LLC, Franklin; Kelly Johnston, La Porte County Institute For Clinical Research, Michigan City; Jennifer King, La Porte County Institute For Clinical Research, Michigan City; Amber Lang, MediSphere Medical Research Center, LLC, Evansville; Kenneth Maynard, Investigators Research Group, LLC, Brownsburg; Vickie McDaniel, American Health Network of Indiana, LLC, Greenfield; Caitlin McGrath, American Health Network of Indiana, LLC, Greenfield; Thomas Moretto, American Health Network, Indianapolis; Ikeadi Ndukwu, La Porte County Institute For Clinical Research, Michigan City; Leo O'Connor, Investigators Research Group, LLC, Brownsburg; Thomas O'Connor, American Health Network of Indiana, LLC, Greenfield; Tonya Oliver, La Porte County Institute For Clinical Research, Michigan City; Stephanie Overmars, Investigators Research Group, LLC, Brownsburg; Minesh Patel, La Porte County Institute For Clinical Research, Michigan City; Geraldine Patterson, American Health Network of IN LLC, Muncie; Talessa Powell, American Health Network of Indiana, LLC, Greenfield; Annmarie Raphael, Investigators Research Group, LLC, Brownsburg; Rod Raphael, Investigators Research Group, LLC, Brownsburg; Mark Reedy, American Health Network of IN LLC, Muncie; Hubert S. Reyes, MediSphere Medical Research Center, LLC, Evansville; Terry Ridge, American Health Network, Indianapolis; Mary S. Rutherford, MediSphere Medical Research Center, LLC, Evansville; Mike Sebastian, MediSphere Medical Research Center, LLC, Evansville; Laura Shaeffer, American Health Network of IN LLC, Muncie; Michelle Sheets, La Porte County Institute For Clinical Research, Michigan City; Karen Thomas, American Health Network, Indianapolis; Nancy Trueblood, Investigators Research Group, LLC, Brownsburg; Tiffany Tucker, Investigators Research Group, LLC, Brownsburg; Adrian White, American Health Network of IN LLC, Muncie; Evan Wooldridge, American Health Network of IN LLC, Muncie; Alison Wright, American Health Network, Indianapolis; Dawn Zapinski, American Health Network of IN LLC, Franklin.

*Iowa:* Megan Cieloha, Clinical Research Advantage, Inc./Ridge Family Practice, Council Bluffs; Clarine Coker, Clinical Research Advantage, Inc./Ridge Family Practice, Council Bluffs; Cherisa Fletcher, West Broadway Clinic, Council Bluffs; Jennifer Kay, Clinical Research Advantage, Inc./Ridge Family Practice, Council Bluffs; Katelyn Larsen, Clinical Research Advantage, Inc./Ridge Family Practice, Council Bluffs; Isam Marar, West Broadway Clinic, Council Bluffs; Zachary Motz, Clinical Research Advantage, Inc./Ridge Family Practice, Council Bluffs; Jamie Paul, Clinical Research Advantage, Inc./Ridge Family Practice, Council Bluffs; Alan Pokorski, Clinical Research Advantage, Inc./Ridge Family Practice, Council Bluffs; Diana Rabadi-Marar, West Broadway Clinic, Council Bluffs; Kylie Scheideler, Clinical Research Advantage, Inc./Ridge Family Practice, Council Bluffs; Jill Sobczyk, Clinical Research Advantage, Inc./Ridge Family Practice, Council Bluffs; Kolbie Sweeney, Clinical Research Advantage, Inc./Ridge Family Practice, Council Bluffs.

*Kansas:* Nathalie Brink, Professional Research Network of Kansas LLC, Wichita; Dennis Buth, Professional Research Network of Kansas LLC, Wichita; Katlyn Grimes, Professional Research Network of Kansas LLC, Wichita; Gregory Lakin, Professional Research Network of Kansas LLC, Wichita; Barbara Loewen, Professional Research Network of Kansas LLC, Wichita; Neal Secrist, Professional Research Network of Kansas LLC, Wichita; William Simon, Professional Research Network of Kansas LLC, Wichita; Diane Steere, Professional Research Network of Kansas LLC, Wichita; Kimberly Talbot, Professional Research Network of Kansas LLC, Wichita; Christina Wheeler, Professional Research Network of Kansas LLC, Wichita.

*Kentucky:* Derick Adams, VA Medical Center, Lexington; Wilhelmina Armour, Baptist Health Clinical Studies, Madisonville; Whitney Asher, L-MARC Research Center, Louisville; Harold Bays, L-MARC Research Center, Louisville; Noreen Behl, L-MARC Research Center, Louisville; Brittany Conn, L-MARC Research Center, Louisville; Lyndsey Dye, VA Medical Center, Lexington; Jennifer Earl, Baptist Health Clinical Studies, Madisonville; Neil Farris, The Research Group of Lexington, LLC, Lexington; Sergio Figueroa, Baptist Health Clinical Studies, Madisonville; Olivia Fruit, L-MARC Research Center, Louisville; Coury Hobbs, L-

MARC Research Center, Louisville; Kristen Howard, Baptist Health Clinical Studies, Madisonville; Tamara Jackson, L-MARC Research Center, Louisville; Angela Kain, Robley Rex VA Medical Center, Louisville; Chrisi Karounos, VA Medical Center, Lexington; Dennis Karounos, VA Medical Center, Lexington; Sarah Keiran, L-MARC Research Center, Louisville; Ryan Kennedy, VA Medical Center, Lexington; Kara King, L-MARC Research Center, Louisville; Sathya Krishnasamy, Robley Rex VA Medical Center, Louisville; Winona Lambdin, Baptist Health Clinical Studies, Madisonville; Gezina Micklewright, L-MARC Research Center, Louisville; Sri Mokshagundam, Robley Rex VA Medical Center, Louisville; Stephen Mooney, The Research Group of Lexington, LLC, Lexington; Melanie Moore, L-MARC Research Center, Louisville; Denise Morgan, The Research Group of Lexington, LLC, Lexington; Robert Morley, The Research Group of Lexington, LLC, Lexington; Stacy Newsome, The Research Group of Lexington, LLC, Lexington; Jennifer Nichols, The Research Group of Lexington, LLC, Lexington; Diana Nims, Baptist Health Clinical Studies, Madisonville; Nichole Nockerts, L-MARC Research Center, Louisville; Ruth Oremus, VA Medical Center, Lexington; Barbara Michelle Ritchey, L-MARC Research Center, Louisville; Christina Shelton, L-MARC Research Center, Louisville; Danielle Smith, L-MARC Research Center, Louisville; Debra Walker, Robley Rex VA Medical Center, Louisville; Kathleen Weiter, L-MARC Research Center, Louisville; Rebecca Whitehead, L-MARC Research Center, Louisville; Robert Wood, Baptist Health Clinical Studies, Madisonville; Robin Woodruff, Baptist Health Clinical Studies, Madisonville; J. DeShay Young, L-MARC Research Center, Louisville.

*Louisiana:* Arnold Alper, New Orleans Center for Clinical Research, New Orleans; Martha Berry, Arthritis and Diabetes Clinic, Inc., Monroe; Nadine Gauthier, New Orleans Center for Clinical Research, New Orleans; Catina Griffin, New Orleans Center for Clinical Research, New Orleans; Elvia Haynes, New Orleans Center for Clinical Research, New Orleans; Jereta Lawrence, Arthritis and Diabetes Clinic, Inc., Monroe; Teraina (Terry) McCormack, New Orleans Center for Clinical Research, New Orleans; Catherine Midyett, Arthritis and Diabetes Clinic, Inc., Monroe; Uma Rangaraj, Arthritis and Diabetes Clinic, Inc., Monroe; William Smith, New Orleans Center for Clinical Research, New Orleans; Makenzie Stricker, New Orleans Center for Clinical Research, New Orleans; Ileana Tandron, Ileana J Tandron APMC, Slidell; Ramon Vargas, New Orleans Center for Clinical Research, New Orleans; Michele Wagner, Ileana J Tandron APMC, Slidell.

*Maine:* Marie Albert, Acadia Clinical Research, LLC, Bangor; Gail Baillargeon, Acadia Clinical Research, LLC, Bangor; John Stephens, Acadia Clinical Research, LLC, Bangor.

*Maryland:* Vanita Aroda, Medstar Research Institute, College Park; Michael Dempsey, Endocrine and Metabolic Consultants, Rockville; Herman Junker, Medstar Research Institute, College Park; Meyling Lopez, Endocrine and Metabolic Consultants, Rockville; Helena W. Rodbard, Endocrine and Metabolic Consultants, Rockville; Marc Shepard, Medstar Research Institute, College Park.

*Massachusetts:* Carol Ciccarelli, UMass Medical School, Worcester; Joycelyn Datu, Atlantic Clinical Trials, LLC, Watertown; Karen Gallagher-Dorval, UMass Medical School, Worcester; Celia Hartigan, UMass Medical School, Worcester; Edward Kowaloff, Atlantic Clinical Trials, LLC, Watertown; John-Paul Lock, UMass Medical School, Worcester; Nina Rosano, UMass Medical School, Worcester; Bernadette Shaw, UMass Medical School, Worcester; Michael Thompson, UMass Medical School, Worcester.

*Michigan:* Camerin Abbo, Arcturus Healthcare, PLC, Troy; Salwan Anton, Detroit Clinical Research Center, PC, Livonia; Lydia Baker, Northern Pines Health Center, PC, Buckley; Arti Bhan, Henry Ford Health System, Detroit; Karla Blackmer, Northern Pines Health Center, PC, Buckley; Bryon Boley, Westside Family



Medical Center, P.C., Kalamazoo; John Bonema, Arcturus Healthcare, PLC, Troy; Tamara Carlin, Arcturus Healthcare, PLC, Troy; Nancy Curran, Westside Family Medical Center, P.C., Kalamazoo; Bethani Dandois, Westside Family Medical Center, P.C., Kalamazoo; Abigail Dermeyer, Arcturus Healthcare, PLC, Troy; Janet Dubeck, Arcturus Healthcare, PLC, Troy; Jennifer Elkins, Arcturus Healthcare, PLC, Troy; Pamela Ferris, Westside Family Medical Center, P.C., Kalamazoo; Neil Fraser, Arcturus Healthcare, PLC, Troy; Julia Gargan Kozma, ClinSite LLC, Ann Arbor; David Gasparovich, Arcturus Healthcare, PLC, Troy; Robert Grodman, Detroit Clinical Research Center, PC, Livonia; Jaison Hampson, ClinSite LLC, Ann Arbor; Mitzie Hewitt, Northern Pines Health Center, PC, Buckley; Judy Hiatt, Westside Family Medical Center, P.C., Kalamazoo; Ashley Hopkins, Arcturus Healthcare, PLC, Troy; Jennifer Howard, ClinSite LLC, Ann Arbor; John Joliat, Arcturus Healthcare, PLC, Troy; Jonathan Joliat, Arcturus Healthcare, PLC, Troy; Steven Kalt, Arcturus Healthcare, PLC, Troy; Steven Katzman, Detroit Clinical Research Center, PC, Livonia; Jesse Kogelman, Northern Pines Health Center, PC, Buckley; Davida Kruger, Henry Ford Health System, Detroit; April Kurkowski, Northern Pines Health Center, PC, Buckley; Jodi Lambert, ClinSite LLC, Ann Arbor; Elisabeta Levcovici, Wayne State University/University Health Center, Detroit; Karen Lockwood, Arcturus Healthcare, PLC, Troy; Michael Lumberg, Arcturus Healthcare, PLC, Troy; Lindsay McMullen, ClinSite LLC, Ann Arbor; Peter Meyers, ClinSite LLC, Ann Arbor; Carrie Minto, Northern Pines Health Center, PC, Buckley; Tina Nelson, Westside Family Medical Center, P.C., Kalamazoo; Gregory Neuner, Arcturus Healthcare, PLC, Troy; Kevin Nurmi, Arcturus Healthcare, PLC, Troy; Judy Perkins, Arcturus Healthcare, PLC, Troy; Cynthia Plunkett, University of Michigan Metabolism Endocrinology and Diabetes, Ann Arbor; Rodica Pop-Busui, University of Michigan Metabolism Endocrinology and Diabetes, Ann Arbor; Gary Ruoff, Westside Family Medical Center, P.C., Kalamazoo; Julie Samantray, Wayne State University/University Health Center, Detroit; Ahmed Sawah, Wayne State University/University Health Center, Detroit; Samantha Secord, Westside Family Medical Center, P.C., Kalamazoo; Berhane Seyoum, Wayne State University/University Health Center, Detroit; Sarah Sherman, Northern Pines Health Center, PC, Buckley; Michael Simpson, Arcturus Healthcare, PLC, Troy; Mark Sinkoff, Arcturus Healthcare, PLC, Troy; Joseph Skoney, Arcturus Healthcare, PLC, Troy; Jami Small, Arcturus Healthcare, PLC, Troy; Heidi Szerlong, Northern Pines Health Center, PC, Buckley; Timothy Tinetti, Arcturus Healthcare, PLC, Troy; Adam Toomey, Westside Family Medical Center, P.C., Kalamazoo; Holly VanDerWerff, Arcturus Healthcare, PLC, Troy; Fred Whitehouse, Henry Ford Health System, Detroit; Raechelle Wilkins, Westside Family Medical Center, P.C., Kalamazoo; Stephanie Wolf, Northern Pines Health Center, PC, Buckley; Steven Yarows, ClinSite LLC, Ann Arbor.

*Mississippi:* Edward Eldred, Olive Branch Family Medical Center, Olive Branch; Kim Hester, Olive Branch Family Medical Center, Olive Branch; Randall Huling, Olive Branch Family Medical Center, Olive Branch; Kerry Moore, Olive Branch Family Medical Center, Olive Branch; Kristina Preslar, Olive Branch Family Medical Center, Olive Branch; Nakia Proge, Olive Branch Family Medical Center, Olive Branch; Lora Smith, Olive Branch Family Medical Center, Olive Branch; Gerri Young, Olive Branch Family Medical Center, Olive Branch.

*Missouri:* Kevin Bybee, Saint Luke's Hospital, Kansas City; George Carr, Jefferson City Medical Group, PC, Jefferson City; Christopher Case, Jefferson City Medical Group, PC, Jefferson City; Alan Forker, Saint Luke's Hospital, Kansas City; Lindsay Goeke, Healthcare Research Network, Hazelwood; Darlene Kocher, Saint Luke's Hospital, Kansas City; Oscar Lin, Healthcare Research Network, Hazelwood; James Littlefield, Healthcare Research Network, Hazelwood; Robinson Mendoza, Saint Luke's Hospital, Kansas City; Michelle Moore, Healthcare Research Network, Hazelwood; Barbara Oberhaus, Jefferson City Medical Group, PC, Jefferson City; Larry Reed, Healthcare Research Network, Hazelwood; Cheryl Rutherford, Saint Luke's Hospital, Kansas City; Brian Springer, Healthcare Research Network, Hazelwood; Sheryl Windsor, Saint Luke's Hospital, Kansas City.

*Montana:* Kim Ackerman, Billings Clinical Research Center, Billings; Reed Christensen, Billings Clinical Research Center, Billings; Jose De Souza, Glacier View Research Institute-Endocrinology, Kalispell; Kirsten Douglas, Billings Clinical Research Center, Billings; Therese Hrcirik, Billings Clinical Research Center, Billings; Magen Lefkowicz, Glacier View Research Institute-Endocrinology, Kalispell; Lindsey McDonnell, Billings Clinical Research Center, Billings; Larry Severa, Billings Clinical Research Center, Billings; Christopher Sorli, Billings Clinical Research Center, Billings; Jeffrey Tjaden, Glacier View Research Institute-Endocrinology, Kalispell; Laura Ward, Glacier View Research Institute-Endocrinology, Kalispell.

*Nebraska:* Shayla Addison, Clinical Research Advantage, Inc./Prairie Fields Family Med., Fremont; Shayla Addison, Clinical Research Advantage, Inc./Skyline Medical Center, PC, Elkhorn; Robert Anderson, Veterans Affairs Medical Center, Omaha; Claire Baker, Diabetes & Endocrine Associates PC, Omaha; Robert Baum, University of Nebraska Medical Center-Diabetes Center, Omaha; Jenny Belitz, Clinical Research Advantage, Inc./Prairie Fields Family Med., Fremont; Shannon Boerner, University of Nebraska Medical Center-Diabetes Center, Omaha; Cyrus Desouza, University of Nebraska Medical Center-Diabetes Center, Omaha; Cyrus Desouza, Veterans Affairs Medical Center, Omaha; Andjela Drincic, University of Nebraska Medical Center-Diabetes Center, Omaha; William Fitzgibbons, Clinical Research Advantage, Inc./Skyline Medical Center, PC, Elkhorn; Jessica Francis, Clinical Research Advantage, Inc./Prairie Fields Family Med., Fremont; Maureen Garvin, University of Nebraska Medical Center-Diabetes Center, Omaha; Whitney Goldner, University of Nebraska Medical Center-Diabetes Center, Omaha; Melissa Goodrich, Clinical Research Advantage, Inc./Prairie Fields Family Med., Fremont; Melissa Goodrich, Clinical Research Advantage, Inc./Skyline Medical Center, PC, Elkhorn; Melissa Goodrich, Southwest Family Physicians, PC/Clinical Research Advantage, Omaha; Lisa Grubbs, Clinical Research Advantage, Inc./Prairie Fields Family Med., Fremont; Theresa Hatcher, Clinical Research Advantage, Inc./Skyline Medical Center, PC, Elkhorn; Renee Hochstein, Clinical Research Advantage, Inc./Prairie Fields Family Med., Fremont; Christine Hunter, Southwest Family Physicians, PC/Clinical Research Advantage, Omaha; Janet Keuchel, Diabetes & Endocrine Associates PC, Omaha; Sarah Konigsberg, Diabetes & Endocrine Associates PC, Omaha; Lisa Kuechenmeister, University of Nebraska Medical Center-Diabetes Center, Omaha; Lisa Kuechenmeister, Veterans Affairs Medical Center, Omaha; Lynn Mack, University of Nebraska Medical Center-Diabetes Center, Omaha; Thomas McKnight, Clinical Research Advantage, Inc./Prairie Fields Family Med., Fremont; Hanna Mensik, Clinical Research Advantage, Inc./Prairie Fields Family Med., Fremont; Jan Mitchell, Clinical Research Advantage, Inc./Skyline Medical Center, PC, Elkhorn; Janice Mitchell, Southwest Family Physicians, PC/Clinical Research Advantage, Omaha; Jennifer Moeller, University of Nebraska Medical Center-Diabetes Center, Omaha; Edward Montanez, Clinical Research Advantage, Inc./Skyline Medical Center, PC, Elkhorn; Paul Montoya, Clinical Research Advantage, Inc./Prairie Fields Family Med., Fremont; Zachary Motz, Southwest Family Physicians, PC/Clinical Research Advantage, Omaha; Tiffany Nemecek, Clinical Research Advantage, Inc./Skyline Medical Center, PC, Elkhorn; Amy Neumeister, University of Nebraska Medical Center-Diabetes Center, Omaha; Jefferey Newcomb, University of Nebraska Medical Center-Diabetes Center, Omaha; Jamie Paul, Clinical Research Advantage, Inc./Prairie Fields Family Med., Fremont; Jamie Paul, Clinical Research Advantage, Inc./Skyline Medical Center, PC, Elkhorn; Jamie Paul, Southwest Family Physicians, PC/Clinical Research Advantage, Omaha; Shelby Pracht, University of Nebraska Medical Center-Diabetes Center, Omaha; Kaitlin Radke, Clinical Research Advantage, Inc./Prairie Fields Family Med., Fremont; Kaitlin Radke, Clinical Research Advantage, Inc./Skyline Medical Center, PC, Elkhorn; Jennifer Rahman, Diabetes & Endocrine Associates PC, Omaha; Samantha Renter, Clinical Research Advantage, Inc./Prairie Fields Family Med., Fremont; Jill Reynolds, Southwest Family Physicians, PC/Clinical Research Advantage, Omaha; Maria Grace Rodriguez, University of Nebraska Medical Center-Diabetes Center, Omaha; Jessica Satorie, Southwest Family Physicians, PC/Clinical Research Advantage, Omaha; Kylie Scheideler, Southwest Family Physicians, PC/Clinical Research Advantage, Omaha; Lynnnda Schiermann, Clinical Research Advantage, Inc./Prairie Fields Family Med., Fremont; Megan Severson, University of Nebraska Medical Center-Diabetes Center, Omaha; Vijay Shivaswamy, University of Nebraska Medical Center-Diabetes Center,

Omaha; Vijay Shivaswamy, Veterans Affairs Medical Center, Omaha; Janice Snyder, Diabetes & Endocrine Associates PC, Omaha; Renee Tillson, University of Nebraska Medical Center-Diabetes Center, Omaha; Andrew Vasey, University of Nebraska Medical Center-Diabetes Center, Omaha; Timothy Wahl, Diabetes & Endocrine Associates PC, Omaha; William Weeks, Southwest Family Physicians, PC/Clinical Research Advantage, Omaha; Thomas Wolf, Clinical Research Advantage, Inc./Prairie Fields Family Med., Fremont; Mark Woodruff, Southwest Family Physicians, PC/Clinical Research Advantage, Omaha.

*Nevada:* Isis Alvarez, Alas Science Clinical Research, Las Vegas; Vanessa Avila, Clinical Research Advantage, Inc., Las Vegas; Rachel Bowers, Palm Research Center Inc., Las Vegas; Franklin Cala-Anaya, Alas Science Clinical Research, Las Vegas; Rudiber Castellanos-Rodriguez, Alas Science Clinical Research, Las Vegas; Janice Christopher, Clinical Research Advantage, Inc., Las Vegas; Gelvis Concepcion, Alas Science Clinical Research, Las Vegas; Erick Evensen, Alas Science Clinical Research, Las Vegas; Dareana Fernandez, Alas Science Clinical Research, Las Vegas; Paula Ghanem, Clinical Research Advantage, Inc., Las Vegas; Nicolette Harmon, Clinical Research Advantage, Inc., Las Vegas; Heather Kaiser, Clinical Research Advantage, Inc., Las Vegas; Westbrook Kaplan, Alas Science Clinical Research, Las Vegas; Serena Klugh, Palm Research Center Inc., Las Vegas; Nicholas Le, Alas Science Clinical Research, Las Vegas; Stephanie Lehrner, Clinical Research Advantage, Inc., Las Vegas; Robert Lopez, Alas Science Clinical Research, Las Vegas; Olga Martin, Alas Science Clinical Research, Las Vegas; Tina Martinez, Clinical Research Advantage, Inc., Las Vegas; Nicole Martini, Clinical Research Advantage, Inc., Las Vegas; Clifford Molin, Clinical Research Advantage, Inc., Las Vegas; Samer Nakhle, Palm Research Center Inc., Las Vegas; Yvonne Newsome, Clinical Research Advantage, Inc., Las Vegas; Ellen Neylon, Palm Research Center Inc., Las Vegas; Jarvis Olsen, Clinical Research Advantage, Inc., Las Vegas; Betsy Palal, Palm Research Center Inc., Las Vegas; Peter Philander, Clinical Research Advantage, Inc., Las Vegas; Adriana Ruiz Rosario, Palm Research Center Inc., Las Vegas; Rubin Saavedra, Alas Science Clinical Research, Las Vegas; Mary Sanchez, Clinical Research Advantage, Inc., Las Vegas; Miguel Sierra-Garcia, Alas Science Clinical Research, Las Vegas; Myesha Smith, Clinical Research Advantage, Inc., Las Vegas; Samuel Trenche, Alas Science Clinical Research, Las Vegas; Danna Trippi, Alas Science Clinical Research, Las Vegas; Nicholas Verneti, Palm Research Center Inc., Las Vegas; Laura Villegas, Palm Research Center Inc., Las Vegas; Briana White, Clinical Research Advantage, Inc., Las Vegas; Simmon Wilcox, Alas Science Clinical Research, Las Vegas.

*New Hampshire:* Lisa Carmolli-Cornette, Southern New Hampshire Diabetes and Endocrinology, Nashua; Ellie Chuang, Southern New Hampshire Diabetes and Endocrinology, Nashua; Sheila Hoffman, Southern New Hampshire Diabetes and Endocrinology, Nashua; Alison Laliberte, Southern New Hampshire Diabetes and Endocrinology, Nashua; Lisa Marshall, Southern New Hampshire Diabetes and Endocrinology, Nashua; Pamela Meroski, Southern New Hampshire Diabetes and Endocrinology, Nashua; Christine O'Neil, Southern New Hampshire Diabetes and Endocrinology, Nashua; Jeanette Shippey, Southern New Hampshire Diabetes and Endocrinology, Nashua; Robert Silver, Southern New Hampshire Diabetes and Endocrinology, Nashua; Linda Spector, Southern New Hampshire Diabetes and Endocrinology, Nashua.

*New Jersey:* Jenny Cam, CarePoint Health Research Institute, Hoboken; Tina Chen, UniMed Center, East Brunswick; Jagadish Damle, CarePoint Health Research Institute, Hoboken; Rebecca Holman, UniMed Center, East Brunswick; Jenny Liu, UniMed Center, East Brunswick; Carmelo Milazzo, CarePoint Health Research Institute, Hoboken; Brenda Quach, UniMed Center, East Brunswick; Bin Yang, UniMed Center, East Brunswick.

*New York:* Basharat Ahmad, DiGiovanna Institute for Medical Education & Research, North Massapequa; Dominic Aro, Mid Hudson Medical Research, PLLC, New Windsor; Fouzal Azeem, DiGiovanna Institute for Medical Education & Research, North Massapequa; Antoinette Bonaccorso, Icahn School of Medicine, Mount Sinai Diabetes Center, New York; Lenore Brancato, NYU Langone Rheumatology Associates Long Island, Lake Success; Donald Brautigam, Great Lakes

Medical Research, Westfield; Robert Busch, Albany Medical College, Division of Community Endocrinology, Albany; Seth Charatz, Endocrine-Diabetes Resource Center, Rochester; June Chiarot, Great Lakes Medical Research, Westfield; Linda Cunningham, Southgate Medical Group, LLP, West Seneca; Nancy DiCerbo, Albany Medical College, Division of Community Endocrinology, Albany; Michael DiGiovanna, DiGiovanna Institute for Medical Education & Research, North Massapequa; Dawn Dluge-Aungst, Albany Medical College, Division of Community Endocrinology, Albany; Traci Dolbeer, Mid Hudson Medical Research, PLLC, New Windsor; Daniel Donovan, Icahn School of Medicine, Mount Sinai Diabetes Center, New York; Carol Duma, Albany Medical College, Division of Community Endocrinology, Albany; Rebecca Ellwood, Albany Medical College, Division of Community Endocrinology, Albany; Zachary Freedman, Endocrine-Diabetes Resource Center, Rochester; Timothy Gorman, Great Lakes Medical Research, Westfield; David Gunther, Southgate Medical Group, LLP, West Seneca; Eileen Hogan, Albany Medical College, Division of Community Endocrinology, Albany; Lisa Hoffman, Southgate Medical Group, LLP, West Seneca; Anoop Kapoor, Northport VA Medical Center, Northport; Michelle Kelly, Endocrine-Diabetes Resource Center, Rochester; Timothy Kitchen, Great Lakes Medical Research, Westfield; David Lam, Icahn School of Medicine, Mount Sinai Diabetes Center, New York; Camilla Levister, Icahn School of Medicine, Mount Sinai Diabetes Center, New York; Carol Levy, Icahn School of Medicine, Mount Sinai Diabetes Center, New York; Carlos Lopez, Icahn School of Medicine, Mount Sinai Diabetes Center, New York; Jane Lyons-Patterson, Endocrine-Diabetes Resource Center, Rochester; Sashi Makam, Mid Hudson Medical Research, PLLC, New Windsor; Diana Mauceri, Northport VA Medical Center, Northport; Carole McClary, Endocrine-Diabetes Resource Center, Rochester; Daniel Murak, Southgate Medical Group, LLP, West Seneca; Kelly Nolan, Endocrine-Diabetes Resource Center, Rochester; Carlos Nunez, Northport VA Medical Center, Northport; Theresa Ohlson Elliott, Southgate Medical Group, LLP, West Seneca; Phillip Ostrowski, Southgate Medical Group, LLP, West Seneca; Ajish Pallai, DiGiovanna Institute for Medical Education & Research, North Massapequa; Spencer Phelps, Albany Medical College, Division of Community Endocrinology, Albany; Andrew Porges, NYU Langone Rheumatology Associates Long Island, Lake Success; Alfredo Rodes, Southgate Medical Group, LLP, West Seneca; Richard Rosenberg, Icahn School of Medicine, Mount Sinai Diabetes Center, New York; Lance Rubel, NYU Langone Rheumatology Associates Long Island, Lake Success; Lelanie Serrano, Endocrine-Diabetes Resource Center, Rochester; Daniel Shannon, Albany Medical College, Division of Community Endocrinology, Albany; Rabi Sinha, Mid Hudson Medical Research, PLLC, New Windsor; Brian Snyder, Southgate Medical Group, LLP, West Seneca; Claude Sy, Southgate Medical Group, LLP, West Seneca; Rocky Tang, Icahn School of Medicine, Mount Sinai Diabetes Center, New York; Raghupathy Varavenkataraman, Southgate Medical Group, LLP, West Seneca; Amy Winterberger, Endocrine-Diabetes Resource Center, Rochester.

*North Carolina:* Stacy Allen, Whiteville Medical Associates, PA, Whiteville; Marshall Anderson, Kernodle Clinic Depart of the Private Diagnostic Clinic PLLC, Burlington; Mark Asbill, PMG Research of Charlotte, Charlotte; Amanda Beasley, On Site Clinical Solutions, LLC, Lexington; Christian Bennett, University of North Carolina, UNC Diabetes Care Center, Chapel Hill; Katherine Bergamo, University of North Carolina, UNC Diabetes Care Center, Chapel Hill; Scott Bilbro, PMG Research of Raleigh, LLC d/b/a PMG Research of Cary, Cary; Sarah Brannock, PMG Research of Winston-Salem, Winston-Salem; Laura Brown, PMG Research of Raleigh, LLC d/b/a PMG Research of Cary, Cary; Danielle Bryant, Physician's East Endocrinology, Greenville; Genena Buck, Physician's East Endocrinology, Greenville; Tara Burdette, Clinical Study Center of Asheville LLC, Asheville; John Buse, University of North Carolina, UNC Diabetes Care Center, Chapel Hill; Laura Butler, PMG Research of Charlotte, Charlotte; Ronald Caldwell, Clinical Study Center of Asheville LLC, Asheville; Daniel Cannon, Clinical Study Center of Asheville LLC, Asheville; Kevin Cannon, PMG Research of Wilmington, LLC, Wilmington; Casey Carter, Diabetes and Endocrinology Consultants, PC, Morehead City; Amanda Cherry, Physician's East Endocrinology, Greenville; Zoe Comer, PMG Research of Charlotte, Charlotte; Susan Crittenden, PMG Research of Raleigh, LLC d/b/a PMG Research of Cary, Cary; Juanita Cuffee, University of North Carolina, UNC Diabetes Care Center, Chapel Hill; Dawn Culmer, University of North Carolina, UNC Diabetes Care Center, Chapel Hill; Kristie Daly-Barnes, Physician's East Endocrinology,

Greenville; John Dean, Clinical Study Center of Asheville LLC, Asheville; Milana Dezube, University of North Carolina, UNC Diabetes Care Center, Chapel Hill; Jaime Diner, University of North Carolina, UNC Diabetes Care Center, Chapel Hill; Regina Dodis, Physician's East Endocrinology, Greenville; Jean Dostou, University of North Carolina, UNC Diabetes Care Center, Chapel Hill; Michelle Duclos, University of North Carolina, UNC Diabetes Care Center, Chapel Hill; Miles Elmore, Clinical Study Center of Asheville LLC, Asheville; Kristin Ferree, Diabetes and Endocrinology Consultants, PC, Morehead City; Leslie Foster, Kernodle Clinic Depart of the Private Diagnostic Clinic PLLC, Burlington; Gail Fuller, University of North Carolina, UNC Diabetes Care Center, Chapel Hill; Susan Garner, Piedmont Healthcare/Research, Statesville; Sarah Godwin, Physician's East Endocrinology, Greenville; April Goley, University of North Carolina, UNC Diabetes Care Center, Chapel Hill; Whitney Gore, PMG Research of Charlotte, Charlotte; Brenda Green, PMG Research of Raleigh, LLC d/b/a PMG Research of Cary, Cary; Elizabeth Harris, University of North Carolina, UNC Diabetes Care Center, Chapel Hill; Joy Harris, PMG Research of Raleigh, LLC d/b/a PMG Research of Cary, Cary; Rebecca Harris, Diabetes and Endocrinology Consultants, PC, Morehead City; Roger Hatharasinghe, Piedmont Healthcare/Research, Statesville; Charles Herring, PMG Research of Wilmington, LLC, Wilmington; Chernessa Hill, PMG Research of Raleigh, LLC d/b/a PMG Research of Cary, Cary; Robert Holmes, PMG Research of Winston-Salem, Winston-Salem; Erin Hutchens, Piedmont Healthcare/Research, Statesville; Stuart Jennings, Eastern Nephrology Associates, PLLC, New Bern; Ashley Kaake, Mountain Diabetes & Endocrine Center, Asheville; Handan Kaygun, University of North Carolina, UNC Diabetes Care Center, Chapel Hill; Marian Sue Kirkman, University of North Carolina, UNC Diabetes Care Center, Chapel Hill; Heather Kretzschmar, PMG Research of Raleigh, LLC d/b/a PMG Research of Cary, Cary; Wendy Lane, Mountain Diabetes & Endocrine Center, Asheville; Jaqueline Lang, Clinical Study Center of Asheville LLC, Asheville; Joseph Largay, University of North Carolina, UNC Diabetes Care Center, Chapel Hill; Melissa Lewis, Physician's East Endocrinology, Greenville; Maria Ann Long, Kernodle Clinic Depart of the Private Diagnostic Clinic PLLC, Burlington; Kathryn Lucas, Diabetes and Endocrinology Consultants, PC, Morehead City; Roshanda McCall, PMG Research of Raleigh, LLC d/b/a PMG Research of Cary, Cary; Catrina McDaniel, PMG Research of Winston-Salem, Winston-Salem; Lee Ann McGinnis, PMG Research of Wilmington, LLC, Wilmington; Edward Mogabgab, PMG Research of Charlotte, Charlotte; Manuel Montero, Eastern Nephrology Associates, PLLC, New Bern; Richard Montgomery, On Site Clinical Solutions, LLC, Lexington; Joseph Moran, Piedmont Healthcare/Research, Statesville; Katie Morgan, Kernodle Clinic Depart of the Private Diagnostic Clinic PLLC, Burlington; Taylor Motley, On Site Clinical Solutions, LLC, Lexington; Mahendra Narendran, Piedmont Healthcare/Research, Statesville; Brooke Narron, Diabetes and Endocrinology Consultants, PC, Morehead City; Walter Newman, Eastern Nephrology Associates, PLLC, New Bern; John Nicholson, Piedmont Healthcare/Research, Statesville; Stephanie Norris, PMG Research of Charlotte, Charlotte; Jennifer Norton, PMG Research of Charlotte, Charlotte; Erin Nowell, PMG Research of Raleigh, LLC d/b/a PMG Research of Cary, Cary; Heather O'Brien, Physician's East Endocrinology, Greenville; Heydin Otero, Clinical Study Center of Asheville LLC, Asheville; Victoria Perkins, Physician's East Endocrinology, Greenville; Reyna Quesada, On Site Clinical Solutions, LLC, Lexington; George Raad, PMG Research of Charlotte, Charlotte; Rosalie Raley, PMG Research of Raleigh, LLC d/b/a PMG Research of Cary, Cary; Sujatha Raman, PMG Research of Raleigh, LLC d/b/a PMG Research of Cary, Cary; Jonathan Rappaport, Mountain Diabetes & Endocrine Center, Asheville; Robert Ray, Whiteville Medical Associates, PA, Whiteville; Shannon Ray, Whiteville Medical Associates, PA, Whiteville; Lucian Rice, Clinical Study Center of Asheville LLC, Asheville; Christine Roberts, On Site Clinical Solutions, LLC, Lexington; Kaylee Ross, On Site Clinical Solutions, LLC, Lexington; Erica Scanlon, PMG Research of Wilmington, LLC, Wilmington; Derek Schroder, PMG Research of Raleigh, LLC d/b/a PMG Research of Cary, Cary; Michelle Schulte, PMG Research of Wilmington, LLC, Wilmington; Richard Schultzaberger, Physician's East Endocrinology, Greenville; Sylvia Shoffner, PMG Research of Raleigh, LLC d/b/a PMG Research of Cary, Cary; Michael Skrzynski, Mountain Diabetes & Endocrine Center, Asheville; Brian Smith, PMG Research of Winston-Salem, Winston-Salem; Holly Smith, PMG Research of Winston-Salem, Winston-Salem; Jennifer Smith, Physician's East Endocrinology, Greenville; Justin Smith,

Diabetes and Endocrinology Consultants, PC, Morehead City; Kendall Smith, PMG Research of Raleigh, LLC d/b/a PMG Research of Cary, Cary; Leigh Smith, PMG Research of Charlotte, Charlotte; Jeffrey Sparks, Kernodle Clinic Depart of the Private Diagnostic Clinic PLLC, Burlington; Jessica Speece, PMG Research of Winston-Salem, Winston-Salem; Jessica Spivey, On Site Clinical Solutions, LLC, Lexington; Andrew Stebich, PMG Research of Winston-Salem, Winston-Salem; Karen Temple, Kernodle Clinic Depart of the Private Diagnostic Clinic PLLC, Burlington; Boryana Tessena, PMG Research of Raleigh, LLC d/b/a PMG Research of Cary, Cary; Casey Thompson, Physician's East Endocrinology, Greenville; Henry Traylor, Whiteville Medical Associates, PA, Whiteville; Juliana Turner, Clinical Study Center of Asheville LLC, Asheville; Sh-Rhonda Turner, PMG Research of Charlotte, Charlotte; Martin Van Cleeff, PMG Research of Raleigh, LLC d/b/a PMG Research of Cary, Cary; Katarina Vukojicic, University of North Carolina, UNC Diabetes Care Center, Chapel Hill; Leslie Wanchick, PMG Research of Winston-Salem, Winston-Salem; Mark Warren, Physician's East Endocrinology, Greenville; Stephen Weinrib, Mountain Diabetes & Endocrine Center, Asheville; Devorah Werner, PMG Research of Charlotte, Charlotte; Candace Wishon, Eastern Nephrology Associates, PLLC, New Bern; Jonathan Wilson, PMG Research of Winston-Salem, Winston-Salem; Stephanie Wilson, On Site Clinical Solutions, LLC, Lexington; Heather Wright, PMG Research of Charlotte, Charlotte; Laura Young, University of North Carolina, UNC Diabetes Care Center, Chapel Hill.

*North Dakota:* Jamie Brown, Lillestol Research LLC, Fargo; Michael Lillestol, Lillestol Research LLC, Fargo.

*Ohio:* Mary Jo Allen, Cleveland Clinic, Ohio; Bruce Barker, Delaware Research Group, LLC, Delaware; Gary Bedel, Prestige Clinical Research, Frankllin; Shawn Beuerlein, Optimed Research, LTD, Columbus; Amar Bhati, Sentral Clinical Research Services, Cincinnati; Nicole Breslaw, Cleveland Clinic, Ohio; April Brown, Advanced Medical Research, Maumee; Cynthia Brown, Sentral Clinical Research Services, Cincinnati; Brian Burtch, Your Diabetes Endocrine Nutrition Group, Inc., Mentor; Ellen Check, Louis Stokes Cleveland VA Medical Center, Cleveland; Shawnie Chiodi, Sentral Clinical Research Services, Cincinnati; Linda Colosimo, Louis Stokes Cleveland VA Medical Center, Cleveland; Kathie Cope, Daniel G Williams MD, Perrysburg; Denise Coressel, Daniel G Williams MD, Perrysburg; Bethany Cramer, Louis Stokes Cleveland VA Medical Center, Cleveland; Amy Crowel, Advanced Medical Research, Maumee; Nizar Daboul, Advanced Medical Research, Maumee; Rebecca DeLong, Sentral Clinical Research Services, Cincinnati; William Dirkes, Sentral Clinical Research Services, Cincinnati; Zia Farooki, Optimed Research, LTD, Columbus; Don Fixler, Sentral Clinical Research Services, Cincinnati; Linda Friedhof, Sentral Clinical Research Services, Cincinnati; Julie Griffen, Prestige Clinical Research, Frankllin; Anjani Hagan, Louis Stokes Cleveland VA Medical Center, Cleveland; Kevin Haney, Delaware Research Group, LLC, Delaware; Kira Harris, Optimed Research, LTD, Columbus; Amanda Hoffmann, Advanced Medical Research, Maumee; Ronald Hsieh, Sentral Clinical Research Services, Cincinnati; Famaraz Ismail-Beigi, Louis Stokes Cleveland VA Medical Center, Cleveland; Kim Kelso, Sentral Clinical Research Services, Cincinnati; Nidaa Khamousia, Advanced Medical Research, Maumee; Gerald Kremer, Delaware Research Group, LLC, Delaware; Adrienne Krol, Louis Stokes Cleveland VA Medical Center, Cleveland; Tanya Kulow, Louis Stokes Cleveland VA Medical Center, Cleveland; Mary Kuttler, Sentral Clinical Research Services, Cincinnati; Andy Lee, Delaware Research Group, LLC, Delaware; Jane Leksan, University Suburban Health Center, Cleveland; Susan McElroy-Marcus, Sentral Clinical Research Services, Cincinnati; Donald McNeil, Optimed Research, LTD, Columbus; Joseph Moran, Louis Stokes Cleveland VA Medical Center, Cleveland; Guy Mulligan, Cleveland Clinic, Ohio; Kevin Pantalone, Cleveland Clinic, Ohio; Christine Patel, Louis Stokes Cleveland VA Medical Center, Cleveland; Frank Perrino, Sentral Clinical Research Services, Cincinnati; Lori Peysha, University Suburban Health Center, Cleveland; Alicia Pickett, Louis Stokes Cleveland VA Medical Center, Cleveland; James Pritchard, Sentral Clinical Research Services, Cincinnati; Kathleen Provanzana, Delaware Research Group, LLC, Delaware; Philip Rancitelli, Optimed Research, LTD, Columbus; Randa Raupp, Sentral Clinical Research Services, Cincinnati; Adrian Schnall, University Suburban Health Center, Cleveland; Jaweriah Siddiqui, Sentral Clinical Research Services, Cincinnati; Cynthia Smith,

Optimed Research, LTD, Columbus; Ajay Sood, Louis Stokes Cleveland VA Medical Center, Cleveland; Jennifer Sortor, Advanced Medical Research, Maumee; Kristin Spinelli, Daniel G Williams MD, Perrysburg; Diana Taylor, Delaware Research Group, LLC, Delaware; Aaron Thornton, Optimed Research, LTD, Columbus; Margaret Tiktin, Louis Stokes Cleveland VA Medical Center, Cleveland; Melissa Twine, Prestige Clinical Research, Franklin; Ann Urbank, Optimed Research, LTD, Columbus; Francis Voegelé, Delaware Research Group, LLC, Delaware; Lawrence Wang, Sentral Clinical Research Services, Cincinnati; Daniel Weiss, Your Diabetes Endocrine Nutrition Group, Inc., Mentor; Amanda Werner, Louis Stokes Cleveland VA Medical Center, Cleveland; Daniel Williams, Daniel G Williams MD, Perrysburg; Charles Wilson, Optimed Research, LTD, Columbus.

*Oklahoma:* Teresa Aberle, LION Research, Norman; Sirllys Arcon-Rios, The University of Oklahoma Health Sciences Center Harold Hamm Diabetes Center, Oklahoma City; Bassam Arodak, The University of Oklahoma Health Sciences Center Harold Hamm Diabetes Center, Oklahoma City; Ammara Aziz, The University of Oklahoma Health Sciences Center Harold Hamm Diabetes Center, Oklahoma City; Lacey Bixler, The University of Oklahoma Health Sciences Center Harold Hamm Diabetes Center, Oklahoma City; Carolann Brisko, The University of Oklahoma Health Sciences Center Harold Hamm Diabetes Center, Oklahoma City; Melanie Cannon, The University of Oklahoma Health Sciences Center Harold Hamm Diabetes Center, Oklahoma City; James Choe, The University of Oklahoma Health Sciences Center Harold Hamm Diabetes Center, Oklahoma City; Lisa Connery, LION Research, Norman; Myriam Elkosseifi, The University of Oklahoma Health Sciences Center Harold Hamm Diabetes Center, Oklahoma City; Aja George, LION Research, Norman; Kimberly Hummer, The University of Oklahoma Health Sciences Center Harold Hamm Diabetes Center, Oklahoma City; Lauren LaBryer, The University of Oklahoma Health Sciences Center Harold Hamm Diabetes Center, Oklahoma City; James Lane, The University of Oklahoma Health Sciences Center Harold Hamm Diabetes Center, Oklahoma City; Jonea Lim, The University of Oklahoma Health Sciences Center Harold Hamm Diabetes Center, Oklahoma City; Lubna Mirza, LION Research, Norman; Saritha Mittadodla, The University of Oklahoma Health Sciences Center Harold Hamm Diabetes Center, Oklahoma City; Diane Priest, The University of Oklahoma Health Sciences Center Harold Hamm Diabetes Center, Oklahoma City; Veitla Rao, The University of Oklahoma Health Sciences Center Harold Hamm Diabetes Center, Oklahoma City; Cassie Ricci, The University of Oklahoma Health Sciences Center Harold Hamm Diabetes Center, Oklahoma City; Jennifer Salazar, The University of Oklahoma Health Sciences Center Harold Hamm Diabetes Center, Oklahoma City; Jessica Shaw, The University of Oklahoma Health Sciences Center Harold Hamm Diabetes Center, Oklahoma City; Jennifer St. John, The University of Oklahoma Health Sciences Center Harold Hamm Diabetes Center, Oklahoma City; Mitali Talsania, The University of Oklahoma Health Sciences Center Harold Hamm Diabetes Center, Oklahoma City.

*Oregon:* Farahnaz Joarder, Oregon Health & Science University Section of Diabetes, Portland; Matthew Riddle, Oregon Health & Science University Section of Diabetes, Portland; Kevin Yuen, Oregon Health & Science University Section of Diabetes, Portland.

*Pennsylvania:* Intekhab Ahmed, Thomas Jefferson University Diabetes Research Center, Philadelphia; Barry Austin, Preferred Primary Care Physicians Inc, Pittsburgh; Linda Bagnata, Geisinger Medical Center, Danville; Anthony Bartkowiak, Blair Medical Associates, Inc., Altoona; Jennifer Batrus, Clinical Research Associates of Central PA, Altoona; Thomas Baumgarten, Clinical Research Associates of Central PA, Altoona; Paula Belejchak, Preferred Primary Care Physicians Inc, Pittsburgh; Christine Belucher, Blair Medical Associates, Inc., Altoona; Julia Benton, Blair Medical Associates, Inc., Altoona; Peter Berger, Geisinger Medical Center, Danville; Mihaela Biscoveanu, Endocrine Metabolic Associates, Philadelphia; Abbie Blasick, Geisinger Medical Center, Danville; Kay Blyler, Geisinger Medical Center, Danville; Linda Casey, Geisinger Wyoming Valley/Geisinger Specialty Clinic, Willkes Barre; Bronell Chandler, The

Chandler & Thakur Medical Group, Upper Darby; Kim Chapman, Montgomery Medical Inc., Smithfield; Brian Chou, Thomas Jefferson University Diabetes Research Center, Philadelphia; Jennifer Cisar, Allegheny Endocrinology Associates, Pittsburg; Tabettha Clatterbuck, Preferred Primary Care Physicians, Inc., Uniontown; Richard Cook, Preferred Primary Care Physicians, Inc., Uniontown; Richard Cook II, Preferred Primary Care Physicians, Inc., Uniontown; Inderpreet Dardi, Thomas Jefferson University Diabetes Research Center, Philadelphia; Dina DeSalle, Heritage Valley Medical Group Inc., Beaver; Shari Edevane, Clinical Research Associates of Central PA, Altoona; Kelsey Elliott, Clinical Research Associates of Central PA, Altoona; Brian Everhart, Heritage Valley Medical Group Inc., Beaver; Kevin J. Furlong, Thomas Jefferson University Diabetes Research Center, Philadelphia; Jennifer Geishausser, Blair Medical Associates, Inc., Altoona; Marcy Goisse, Montgomery Medical Inc., Smithfield; Yvonne Goodman, Founders Research Corporation, Philadelphia; Murray Gordon, Allegheny Endocrinology Associates, Pittsburg; Catherine Gutowski, Sharon Regional Physician Services, Hermitage; Ronald Harris, Geisinger Wyoming Valley/Geisinger Specialty Clinic, Willkes Barre; Ronald Harris, Geisinger Medical Center, Danville; Ying Hu, Geisinger Medical Center, Danville; Jenny Hull, Preferred Primary Care Physicians Inc, Pittsburgh; Kathleen Iachini, Blair Medical Associates, Inc., Altoona; Kathleen Iachini, Clinical Research Associates of Central PA, Altoona; Anthony Iannamorelli, Preferred Primary Care Physicians, Inc., Uniontown; Serge Jabbour, Thomas Jefferson University Diabetes Research Center, Philadelphia; Timothy Jackson, Heritage Valley Medical Group Inc., Beaver; Brian Jameson, Geisinger Wyoming Valley/Geisinger Specialty Clinic, Willkes Barre; Paula Janosov, Geisinger Wyoming Valley/Geisinger Specialty Clinic, Willkes Barre; Terry Jordan, Blair Medical Associates, Inc., Altoona; John Kennedy, Geisinger Medical Center, Danville; John Kennedy, Geisinger Wyoming Valley/Geisinger Specialty Clinic, Willkes Barre; Gayle Kurtzer, Geisinger Wyoming Valley/Geisinger Specialty Clinic, Willkes Barre; Joseph Labuda, Preferred Primary Care Physicians, Inc., Uniontown; Anne LaRoche, Sharon Regional Physician Services, Hermitage; Lawrence Levinson, Clinical Research Associates of Central PA, Altoona; Robert Madder, Heritage Valley Medical Group Inc., Beaver; Kari Marconnet, Geisinger Medical Center, Danville; Patricia Mareda, Allegheny Endocrinology Associates, Pittsburg; Donna Michael, Heritage Valley Medical Group Inc., Beaver; Debra Michaels, Sharon Regional Physician Services, Hermitage; Cathy Miller, Geisinger Medical Center, Danville; Jeffrey Miller, Thomas Jefferson University Diabetes Research Center, Philadelphia; Ann Minnock, Allegheny Endocrinology Associates, Pittsburg; Michele Mitchell, Geisinger Medical Center, Danville; Hemlata Moturi, Allegheny Endocrinology Associates, Pittsburg; Heather Moyer, Blair Medical Associates, Inc., Altoona; Heather Moyer, Clinical Research Associates of Central PA, Altoona; Steven Nagelberg, Endocrine Metabolic Associates, Philadelphia; Michael Oliver, Heritage Valley Medical Group Inc., Beaver; Constance Pepe, Thomas Jefferson University Diabetes Research Center, Philadelphia; Patricia Porter, Geisinger Medical Center, Danville; Dora Posey, Thomas Jefferson University Diabetes Research Center, Philadelphia; Raman Purighalla, Preferred Primary Care Physicians Inc, Pittsburgh; Jessica Redmond, Montgomery Medical Inc., Smithfield; Joseph Reiling, Founders Research Corporation, Philadelphia; Susan Reiling, Founders Research Corporation, Philadelphia; Kathy Rine, Geisinger Medical Center, Danville; William Rust, Heritage Valley Medical Group Inc., Beaver; Jill Sandutch, Geisinger Wyoming Valley/Geisinger Specialty Clinic, Willkes Barre; Anette Shaffer, Sharon Regional Physician Services, Hermitage; Annette Shalongo, Geisinger Medical Center, Danville; Sarah Shawley, Clinical Research Associates of Central PA, Altoona; Pamela Shonk, Geisinger Wyoming Valley/Geisinger Specialty Clinic, Willkes Barre; Vinay Singh, Thomas Jefferson University Diabetes Research Center, Philadelphia; Andrea Slucki, Geisinger Wyoming Valley/Geisinger Specialty Clinic, Willkes Barre; Kellie Spiller, Allegheny Endocrinology Associates, Pittsburg; Nina Springer, Preferred Primary Care Physicians, Inc., Uniontown; Heidi Sprouse, Blair Medical Associates, Inc., Altoona; Albert Sun, Geisinger Wyoming Valley/Geisinger Specialty Clinic, Willkes Barre; Judith Taylor, Montgomery Medical Inc., Smithfield; Robert Watine, Sharon Regional Physician Services, Hermitage; Jean Watkinson, Preferred Primary Care Physicians Inc, Pittsburgh; Nancy Weaver, Blair Medical Associates, Inc., Altoona; Howard Wenocur, Founders Research Corporation, Philadelphia; Gary Yeoman, Founders Research Corporation, Philadelphia.



*South Carolina:* Jeremy Ackermann, Berkeley Family Practice, Moncks Corner; Nathan Averill, Berkeley Family Practice, Moncks Corner; Thomas Ballard, Mountain View Clinical Research Inc., Greer; William Byars, Mountain View Clinical Research Inc., Greer; Caroline Carter, Radiant Research Inc. /Primary Care Associates, Anderson; Cathleen Castay, Mountain View Clinical Research Inc., Greer; Shonda Cheek, Internal Medicine Associates, PA, Anderson; Jessica Collins, Berkeley Family Practice, Moncks Corner; Traci Collins-Jamison, Singleton Health Center, LLC, Orangeburg; Erin Cooksey, Radiant Research Inc. /Primary Care Associates, Anderson; Nicole Crockford, Spartanburg Medical Research, Spartanburg; Christopher Cutshall, Carolina Medical Affiliates, Spartanburg; Moahad Dar, East Carolina University - Brody Outpatient Center Module G BSOM, Greenville; Almond Drake, East Carolina University - Brody Outpatient Center Module G BSOM, Greenville; Kameron Dugat, Carolina Medical Affiliates, Spartanburg; John Durham, Carolina Medical Affiliates, Spartanburg; Nancy Durham, Carolina Medical Affiliates, Spartanburg; Nancy Durham, Mountain View Clinical Research Inc., Greer; Donald Eagerton, Carolina Health Specialists, Myrtle Beach; Nataish Edmonds, Mountain View Clinical Research Inc., Greer; Joseph Farmer III, Internal Medicine Associates, PA, Anderson; Charles Fogarty, Spartanburg Medical Research, Spartanburg; June Gatlin, Radiant Research Inc. /Primary Care Associates, Anderson; Harry Geisberg, Radiant Research Inc. /Primary Care Associates, Anderson; Margaret Grossman, Singleton Health Center, LLC, Orangeburg; Wendy Harrell, Mountain View Clinical Research Inc., Greer; John Harrison, Carolina Health Specialists, Myrtle Beach; Kristina Harrison, Radiant Research Inc. /Primary Care Associates, Anderson; Sarah Heincelman, Berkeley Family Practice, Moncks Corner; Lauren Holladay, Singleton Health Center, LLC, Orangeburg; Chad Huberty, Carolina Health Specialists, Myrtle Beach; Ingrid Isakov, Radiant Research Inc. /Primary Care Associates, Anderson; Norma Jordan, Singleton Health Center, LLC, Orangeburg; Michael Kunkel, Internal Medicine Associates, PA, Anderson; Susan Laserna, Radiant Research Inc. /Primary Care Associates, Anderson; Amanda Lawrence, Internal Medicine Associates, PA, Anderson; Andrew Lawrence, Internal Medicine Associates, PA, Anderson; Yolanda Livingston, Mountain View Clinical Research Inc., Greer; Eric Lloyd, Berkeley Family Practice, Moncks Corner; Sarah Long, Internal Medicine Associates, PA, Anderson; Lina Lopez, Mountain View Clinical Research Inc., Greer; Joyce Manuel, Internal Medicine Associates, PA, Anderson; Ronald Mayfield, Carolina Medical Affiliates, Spartanburg; Ronald Mayfield, Mountain View Clinical Research Inc., Greer; Margaret McDonald, Singleton Health Center, LLC, Orangeburg; Caroleann Morgan, The Diabetes Center, LLC, Murrells Inlet; Joanie Munn, The Diabetes Center, LLC, Murrells Inlet; Lauren Murphy, Singleton Health Center, LLC, Orangeburg; Brent Nicol, The Diabetes Center, LLC, Murrells Inlet; Philip Nicol, The Diabetes Center, LLC, Murrells Inlet; Rebecca Norris, Radiant Research Inc. /Primary Care Associates, Anderson; Bunny Phillips, Mountain View Clinical Research Inc., Greer; Angela Reeves, Radiant Research Inc. /Primary Care Associates, Anderson; Jacqueline Roach, Singleton Health Center, LLC, Orangeburg; Irene Ross, Carolina Health Specialists, Myrtle Beach; Jeffrey Santi, Berkeley Family Practice, Moncks Corner; Jacqueline Saunders, Mountain View Clinical Research Inc., Greer; Henry Shugart, Carolina Medical Affiliates, Spartanburg; Monnieque Singleton, Singleton Health Center, LLC, Orangeburg; Erin Slee, Berkeley Family Practice, Moncks Corner; Kathleen Smalley, Carolina Medical Affiliates, Spartanburg; Kathleen Smalley, Mountain View Clinical Research Inc., Greer; Kristy Smith, Mountain View Clinical Research Inc., Greer; Carl Sofley, Internal Medicine Associates, PA, Anderson; Vesna Solheim, The Diabetes Center, LLC, Murrells Inlet; Samantha Spell, Radiant Research Inc. /Primary Care Associates, Anderson; Robert Tanenberg, East Carolina University - Brody Outpatient Center Module G BSOM, Greenville; Chester Whitley, Singleton Health Center, LLC, Orangeburg; Michele Widell, Radiant Research Inc. /Primary Care Associates, Anderson; Gordon Wilhoit, Berkeley Family Practice, Moncks Corner; Ruth Wood, Mountain View Clinical Research Inc., Greer; Jaime Wright, Radiant Research Inc. /Primary Care Associates, Anderson; Alissa Wulf, Berkeley Family Practice, Moncks Corner; Julie Zapkowski, Berkeley Family Practice, Moncks Corner.

*Tennessee:* Kristi Adams, PMG Research of Knoxville, Knoxville; Roberta Adams, Trinity Clinical Research LLC, Tullahoma; Parvati Ananthula, Holston Medical Group, Kingsport; Caitlin Bass, PMG Research of Knoxville, Knoxville; Chad Bates, Holston Medical Group, Kingsport; Howard Baum, Diabetes and Obesity

Clinical Trials Center, Nashville; Anna Bays, Holston Medical Group, Kingsport; Teresa Beck, The Green Clinic, Memphis; Brett Bilbrey, PMG Research of Knoxville, Knoxville; Ashley Brown, Holston Medical Group, Kingsport; Anna Carlton, InvestiClin Research, Nashville; Jenny Carter, PMG Research of Knoxville, Knoxville; Laura Cheri, Meharry Medical College PCIR, Nashville; Richard Childress, Baptist Memorial Medical Group, Inc., Memphis; Mark Cloud, PMG Research of Knoxville, Knoxville; A. Jay Cohen, Baptist Memorial Medical Group, Inc., Memphis; Alice Coulter, University Diabetes & Endocrine Consultants, Chattanooga; Kimberly Dotson, Michael L Reeves, MD, Chattanooga; Christopher Green, The Green Clinic, Memphis; Ashley Helton, Holston Medical Group, Kingsport; Jody Houstrup, Chattanooga Research And Medicine, PLLC (Charm), Chattanooga; David Huffman, University Diabetes & Endocrine Consultants, Chattanooga; Fred Hurst, PMG Research of Knoxville, Knoxville; James Hurst, PMG Research of Knoxville, Knoxville; Curtis Jantzi, Holston Medical Group, Kingsport; Randy Jerkins, MidState Endocrine Associates, Nashville; Terri Jerkins, MidState Endocrine Associates, Nashville; Mandy Jones, University Diabetes & Endocrine Consultants, Chattanooga; Shane Kelley, PMG Research of Knoxville, Knoxville; Judy Kroulek, Chattanooga Research And Medicine, PLLC (Charm), Chattanooga; Dennis Lawhun, InvestiClin Research, Nashville; Marcus Lee, Trinity Clinical Research LLC, Tullahoma; James Louthan, Holston Medical Group, Kingsport; Rickey Manning, PMG Research of Knoxville, Knoxville; Michael May, Diabetes and Obesity Clinical Trials Center, Nashville; Katherine Means, Trinity Clinical Research LLC, Tullahoma; Jeanabe Monroe, Trinity Clinical Research LLC, Tullahoma; Emily Morawski, Holston Medical Group, Kingsport; David Morin, Holston Medical Group, Kingsport; Barbara Morris, Baptist Memorial Medical Group, Inc., Memphis; John Murray, Meharry Medical College PCIR, Nashville; Robert Nichols, Trinity Clinical Research LLC, Tullahoma; Stacie Olivi, Baptist Memorial Medical Group, Inc., Memphis; Kristina Pennington, InvestiClin Research, Nashville; Jenny Poe, InvestiClin Research, Nashville; Omid Rad Pour, Baptist Memorial Medical Group, Inc., Memphis; Michael Reeves, Michael L Reeves, MD, Chattanooga; Pamela Reeves, Michael L Reeves, MD, Chattanooga; Connie Root, Diabetes and Obesity Clinical Trials Center, Nashville; Karen Rose, PMG Research of Knoxville, Knoxville; Lily Rutledge, Baptist Memorial Medical Group, Inc., Memphis; Eugene Ryan, Chattanooga Research And Medicine, PLLC (Charm), Chattanooga; Patricia Schwartz, Trinity Clinical Research LLC, Tullahoma; Jennifer Shafer, Holston Medical Group, Kingsport; Chitra Singh, Meharry Medical College PCIR, Nashville; Ashley Smith, Holston Medical Group, Kingsport; Rodney Snow, InvestiClin Research, Nashville; Henry Stamps, The Green Clinic, Memphis; Peggy Staton, Holston Medical Group, Kingsport; Jeffrey Stevens, PMG Research of Knoxville, Knoxville; Cathy Stovall, Trinity Clinical Research LLC, Tullahoma; Rodney Sturgeon, PMG Research of Knoxville, Knoxville; John Tapp, Chattanooga Research And Medicine, PLLC (Charm), Chattanooga; Stacy Tapp, Chattanooga Research And Medicine, PLLC (Charm), Chattanooga; Carla Warner, PMG Research of Knoxville, Knoxville; Melissa Weiss, Trinity Clinical Research LLC, Tullahoma; Judith White, Holston Medical Group, Kingsport; Craig Wierum, InvestiClin Research, Nashville; Konya Williams, Meharry Medical College PCIR, Nashville; Tiffanie Wright, InvestiClin Research, Nashville.

*Texas:* Marconi Abreu, UT Southwestern Medical Center, Dallas; Vandana Agarwal, ClinRX Research, LLC, Carrollton; Aftab Ahmad, Research Trials Worldwide LLC, Humble; Asma Ahmad, Research Trials Worldwide LLC, Humble; Faiz Ahmed, Pioneer Research Solutions, Inc., Sugar Land; Lily Ahn, Texas Diabetes & Endocrinology, P.A., Austin; Rachid Alaoui, Carl R. Meisner Medical Clinic, PLLC, Sugar Land; Rachid Alaoui, Gulf Coast Medical Research LLC, Houston; Stephanie Alarcon, Carl R. Meisner Medical Clinic, PLLC, Sugar Land; Dale Allison, Hillcrest Family Health Center, Waco; Rajasekaran Annamalai, East Montgomery County Clinic, Splendora; Rajasekaran Annamalai, Lakewood Family Practice, Houston; Khadija Arain, Sun Research Institute, San Antonio; Angelica Arellano, Arlington Family Research Center, Inc., Arlington; Barbara Arispe, Central Texas Clinical Research, Austin; Stephen Aronoff, Research Institute of Dallas, Dallas; Jesus Arroyo, Pioneer Research Solutions, Inc., Sugar Land; Trista Bachand, Diabetes and Thyroid Center of Fort Worth, Fort Worth; Becky Bailey, Gonzalez Family & Occupational Medicine, Houston; Chris Bajaj, Diabetes and Thyroid Center of Fort Worth, Fort Worth; Salomon

Banarer, Dallas Diabetes & Endocrine Center, Dallas; Christine Barnella, DCT-Stone Oak, LLC dba Discovery Clinical Trials, San Antonio; Mary Bartz, Central Texas Clinical Research, Austin; Jason Bates, Sun Research Institute, San Antonio; Karen Becerra, Carl R. Meisner Medical Clinic, PLLC, Sugar Land; Melissa Benavides, Texas Health Physicians Group, Carrollton; Subodh Bhuchar, Pioneer Research Solutions, Inc., Sugar Land; Thomas Blevins, Texas Diabetes & Endocrinology, P.A., Austin; Amanda Bonazzi, Texas Diabetes & Endocrinology, Round Rock; Cynthia Brinson, Central Texas Clinical Research, Austin; Timiki Brown, East Montgomery County Clinic, Splendora; Timiki Brown, PCP For Life, Houston; Brandee Buckley, UT Southwestern Medical Center, Dallas; Christy Bunker, Clark Medical Center, Houston; Jose Burbano, Texas Health Physicians Group, Carrollton; Vickey Busch, Breco Research, Ltd, Sugar Land; Rosibel Bustamante, Gulf Coast Medical Research LLC, Houston; Natalee Calais, Lakewood Family Practice, Houston; Allison Camacho, Dallas Diabetes & Endocrine Center, Dallas; Shana Camp, Protenium Clinical Research, Hurst; Nancy Canada, Hillcrest Family Health Center, Waco; Daniel Canchola, Texas Health Physicians Group, Irving; Monica Cano, Texas Diabetes & Endocrinology, P.A., Austin; Veronica Cardenas, Physician PrimeCare Research Institute, PLLC dba Health Texas Research Institute, San Antonio; Leighton Carl, Hillcrest Family Health Center, Waco; Luis Casaubon, Texas Diabetes & Endocrinology, P.A., Austin; Jessica Castaneda, PrimeCare Medical Group, Houston; Cindy Castro, Protenium Clinical Research, Hurst; Diego Ceniceros, Sun Research Institute, San Antonio; Tira Chaicha-Brom, Texas Diabetes & Endocrinology, P.A., Austin; Tira Chaicha-Brom, Texas Diabetes & Endocrinology, Austin; Sudipta Chaudhuri, PCP For Life, Houston; Alberto Chavez-Velazquez, Audie L. Murphy VA Hospital, San Antonio; Jocelyn Chen, Gonzalez Family & Occupational Medicine, Houston; Theresa Cheyne, Diabetes and Thyroid Center of Fort Worth, Fort Worth; Sapna Chilka, Midland Clinical Research Center, Midland; Kristen Chionh, Priscilla Hollander, MD, Dallas; Imran Chunawala, Pioneer Research Solutions, Inc., Sugar Land; Alison Cooper, Texas Diabetes & Endocrinology, P.A., Austin; Alison Cooper, Texas Diabetes & Endocrinology, Round Rock; Alison Cooper, Texas Diabetes & Endocrinology, Austin; Pamela Cope, Research Institute of Dallas, Dallas; Sonja Cotton, PCP For Life, Houston; Munib Daudjee, Clark Medical Center, Houston; Munib Daudjee, East Montgomery County Clinic, Splendora; Munib Daudjee, Lakewood Family Practice, Houston; Tichina Davidson, ClinRX Research, LLC, Carrollton; Geraldine De Loa, Gonzalez Family & Occupational Medicine, Houston; Ann Deniega, East Montgomery County Clinic, Splendora; Naco Dillow, Jalil Aziz Khan MD, PA, Lewisville; Michael Dominguez, Physician PrimeCare Research Institute, PLLC dba Health Texas Research Institute, San Antonio; Steven Dorfman, Research Institute of Dallas, Dallas; Ankur Doshi, PrimeCare Medical Group, Houston; Theresa Dunnam, DCT-Stone Oak, LLC dba Discovery Clinical Trials, San Antonio; Papiya Dutta, Texas Diabetes & Endocrinology, P.A., Austin; Megann Eiler-Prater, Arlington Family Research Center, Inc., Arlington; Christina Eizensmits, Protenium Clinical Research, Hurst; Valerie Espinosa, Texas Diabetes & Endocrinology, P.A., Austin; Charles Evans, Texas Diabetes & Endocrinology, Austin; Cathy Frisinger, Diabetes and Thyroid Center of Fort Worth, Fort Worth; Shylesh Ganta, Midland Clinical Research Center, Midland; Kirsten Galtney, Breco Research, Ltd, Sugar Land; John Gammon, PrimeCare Medical Group, Houston; Analisa Marie Garcia, Physician PrimeCare Research Institute, PLLC dba Health Texas Research Institute, San Antonio; Ronald Garcia, Covenant Clinical Research, P.A., San Antonio; Tina Glaspie, Breco Research, Ltd, Sugar Land; Laura Golici, UT Southwestern Medical Center, Dallas; Julian Gonzalez, Gonzalez Family & Occupational Medicine, Houston; David Grant, Sun Research Institute, San Antonio; Carrie Green, DCOL Center for Clinical Research, Longview; Lindsay Groce, Texas Diabetes & Endocrinology, Round Rock; Stephanie Guevara, Clark Medical Center, Houston; Stephanie Guevara, East Montgomery County Clinic, Splendora; Stephanie Guevara, Lakewood Family Practice, Houston; Stephanie Guevara, PCP For Life, Houston; Mary Gutierrez, Arlington Family Research Center, Inc., Arlington; Cortney Hance, Texas Diabetes & Endocrinology, P.A., Austin; Tiffany Harden, DCT-Stone Oak, LLC dba Discovery Clinical Trials, San Antonio; Lindsay Harrison, Texas Diabetes & Endocrinology, P.A., Austin; Lindsay Harrison, Texas Diabetes & Endocrinology, Austin; Carlos Herrera, Heights Doctors Clinic, Houston; Evelyn Hettler, Physician PrimeCare Research Institute, PLLC dba Health Texas Research Institute, San Antonio; Michelle Holcomb, Texas Health Physicians Group,

Richardson; Priscilla Hollander, Priscilla Hollander, MD, Dallas; Laura Hoste, Dallas Diabetes & Endocrine Center, Dallas; Tina Hudson, DCOL Center for Clinical Research, Longview; Leticia Huerta, Gulf Coast Medical Research LLC, Houston; Mahendra Jain, The Methodist Hospital d/b/a HMRI CCAT Pearland, Pearland; Preeth Jayaram, Clark Medical Center, Houston; Preeth Jayaram, Lakewood Family Practice, Houston; Monique Johnson, Sun Research Institute, San Antonio; Olivia Johnson, Texas Diabetes & Endocrinology, Round Rock; Laurie Jones, Priscilla Hollander, MD, Dallas; John Joseph, ClinRX Research, LLC, Carrollton; Misty Juarez, Sun Research Institute, San Antonio; Najmuddin Karimjee, Clark Medical Center, Houston; Najmuddin Karimjee, East Montgomery County Clinic, Splendora; Najmuddin Karimjee, Lakewood Family Practice, Houston; Najmuddin Karimjee, PCP For Life, Houston; Michelle Kelly, Sun Research Institute, San Antonio; Ashley Kephart, Breco Research, Ltd, Sugar Land; Armgan Khan, Carl R. Meisner Medical Clinic, PLLC, Sugar Land; Jalil Khan, Jalil Aziz Khan MD, PA, Lewisville; Michael Killian, Central Texas Clinical Research, Austin; Wendy Kniffen, Dallas Diabetes & Endocrine Center, Dallas; Maureen Koops, Audie L. Murphy VA Hospital, San Antonio; Louise Kwan, Texas Health Physicians Group, Richardson; John La, Acacia Medical Research Institute, LLC, Sugar Land; Jessica Laabs, East Montgomery County Clinic, Splendora; Gilbert Ledesma, Arlington Family Research Center, Inc., Arlington; Monica Lee, T&R CLINIC, PA, Fort Worth; Kathryn Leuck, Research Institute of Dallas, Dallas; Ildiko Lingvay, UT Southwestern Medical Center, Dallas; Carrie Livingston, Texas Diabetes & Endocrinology, P.A., Austin; Teresa Llanas, Sun Research Institute, San Antonio; Andy Longoria, Jalil Aziz Khan MD, PA, Lewisville; Jesse Lorta, Lakewood Family Practice, Houston; Larry Lothringer, Sun Research Institute, San Antonio; Maria MacAdams, Michael R. MacAdams, MD, Lubbock; Michael MacAdams, Michael R. MacAdams, MD, Lubbock; Brian MacGillivray, DCT-Stone Oak, LLC dba Discovery Clinical Trials, San Antonio; Melissa Mageno, Sun Research Institute, San Antonio; Megan Malek, Texas Diabetes & Endocrinology, P.A., Austin; Meghan Manley, Priscilla Hollander, MD, Dallas; Karen Marler, Lakewood Family Practice, Houston; Cristina Martinez, Sun Research Institute, San Antonio; Jodi Massie, Jalil Aziz Khan MD, PA, Lewisville; Glenda Mateos, Gonzalez Family & Occupational Medicine, Houston; Reena Mathew, Jalil Aziz Khan MD, PA, Lewisville; Claudia Maya, Lakewood Family Practice, Houston; Meg Mazour, Central Texas Clinical Research, Austin; Caroline Mbogua, Carl R. Meisner Medical Clinic, PLLC, Sugar Land; Caroline Mbogua, Gulf Coast Medical Research LLC, Houston; Robert McClendon, Breco Research, Ltd, Sugar Land; Deirdre McMullen, Gulf Coast Medical Research LLC, Houston; Carl Meisner, Carl R. Meisner Medical Clinic, PLLC, Sugar Land; Carl Meisner, Gulf Coast Medical Research LLC, Houston; Ethelina Menchaca, Heights Doctors Clinic, Houston; Linda Meyers, Texas Diabetes & Endocrinology, P.A., Austin; Audrey Miklius, Research Institute of Dallas, Dallas; Alissa Milam, Central Texas Clinical Research, Austin; Ronnie Milam, Central Texas Clinical Research, Austin; Tracey Miller, Breco Research, Ltd, Sugar Land; Lisa Mize, Dallas Diabetes & Endocrine Center, Dallas; Roger Moczygemba, Sun Research Institute, San Antonio; Alexandria Nafegar, East Montgomery County Clinic, Splendora; Jayaram Naidu, Naidu Clinic, Odessa; Archana Nair, Physician PrimeCare Research Institute, PLLC dba Health Texas Research Institute, San Antonio; Archana Nair, Sun Research Institute, San Antonio; Alison Nguyen, East Montgomery County Clinic, Splendora; Douglas Nielsen, Clark Medical Center, Houston; Josier Nisnisan, Acacia Medical Research Institute, LLC, Sugar Land; Maria Nisnisan, Acacia Medical Research Institute, LLC, Sugar Land; Wendy Oden, DCOL Center for Clinical Research, Longview; Jessica Orsak, Clark Medical Center, Houston; Jessica Orsak, East Montgomery County Clinic, Splendora; Jessica Orsak, Lakewood Family Practice, Houston; Kerem Ozer, Texas Diabetes & Endocrinology, Round Rock; Olivia Papacostea, UT Southwestern Medical Center, Dallas; Ravi Panchal, ClinRX Research, LLC, Carrollton; Manish Parikh, PrimeCare Medical Group, Houston; Beneta Parthiban, Sun Research Institute, San Antonio; Brittney Perrin, Covenant Clinical Research, P.A., San Antonio; Harvonya Perkins, Physician PrimeCare Research Institute, PLLC dba Health Texas Research Institute, San Antonio; Madhuri Poduri, UT Southwestern Medical Center, Dallas; Laurentiu Pop, UT Southwestern Medical Center, Dallas; Nancy Portales, Sun Research Institute, San Antonio; Linda Porter-Tucci, The Methodist Hospital d/b/a HMRI CCAT Pearland, Pearland; Sharon Postell, Covenant Clinical Research, P.A., San Antonio; Ronald Pucillo, Breco Research, Ltd, Sugar Land; Madhavi Reddy, Clark Medical

Center, Houston; Rajneesh Reddy, T&R CLINIC, PA, Fort Worth; Ramon Gilberto Reyes Almodovar, Covenant Clinical Research, P.A., San Antonio; Timiki Richard, East Montgomery County Clinic, Splendora; Michele Richardson, Hillcrest Family Health Center, Waco; Louie Riesch, Texas Diabetes & Endocrinology, P.A., Austin; Samuel Rivera-Flores, Heights Doctors Clinic, Houston; Abid Rizvi, Clark Medical Center, Houston; Abid Rizvi, East Montgomery County Clinic, Splendora; Abid Rizvi, Gonzalez Family & Occupational Medicine, Houston; Abid Rizvi, Lakewood Family Practice, Houston; Abid Rizvi, PCP For Life, Houston; Samana Rizvi, Clark Medical Center, Houston; Samana Rizvi, East Montgomery County Clinic, Splendora; Samana Rizvi, Lakewood Family Practice, Houston; Samana Rizvi, PCP For Life, Houston; Kristen Rodas, PCP For Life, Houston; Mark Rodgers, Arlington Family Research Center, Inc., Arlington; Erin Roe, Priscilla Hollander, MD, Dallas; Rebecca Rogers, Central Texas Clinical Research, Austin; Reina Romero, Gulf Coast Medical Research LLC, Houston; Leslie Rooker-Morris, Dallas Diabetes & Endocrine Center, Dallas; Julio Rosenstock, Dallas Diabetes & Endocrine Center, Dallas; Richard Sachson, Research Institute of Dallas, Dallas; Alfredo Salcedo, Acacia Medical Research Institute, LLC, Sugar Land; Joseph Schill, Research Institute of Dallas, Dallas; Kristy Schuh, Priscilla Hollander, MD, Dallas; Randall Schuster, DCT-Stone Oak, LLC dba Discovery Clinical Trials, San Antonio; Anita Scribner, DCOL Center for Clinical Research, Longview; Arunkumar Shah, PCP For Life, Houston; Stephanie Shaw, Texas Diabetes & Endocrinology, Round Rock; Jefferey Shirley, Texas Diabetes & Endocrinology, Round Rock; Mindy Shook, DCOL Center for Clinical Research, Longview; Muhammad Siddiqui, UT Southwestern Medical Center, Dallas; Jamie Sims, Breco Research, Ltd, Sugar Land; Kamalpreet Singh, Texas Diabetes & Endocrinology, Round Rock; Jennifer Skero, Michael R. MacAdams, MD, Lubbock; Debra Smejdir, Dallas Diabetes & Endocrine Center, Dallas; Amy Stacey, DCOL Center for Clinical Research, Longview; Robert Strzinek, Protenium Clinical Research, Hurst; Anjanette Tan, Diabetes and Thyroid Center of Fort Worth, Fort Worth; Khadija Tayabali, Lakewood Family Practice, Houston; Almudena Tercero, Texas Diabetes & Endocrinology, P.A., Austin; Jessica Terry, Protenium Clinical Research, Hurst; Irene Tinney, Naidu Clinic, Odessa; Florence Toe, Carl R. Meisner Medical Clinic, PLLC, Sugar Land; Florence Toe, Gulf Coast Medical Research LLC, Houston; Sara Toler, Protenium Clinical Research, Hurst; Devjit Tripathy, Audie L. Murphy VA Hospital, San Antonio; Anna Tumyan, UT Southwestern Medical Center, Dallas; Michelle Ulrich, Texas Diabetes & Endocrinology, Round Rock; Krissandra Underwood, Central Texas Clinical Research, Austin; Christina Valdez, Heights Doctors Clinic, Houston; April Valdivieso, Covenant Clinical Research, P.A., San Antonio; Anna Vanderheiden, UT Southwestern Medical Center, Dallas; Morgan Vandre, DCOL Center for Clinical Research, Longview; Megan Vardeman, PrimeCare Medical Group, Houston; Richard Vargas, Physician PrimeCare Research Institute, PLLC dba Health Texas Research Institute, San Antonio; Monica Vilchis, Clark Medical Center, Houston; Monica Vilchis, East Montgomery County Clinic, Splendora; Monica Vilchis, Gonzalez Family & Occupational Medicine, Houston; Monica Vilchis, Lakewood Family Practice, Houston; Monica Vilchis, PCP For Life, Houston; Desiree Warne, Texas Diabetes & Endocrinology, Round Rock; Jeannine Wallace, PrimeCare Medical Group, Houston; Kathleen Weindorff, DCOL Center for Clinical Research, Longview; Heather Welch, Sun Research Institute, San Antonio; Brandy Wellmon, Texas Diabetes & Endocrinology, Austin; Gary Werntz, Central Texas Clinical Research, Austin; Leta White, Hillcrest Family Health Center, Waco; Tearani Williams, Texas Health Physicians Group, Irving; Maria Wilson, Physician PrimeCare Research Institute, PLLC dba Health Texas Research Institute, San Antonio; Robyn Wilson, Heights Doctors Clinic, Houston; Ronald Wilson, Hillcrest Family Health Center, Waco; John Wood, Texas Health Physicians Group, Richardson; David Wright, Central Texas Clinical Research, Austin; Rhonda Yeatts, Physician PrimeCare Research Institute, PLLC dba Health Texas Research Institute, San Antonio; Rezwana Zahir, Clark Medical Center, Houston; Rezwana Zahir, East Montgomery County Clinic, Splendora; Rezwana Zahir, Lakewood Family Practice, Houston; Rezwana Zahir, PCP For Life, Houston.

*Utah:* Becky Crockett, University of Utah School of Medicine, Salt Lake City; Ashlee Fawson, Optimum Clinical Research, Inc., Salt Lake City; Timothy Graham, University of Utah School of Medicine, Salt Lake City; Zachary Mitchell, University of Utah School of Medicine, Salt Lake City; Sally Quinn, Optimum

Clinical Research, Inc., Salt Lake City; Deepika Reddy, University of Utah School of Medicine, Salt Lake City; Jackson Rhudy, Optimum Clinical Research, Inc., Salt Lake City; Priscilla Rosen, University of Utah School of Medicine, Salt Lake City; Kaylynn Shakespear, University of Utah School of Medicine, Salt Lake City; Debra Simmons, University of Utah School of Medicine, Salt Lake City; Ashley Turner, Optimum Clinical Research, Inc., Salt Lake City; Erin Vanderhoof, University of Utah School of Medicine, Salt Lake City; Matthew Wahl, University of Utah School of Medicine, Salt Lake City; Imran Zubair, Optimum Clinical Research, Inc., Salt Lake City.

*Vermont:* Michael Albus, David M. Gorson, MD, Bennington; Matthew Gilbert, University of Vermont Medical Center, South Burlington; David Gorson, David M. Gorson, MD, Bennington; Annis Marney, University of Vermont Medical Center, South Burlington; Juan Pablo Perdomo Rodriguez, University of Vermont Medical Center, South Burlington; Marilyn Roth, University of Vermont Medical Center, South Burlington; Sheilah Scofield, David M. Gorson, MD, Bennington; Anna Thottan, University of Vermont Medical Center, South Burlington.

*Virginia:* Margaret Bittorf, Selma Medical Associates, Winchester; Emad Botros, Selma Medical Associates, Winchester; Jeanette Carpenter, Virginia Research Center, Midlothian; Carie Dashiell, York Clinical Research LLC, Norfolk; Nancy Dimascio-Johnson, McGuire VA Medical Center, Richmond; Sonja Fredrickson, McGuire VA Medical Center, Richmond; M. Gruenther, Selma Medical Associates, Winchester; Lisa Hall, McGuire VA Medical Center, Richmond; Aaron Hartman, Virginia Research Center, Midlothian; Janette Hiner, McGuire VA Medical Center, Richmond; Donna Kelley, Selma Medical Associates, Winchester; Melissa Kimmel, McGuire VA Medical Center, Richmond; Laura Larrick, McGuire VA Medical Center, Richmond; Marie Lawson, McGuire VA Medical Center, Richmond; James Levy, McGuire VA Medical Center, Richmond; Teneshia Lewis, York Clinical Research LLC, Norfolk; Charles Lovell, York Clinical Research LLC, Norfolk; James Newby, York Clinical Research LLC, Norfolk; Michelle Nichols, McGuire VA Medical Center, Richmond; Philip O'Donnell, Selma Medical Associates, Winchester; Sheyla Orengo, McGuire VA Medical Center, Richmond; Thomas Pecsok, York Clinical Research LLC, Norfolk; Lind Reiss, Virginia Research Center, Midlothian; Phillip Tarkington, McGuire VA Medical Center, Richmond; Donald Yeatts, Virginia Research Center, Midlothian; Franklin Zieve, McGuire VA Medical Center, Richmond.

*Washington:* Imtiaz Ahmed, Zain Research, LLC, Richland; Sajid Ali, Zain Research, LLC, Richland; Sami Anwar, Zain Research, LLC, Richland; Harold Cathcart, Northside Internal Medicine, Spokane; Lucia Dawson, Zain Research, LLC, Richland; Rolando Floresca, Zain Research, LLC, Richland; Ashley Galvan, Zain Research, LLC, Richland; Timothy Gardner, Northside Internal Medicine, Spokane; Kami Halsey, Northside Internal Medicine, Spokane; Farrukh Hashmi, Zain Research, LLC, Richland; Jackie Hegel, Zain Research, LLC, Richland; Megan Landon, Zain Research, LLC, Richland; Katlynn Moulton, Zain Research, LLC, Richland; Cheta Nand, Zain Research, LLC, Richland; Amra Sakic, Zain Research, LLC, Richland; Brandie Sevey, Northside Internal Medicine, Spokane; Bruce Wilson, Zain Research, LLC, Richland.

*Wisconsin:* Eva Agaiby, Clinical Investigation Specialists, Inc., Kenosha; John Agaiby, Clinical Investigation Specialists, Inc., Kenosha; Scott Ahl, Clement J. Zablocki VA Medical Center, Milwaukee; Robert Blank, Clement J. Zablocki VA Medical Center, Milwaukee; Gerard Coly, Clement J. Zablocki VA Medical Center, Milwaukee; Jennifer Hoenig, Clinical Investigation Specialists, Inc., Kenosha; Rajeev Jain, Aurora Advanced Healthcare Inc., Milwaukee; Elizabeth Joseph, Clinical Investigation Specialists, Inc., Kenosha; Debra Kasprzak, Aurora Advanced Healthcare Inc., Milwaukee; Lalaine Kisiel, Clinical Investigation Specialists, Inc., Kenosha; Maurene Maaske, Aurora Advanced Healthcare Inc., Milwaukee; Smriti Manadhar, Clement J. Zablocki VA Medical Center, Milwaukee; Shailendra Patel, Clement J. Zablocki VA Medical Center, Milwaukee; Whitney Sickler, Clinical Investigation Specialists, Inc., Kenosha.

## Inclusion and exclusion criteria

### Inclusion criteria

- Type 2 diabetes
- HbA<sub>1c</sub> ≥7.0 %
- **OR** HbA<sub>1c</sub> <7.0 % and current insulin treatment corresponding to ≥20 U/day of basal insulin
- Current treatment with one or more oral or injectable antidiabetic agents
- Age ≥50 years at screening and at least one of the following conditions:
  - Prior myocardial infarction
  - Prior stroke or prior TIA
  - Prior coronary, carotid or peripheral arterial revascularization
  - >50% stenosis on angiography or other imaging of coronary, carotid or lower-extremity artery
  - History of symptomatic coronary heart disease documented by positive exercise stress test or any cardiac imaging, or unstable angina pectoris with ECG changes
  - Asymptomatic cardiac ischemia documented by positive nuclear imaging test or exercise test or dobutamine stress echo
  - Chronic heart failure NYHA class II–III
  - Chronic kidney disease corresponding to estimated glomerular filtration rate 30–59 mL/min/1.73m<sup>2</sup> per CKD-EPI
- **OR** Age ≥60 years at screening and at least one of the following risk factors:
  - Microalbuminuria or proteinuria
  - Hypertension and left ventricular hypertrophy by ECG or imaging
  - Left ventricular systolic and diastolic dysfunction by imaging
  - Ankle/brachial index <0.9

### Exclusion criteria

- An acute coronary or cerebrovascular event in the previous 60 days
- Planned coronary, carotid or peripheral artery revascularization
- Chronic heart failure NYHA class IV
- Current hemodialysis or peritoneal dialysis or eGFR <30 mL/min/1.73 m<sup>2</sup> per CKD-EPI
- End-stage liver disease, defined as the presence of acute or chronic liver disease and recent history of one or more of the following: ascites, encephalopathy, variceal bleeding, bilirubin ≥2.0 mg/dL, albumin level ≤3.5 g/dL, prothrombin time ≥4 seconds prolonged, international normalized ratio ≥1.7 or prior liver transplant
- Known or suspected hypersensitivity to trial products or related products
- Female of child-bearing potential who is pregnant, breast-feeding or intends to become pregnant, or is not using adequate contraceptive methods as required by local law or practice
- Expected simultaneous participation in any other clinical trial of an investigational medicinal product. Participation in a clinical trial with stent(s) is allowed
- Receipt of any investigational medicinal product within 30 days before randomization. Brazil: Receipt of any investigational medicinal product within 1 year before randomization unless there is a direct benefit to the patient at the investigator's discretion
- Current or past (within the last 5 years) malignant neoplasms (except basal cell and squamous cell skin carcinoma)
- Any condition that, in the investigator's opinion, would make the patient unable to adhere to the initial trial visit schedule and procedures

## Clinical event definitions

|                                                                |                                                                                                                                                                                                                                                                                                                                                                                                                                                                                                                                                                                                                                                                                                                                                                                                                                                                                                                                                                                                                                                                                                                                                                                                                                                                                                                                                                                                                                                                                                                                                                                                                                                                                                                                                                                                                                                                                                                                                                                                                                                                                                                                                                                                                                                                                                                                                                                                                                                                                                                                                                                                                                                                                                             |
|----------------------------------------------------------------|-------------------------------------------------------------------------------------------------------------------------------------------------------------------------------------------------------------------------------------------------------------------------------------------------------------------------------------------------------------------------------------------------------------------------------------------------------------------------------------------------------------------------------------------------------------------------------------------------------------------------------------------------------------------------------------------------------------------------------------------------------------------------------------------------------------------------------------------------------------------------------------------------------------------------------------------------------------------------------------------------------------------------------------------------------------------------------------------------------------------------------------------------------------------------------------------------------------------------------------------------------------------------------------------------------------------------------------------------------------------------------------------------------------------------------------------------------------------------------------------------------------------------------------------------------------------------------------------------------------------------------------------------------------------------------------------------------------------------------------------------------------------------------------------------------------------------------------------------------------------------------------------------------------------------------------------------------------------------------------------------------------------------------------------------------------------------------------------------------------------------------------------------------------------------------------------------------------------------------------------------------------------------------------------------------------------------------------------------------------------------------------------------------------------------------------------------------------------------------------------------------------------------------------------------------------------------------------------------------------------------------------------------------------------------------------------------------------|
| Acute coronary syndrome                                        | Acute coronary syndrome conditions include ST-elevation acute myocardial infarction (STEMI), non-ST elevation acute myocardial infarction (NSTEMI), and unstable angina pectoris (UAP) requiring hospitalization.                                                                                                                                                                                                                                                                                                                                                                                                                                                                                                                                                                                                                                                                                                                                                                                                                                                                                                                                                                                                                                                                                                                                                                                                                                                                                                                                                                                                                                                                                                                                                                                                                                                                                                                                                                                                                                                                                                                                                                                                                                                                                                                                                                                                                                                                                                                                                                                                                                                                                           |
| Myocardial infarction (subcategory of acute coronary syndrome) | <ul style="list-style-type: none"> <li>• The term acute myocardial infarction (AMI) should be used when there is evidence of myocardial necrosis in a clinical setting consistent with myocardial ischemia.</li> <li>• Under these conditions, any one of the following criteria meets the diagnosis for AMI:             <ul style="list-style-type: none"> <li>○ Detection of a rise and/or fall of cardiac biomarker values [preferably cardiac troponin (cTn)] with at least one value above the 99th percentile upper reference limit (URL) and with at least one of the following:                 <ul style="list-style-type: none"> <li>– Symptoms of ischemia.</li> <li>– New or presumed new significant ST-segment–T wave (ST–T) changes or new left bundle branch block (LBBB).</li> <li>– Development of pathological Q waves in the electrocardiogram (ECG).</li> <li>– Imaging evidence of new loss of viable myocardium or new regional wall motion abnormality.</li> <li>– Identification of an intracoronary thrombus by angiography or autopsy.</li> </ul> </li> <li>○ Cardiac death with symptoms suggestive of myocardial ischemia and presumed new ischemic ECG changes or new LBBB but death occurred before cardiac biomarkers were obtained, or before cardiac biomarker values would be increased.</li> <li>○ Percutaneous coronary intervention (PCI)-related MI is arbitrarily defined by elevation of cTn values (&gt;5 x 99th percentile URL) in patients with normal baseline values (≤99th percentile URL) or a rise of cTn values &gt;20% if the baseline values are elevated and are stable or falling. In addition, either (i) symptoms suggestive of myocardial ischemia or (ii) new ischemic ECG changes or (iii) angiographic findings consistent with a procedural complication or (iv) imaging demonstration of new loss of viable myocardium or new regional wall motion abnormality are required.</li> <li>○ Stent thrombosis associated with MI when detected by coronary angiography or autopsy in the setting of myocardial ischemia and with a rise and/or fall of cardiac biomarker values with at least one value above the 99th percentile URL.</li> </ul> </li> <li>• Coronary artery bypass grafting (CABG)-related MI is arbitrarily defined by elevation of cardiac biomarker values (&gt;10 x 99th percentile URL) in patients with normal baseline cTn values (≤99th percentile URL). In addition, either (i) new pathological Q waves or new LBBB, or (ii) angiographic documented new graft or new native coronary artery occlusion, or (iii) imaging evidence of new loss of viable myocardium or new regional wall motion abnormality</li> </ul> |



|                                            |                                                                                                                                                                                                                                                                                                                                                                                                                                                                                                                                                                                                                                                                                                                                                                                                                                                                                                                                                                                                                                                                                                                                                                                                                                                                                                                                                                                                                                                                                                                                                                                                                                                                                                                                       |
|--------------------------------------------|---------------------------------------------------------------------------------------------------------------------------------------------------------------------------------------------------------------------------------------------------------------------------------------------------------------------------------------------------------------------------------------------------------------------------------------------------------------------------------------------------------------------------------------------------------------------------------------------------------------------------------------------------------------------------------------------------------------------------------------------------------------------------------------------------------------------------------------------------------------------------------------------------------------------------------------------------------------------------------------------------------------------------------------------------------------------------------------------------------------------------------------------------------------------------------------------------------------------------------------------------------------------------------------------------------------------------------------------------------------------------------------------------------------------------------------------------------------------------------------------------------------------------------------------------------------------------------------------------------------------------------------------------------------------------------------------------------------------------------------|
|                                            | <p>The totality of the clinical, electrocardiographic, and cardiac biomarker information should be considered to determine whether or not an AMI has occurred. Specifically, timing and trends in cardiac biomarkers and electrocardiographic information require careful analysis. The adjudication of AMI should also take into account the clinical setting in which the event occurs. AMI may be adjudicated for an event that has characteristics of an AMI but which does not meet the strict definition because biomarker or electrocardiographic results are not available.</p> <p><b>Biomarker elevations</b></p> <p>For cardiac biomarkers, laboratories should report an upper reference limit (URL). If the 99th percentile of the upper reference limit (URL) from the respective laboratory performing the assay is not available, then the URL the laboratory uses to diagnose myocardial infarction (decision limit) should be used. In general, troponins are preferred and take precedence over creatine kinase (CK)-MB when both biomarkers are available. CK-MB should be used if troponins are not available, and total CK may be used in the absence of CK-MB and troponin.</p> <p>Silent myocardial infarction: Silent MI is defined by the following:<br/>Asymptomatic patients who develop new pathologic Q-wave criteria for MI detected during routine ECG follow-up, or reveal evidence of MI by cardiac imaging that cannot be directly attributed to a coronary revascularization procedure, should be termed ‘silent MI’. The diagnosis of a new silent Q-wave MI should be confirmed by a repeat ECG or by an imaging study and by focused questioning about potential interim ischemic symptoms.</p> |
| Acute myocardial infarction categorization | <p>Since the prognostic significance of different types of myocardial infarctions (e.g., periprocedural myocardial infarction vs. spontaneous myocardial infarction) may be different, all AMI events will be categorized by subtype as outlined below and further described in the third Universal Definition for Myocardial Infarction referenced below.</p> <ul style="list-style-type: none"> <li>• Type 1: Spontaneous MI related to ischemia due to a primary coronary event such as plaque fissuring or rupturing.</li> <li>• Type 2: MI secondary to ischemia due to imbalance between oxygen demand and supplies, e.g., coronary spasm.</li> <li>• Type 3: Sudden cardiac death with symptoms of myocardial ischemia, accompanied by new ST elevation or LBBB, or verified coronary thrombus by angiography, but death occurring before blood samples could be obtained.</li> </ul>                                                                                                                                                                                                                                                                                                                                                                                                                                                                                                                                                                                                                                                                                                                                                                                                                                          |

|                                                                                                    |                                                                                                                                                                                                                                                                                                                                                                                                                                                                                                                                                                                                                                                                                                                                                                                                                                                                                                                                                                                                                                                                                                                                                                                                                                                                                                                                                                                                                                                                                                                                                                                                                                                                                                                                                                                                                                                                                                                                                                                                                                                                                                                                                                                                               |
|----------------------------------------------------------------------------------------------------|---------------------------------------------------------------------------------------------------------------------------------------------------------------------------------------------------------------------------------------------------------------------------------------------------------------------------------------------------------------------------------------------------------------------------------------------------------------------------------------------------------------------------------------------------------------------------------------------------------------------------------------------------------------------------------------------------------------------------------------------------------------------------------------------------------------------------------------------------------------------------------------------------------------------------------------------------------------------------------------------------------------------------------------------------------------------------------------------------------------------------------------------------------------------------------------------------------------------------------------------------------------------------------------------------------------------------------------------------------------------------------------------------------------------------------------------------------------------------------------------------------------------------------------------------------------------------------------------------------------------------------------------------------------------------------------------------------------------------------------------------------------------------------------------------------------------------------------------------------------------------------------------------------------------------------------------------------------------------------------------------------------------------------------------------------------------------------------------------------------------------------------------------------------------------------------------------------------|
|                                                                                                    | <ul style="list-style-type: none"> <li>• Type 4a: MI associated with percutaneous coronary intervention (PCI).</li> <li>• Type 4b: Stent thrombosis documented by angiography or autopsy.</li> <li>• Type 4c: Thrombosis not documented but restenosis is found by angiography or autopsy with no other obvious cause.</li> <li>• Type 5: MI associated with CABG</li> </ul>                                                                                                                                                                                                                                                                                                                                                                                                                                                                                                                                                                                                                                                                                                                                                                                                                                                                                                                                                                                                                                                                                                                                                                                                                                                                                                                                                                                                                                                                                                                                                                                                                                                                                                                                                                                                                                  |
| <p>Unstable angina pectoris requiring hospitalization (subcategory of acute coronary syndrome)</p> | <p>Unstable angina pectoris requiring hospitalization is defined as:</p> <ol style="list-style-type: none"> <li>1. Ischemic discomfort (angina, or symptoms thought to be equivalent) <math>\geq 10</math> minutes in duration occurring <ul style="list-style-type: none"> <li>• at rest, or</li> <li>• in an accelerating pattern with frequent episodes associated with progressively decreased exercise capacity.</li> </ul> </li> </ol> <p>AND</p> <ol style="list-style-type: none"> <li>2. Prompting an unscheduled hospitalization within 24 hours of the most recent symptoms. Hospitalization is defined as an admission to an inpatient unit or a visit to an emergency department that results in at least a 24-hour stay (or a change in calendar date if the hospital admission or discharge times are not available).</li> </ol> <p>AND</p> <ol style="list-style-type: none"> <li>3. At least one of the following: <ol style="list-style-type: none"> <li>a. New or worsening ST or T wave changes on resting ECG (in the absence of confounders, such as LBBB or LVH) transient ST elevation (duration <math>&lt;20</math> minutes).<br/> New ST elevation at the J point in two contiguous leads with the cut-points: <math>\geq 0.1</math> mV in all leads other than leads V2–V3 where the following cut-points apply: <math>\geq 0.2</math> mV in men <math>\geq 40</math> years (<math>\geq 0.25</math> mV in men <math>&lt;40</math> years) or <math>\geq 0.15</math> mV in women.<br/> ST depression and T-wave changes: New horizontal or down-sloping ST depression <math>\geq 0.05</math> mV in two contiguous leads and/or new T inversion <math>\geq 0.3</math> mV in two contiguous leads with prominent R wave or R/S ratio <math>&gt;1</math>.</li> <li>b. Definite evidence of inducible myocardial ischemia as demonstrated by:<br/> an early positive exercise stress test, defined as ST elevation or <math>\geq 2</math> mm ST depression prior to 5 metabolic equivalents of tasks (METs)<br/> OR<br/> stress echocardiography (reversible wall motion abnormality)<br/> OR<br/> myocardial scintigraphy (reversible perfusion defect),<br/> OR</li> </ol> </li> </ol> |

|                          |                                                                                                                                                                                                                                                                                                                                                                                                                                                                                                                                                                                                                                                                                                                                                                                                                                                                                                                                                                                                                                                                                                                                                                       |
|--------------------------|-----------------------------------------------------------------------------------------------------------------------------------------------------------------------------------------------------------------------------------------------------------------------------------------------------------------------------------------------------------------------------------------------------------------------------------------------------------------------------------------------------------------------------------------------------------------------------------------------------------------------------------------------------------------------------------------------------------------------------------------------------------------------------------------------------------------------------------------------------------------------------------------------------------------------------------------------------------------------------------------------------------------------------------------------------------------------------------------------------------------------------------------------------------------------|
|                          | <p>MRI (myocardial perfusion deficit under pharmacologic stress), and believed to be responsible for the myocardial ischemic symptoms/signs.</p> <p>c. Angiographic evidence of new or worse <math>\geq 70\%</math> lesion and/or thrombus in an epicardial coronary artery that is believed to be responsible for the myocardial ischemic symptoms/signs.</p> <p>d. Need for coronary revascularization procedure (PCI or CABG) for the presumed culprit lesion(s). This criterion would be fulfilled if revascularization was undertaken during the unscheduled hospitalization, or subsequent to transfer to another institution without interceding home discharge.</p> <p>AND</p> <p>4. Negative cardiac biomarkers and no evidence of acute MI.</p>                                                                                                                                                                                                                                                                                                                                                                                                             |
| Stroke                   | <p>Stroke is defined as an acute episode of focal or global neurological dysfunction caused by brain, spinal cord, or retinal vascular injury as a result of hemorrhage or infarction. An event will only meet the criteria for a stroke if:</p> <ul style="list-style-type: none"> <li>• Symptoms are present for more than 24 hours</li> </ul> <p>OR</p> <ul style="list-style-type: none"> <li>• Imaging evidence consistent with stroke is identified in a patient with neurological symptoms present for less than 24 hours</li> </ul>                                                                                                                                                                                                                                                                                                                                                                                                                                                                                                                                                                                                                           |
| Classification of stroke | <p>A. Ischemic stroke<br/>Ischemic stroke is defined as an acute episode of focal cerebral, spinal, or retinal dysfunction caused by infarction of central nervous system tissue. Hemorrhage may be a consequence of ischemic stroke. In this situation, the stroke is an ischemic stroke with hemorrhagic transformation and not a hemorrhagic stroke.</p> <p>B. Hemorrhagic stroke<br/>Hemorrhagic stroke is defined as an acute episode of focal or global cerebral or spinal dysfunction caused by intraparenchymal, intraventricular, or subarachnoid hemorrhage. Subdural hematomas are intracranial hemorrhagic events and not strokes.</p> <p>C. Undetermined stroke<br/>Undetermined stroke is defined as an acute episode of focal or global neurological dysfunction caused by presumed brain, spinal cord, or retinal vascular injury as a result of hemorrhage or infarction but with insufficient information to allow categorization as A or B.</p> <p>Stroke is documented by imaging (e.g., CT or MRI scan). Evidence obtained from autopsy can also confirm the diagnosis. Findings on lumbar puncture can also be supportive to the diagnosis.</p> |
| Fatal event              | <p>Causes of death events will initially be identified as either “Known” or “Unknown”.</p> <p>If classified as “Unknown”, the event will be considered a CV death and no further adjudication of the event will be performed.</p>                                                                                                                                                                                                                                                                                                                                                                                                                                                                                                                                                                                                                                                                                                                                                                                                                                                                                                                                     |

|  |                                                                                                                                                                                                                                                                                                                                                                                                                                                                                                                                                                                                                                                                                                                                                                                                                                                                                                                                                                                                                                                                                                                                                                                                                                                                                                                                                                                                                                                                                                                                                                                 |
|--|---------------------------------------------------------------------------------------------------------------------------------------------------------------------------------------------------------------------------------------------------------------------------------------------------------------------------------------------------------------------------------------------------------------------------------------------------------------------------------------------------------------------------------------------------------------------------------------------------------------------------------------------------------------------------------------------------------------------------------------------------------------------------------------------------------------------------------------------------------------------------------------------------------------------------------------------------------------------------------------------------------------------------------------------------------------------------------------------------------------------------------------------------------------------------------------------------------------------------------------------------------------------------------------------------------------------------------------------------------------------------------------------------------------------------------------------------------------------------------------------------------------------------------------------------------------------------------|
|  | <p>If “Known” is selected, the Adjudicator will then be prompted to rate the likelihood that the death can be classified as a CV-related death event, by making one of the following selections for CV-related death:</p> <ol style="list-style-type: none"><li>1. Documented</li><li>2. Probable/Possible, or</li><li>3. Unlikely</li></ol> <p>If “Documented” or “Probable/Possible” is selected, the death event will be classified as CV related and the adjudicator will be asked to indicate the cause of cardiovascular death from the list below:</p> <ul style="list-style-type: none"><li>• Sudden cardiac death</li><li>• Acute MI</li><li>• Heart failure</li><li>• Cerebrovascular event</li><li>• Cardiovascular procedures</li><li>• Cardiovascular hemorrhage</li><li>• Other CV causes</li></ul> <p>If “Unlikely” is selected, the adjudicator will be asked to indicate the cause of death from the list below:</p> <ul style="list-style-type: none"><li>• Pulmonary causes</li><li>• Renal causes</li><li>• Gastrointestinal (GI) causes</li><li>• Hepatobiliary causes</li><li>• Pancreatic causes</li><li>• Infection (including sepsis)</li><li>• Non-infectious (e.g., systemic inflammatory response syndrome [SIRS])</li><li>• Hemorrhage that is neither cardiovascular bleeding or stroke</li><li>• Non-CV procedure or surgery</li><li>• Trauma</li><li>• Suicide</li><li>• Non-prescription drug reaction or overdose</li><li>• Prescription drug reaction or overdose</li><li>• Neurological (non-cardiovascular)</li><li>• Malignancy</li></ul> |
|--|---------------------------------------------------------------------------------------------------------------------------------------------------------------------------------------------------------------------------------------------------------------------------------------------------------------------------------------------------------------------------------------------------------------------------------------------------------------------------------------------------------------------------------------------------------------------------------------------------------------------------------------------------------------------------------------------------------------------------------------------------------------------------------------------------------------------------------------------------------------------------------------------------------------------------------------------------------------------------------------------------------------------------------------------------------------------------------------------------------------------------------------------------------------------------------------------------------------------------------------------------------------------------------------------------------------------------------------------------------------------------------------------------------------------------------------------------------------------------------------------------------------------------------------------------------------------------------|

|                     |                                                                                                                                                                                                                                                                                                                                                                               |
|---------------------|-------------------------------------------------------------------------------------------------------------------------------------------------------------------------------------------------------------------------------------------------------------------------------------------------------------------------------------------------------------------------------|
|                     | <ul style="list-style-type: none"><li>• Other non-cardiovascular</li></ul>                                                                                                                                                                                                                                                                                                    |
| Severe hypoglycemia | An episode requiring assistance of another person to actively administer carbohydrate, glucagon, or take other corrective actions. Plasma glucose values may not be available during an event, but neurological recovery following the return of plasma glucose to normal is considered sufficient evidence that the event was induced by a low plasma glucose concentration. |

## **Interim analysis data access management plan**

Access to the unblinded data output and results was limited to an external independent statistics group at Statistics Collaborative Inc., the interim reporting team at Novo Nordisk (which consisted of 12 employees), the independent external data monitoring committee, a small IT team and designated medical writers. The interim reporting team had no further participation in the conduct of the ongoing trial, were physically separated from all other employees and worked on a separate secured network.

The unblinded data seen by this team were restricted to the snapshot of cardiovascular, hypoglycemic and adverse events only, and baseline characteristics data collected until the interim database lock.

The following groups of individuals did not have access to the interim data: the DEVOTE Steering Committee, the Event Adjudication Committee, trial investigators; the Novo Nordisk DEVOTE operational team; or the Novo Nordisk Executive Management team.

## Rationale for the 1.3 and 1.8 thresholds

The 2008 FDA “*Guidance for Industry. Diabetes Mellitus – Evaluating Cardiovascular Risk in New Antidiabetic Therapies to Treat Type 2 Diabetes*” stipulates the need to establish cardiovascular safety prior to approval of a new therapy.<sup>1</sup> For a new therapy to be considered approvable, the data need to show that the upper bound of the two-sided 95% confidence interval for the hazard ratio is <1.8. If it is between 1.3 and 1.8, and the overall risk–benefit analysis supports approval, a post-marketing trial generally will be necessary to specifically confirm cardiovascular safety. If the data demonstrate that the upper bound of the two-sided 95% confidence interval for the hazard ratio is <1.3 and the overall risk–benefit analysis supports approval, a post-marketing trial is not necessary.

Further to the above guidance, it was discussed at the FDA Confidentiality Of Interim Results In Cardiovascular Outcome Safety Trials public hearing in 2014 that a cardiovascular trial should be designed to rule out the 1.3 margin, but the interim analysis, if conducted, should serve as the basis of determining whether or not the 1.8 margin is ruled out.<sup>2</sup>

It is based on this guidance from the FDA that the two thresholds were used for DEVOTE.

### References

1. US Department of Health and Human Services Food and Drug Administration Center for Drug Evaluation and Research (CDER). *Guidance for Industry: Diabetes Mellitus – Evaluating Cardiovascular Risk in New Antidiabetic Therapies to Treat Type 2 Diabetes*. December 2008. <http://www.fda.gov/downloads/Drugs/GuidanceComplianceRegulatoryInformation/Guidances/ucm071627.pdf>
2. U.S. Food & Drug Administration (FDA). *Confidentiality Of Interim Results In Cardiovascular Outcome Safety Trials*. Public Hearing. August 2014. <https://www.fda.gov/downloads/Drugs/NewsEvents/UCM436369.pdf>

**Figure S1:** Trial design

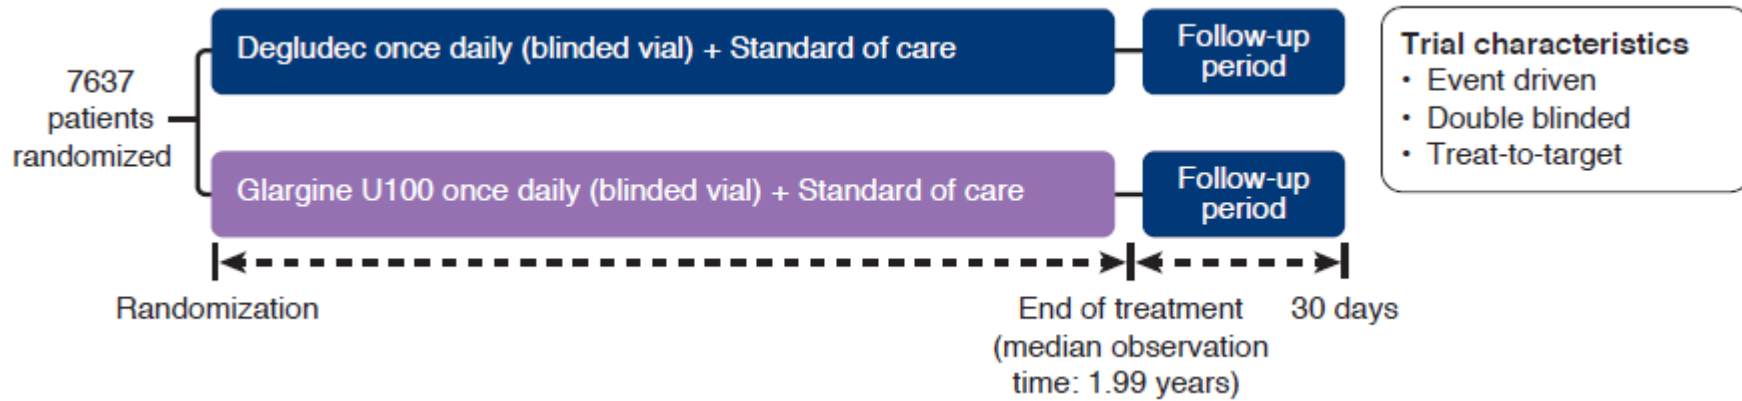

U100, 100 units/mL.



**Figure S2:** Patient disposition

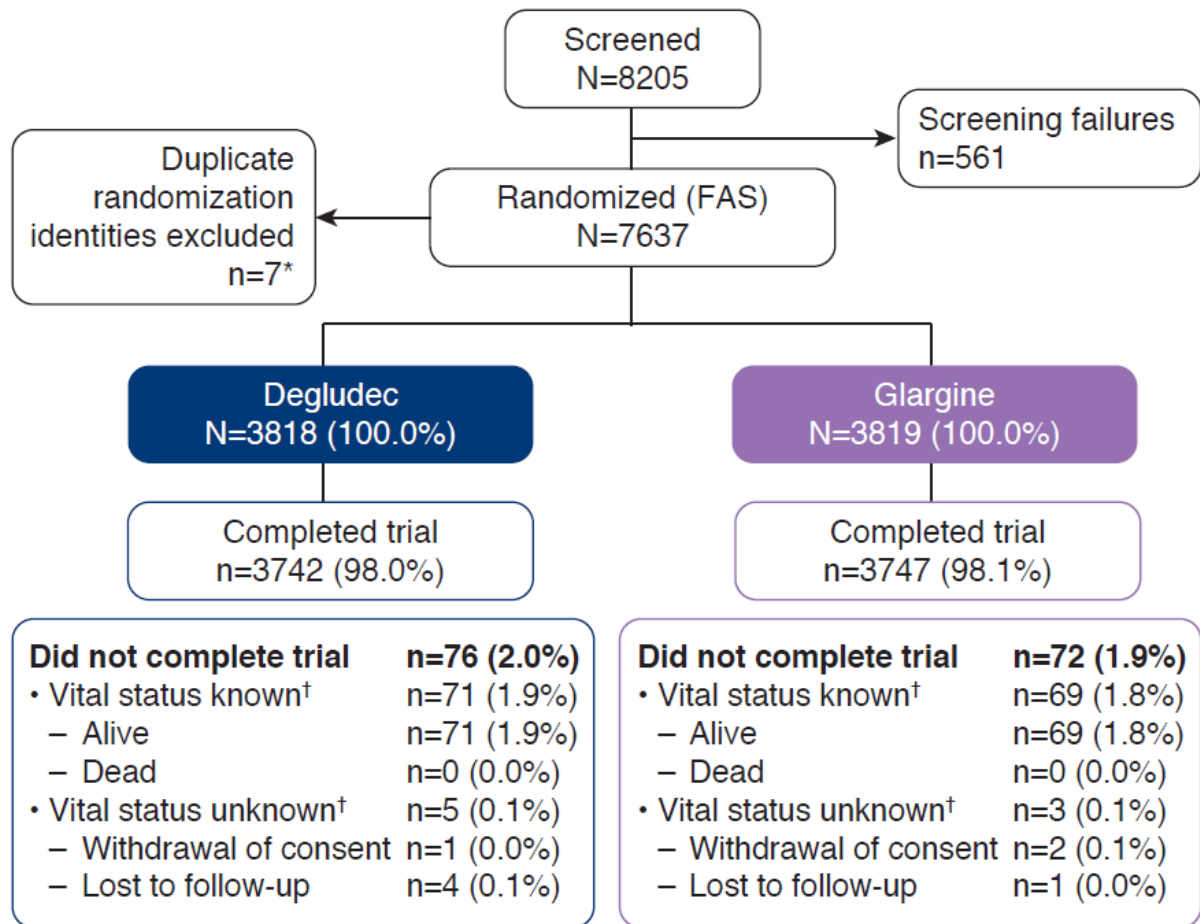

Completed trial: follow-up visit completed or died during trial. Full analysis set: all randomized patients.

\*7644 patients were randomized in total. Of these, seven patients were randomized at two different sites. Data from the second site were not included in the full analysis set. †Status during trial closure: from the first patient's follow-up visit (29 Jun 2016) to the actual last patient/last visit (16 Oct 2016). FAS, full analysis set.

**Figure S3:** Major adverse cardiovascular event sensitivity analyses

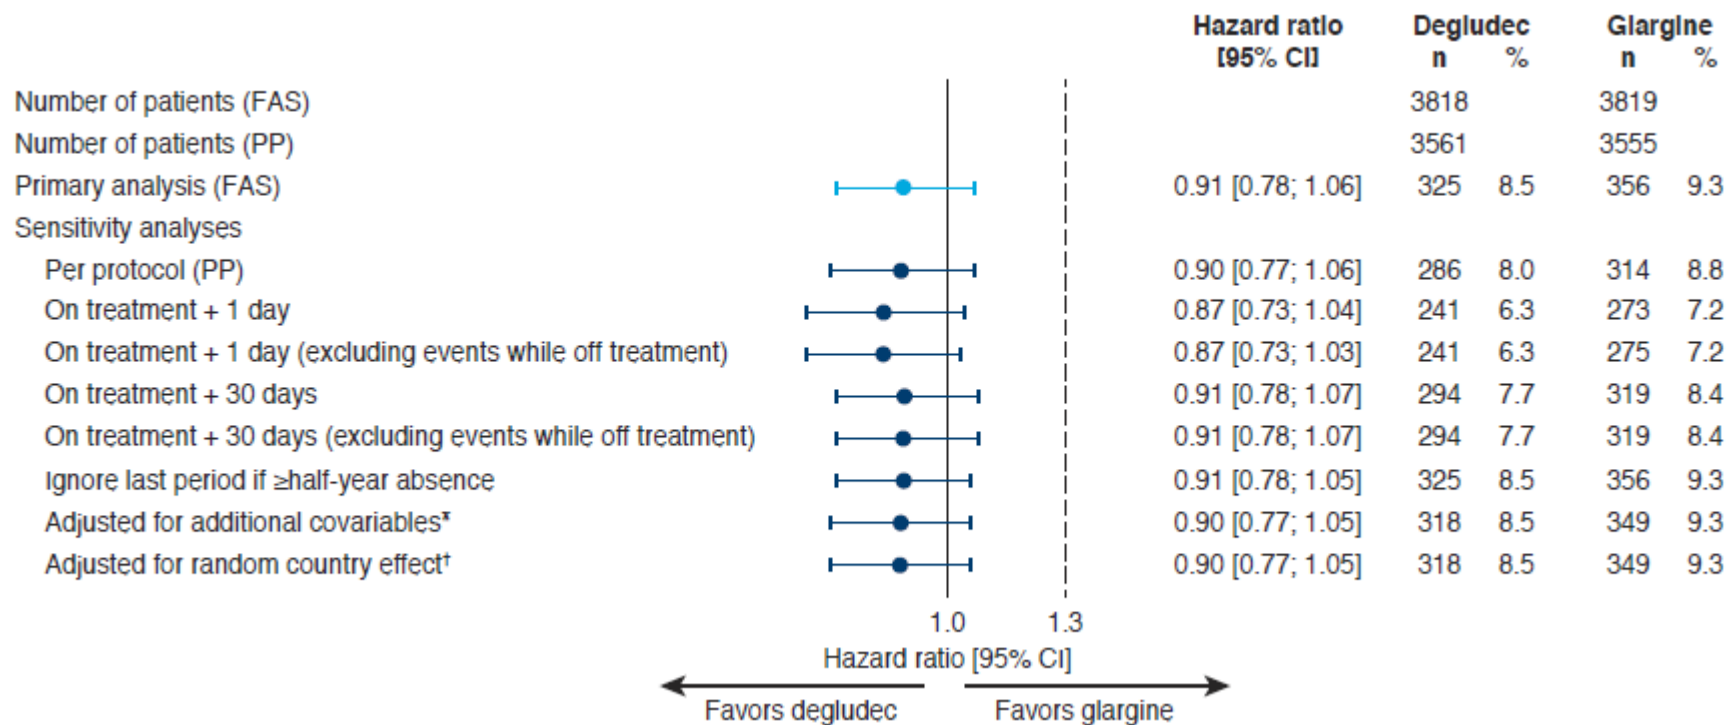

\*Fixed-effect covariables include: investigational medicinal product, sex, region, baseline age, smoking status at baseline, diabetes duration at baseline, cardiovascular risk, insulin-naïve at baseline and renal function eGFR at baseline; †Includes country plus \*; Ignore last period if ≥half-year absence: in case of no patient-site contact for a six month period prior to follow-up visit the patient is censored at last contact prior to follow-up.

CI, confidence interval; CV, cardiovascular; eGFR, estimated glomerular filtration rate; FAS, full analysis set; n, number of patients; PP, per protocol; %, proportion of patients.

**Figure S4: Major adverse cardiovascular events subgroup analyses**

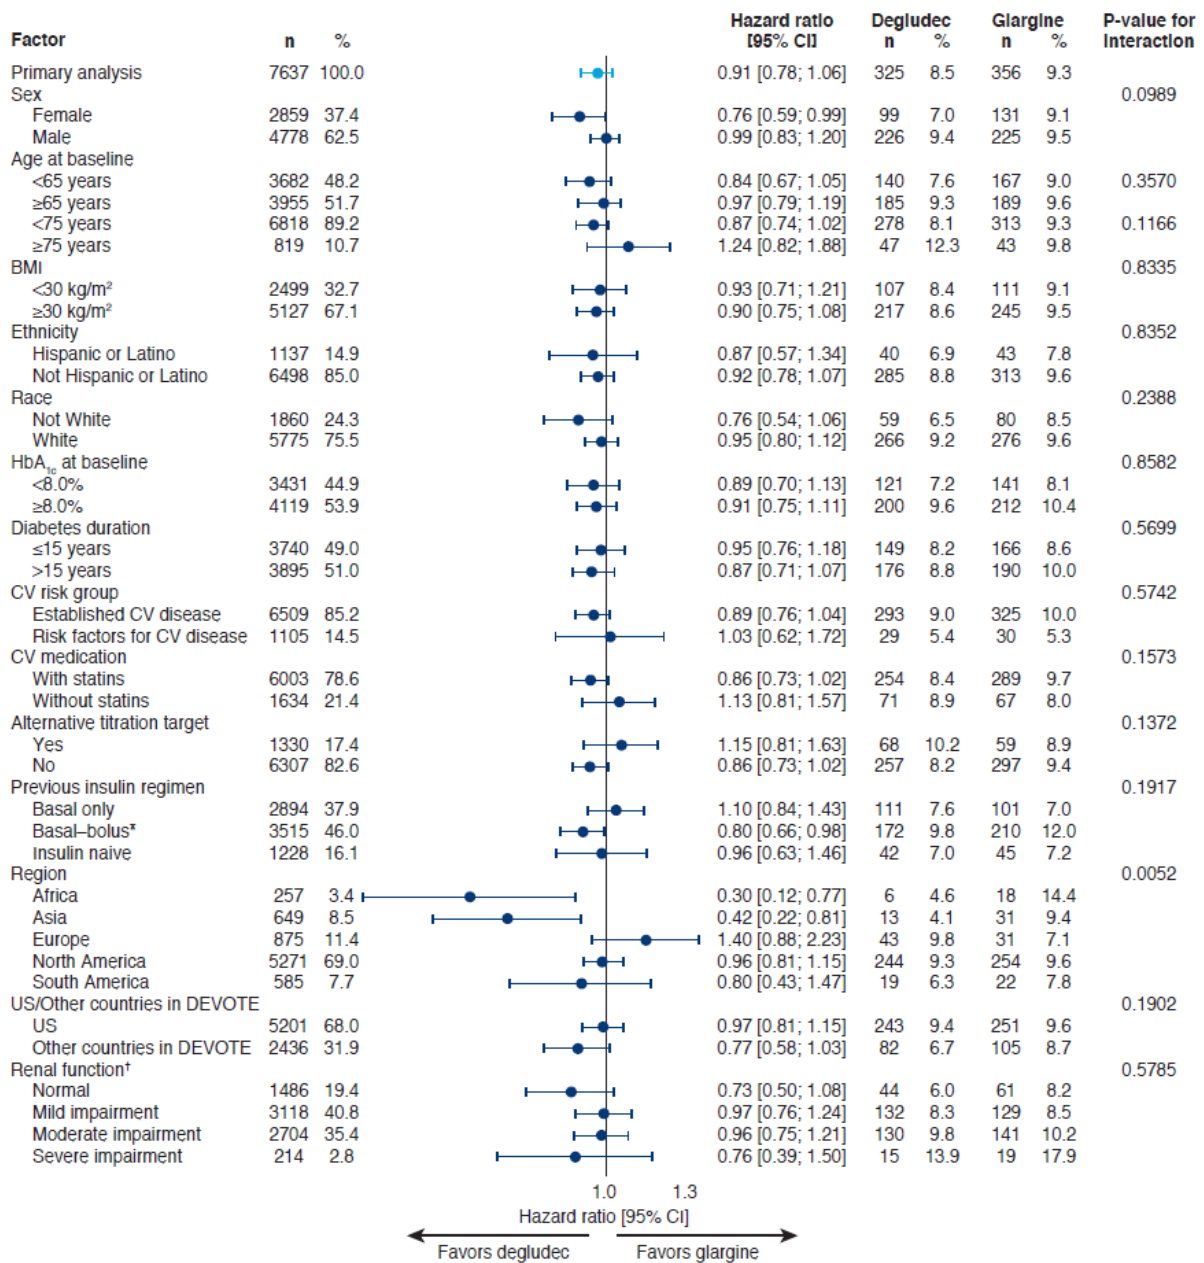

\*Includes basal-bolus, bolus only and premix; †As per CKD-EPI.

BMI, body mass index; CI, confidence interval; CKD-EPI, chronic kidney disease epidemiology collaboration; CV, cardiovascular; n, number of patients; US, United States; %, proportion of patients.

**Figure S5:** Time to first Event Adjudication Committee-confirmed 4-point major adverse cardiovascular event and individual components

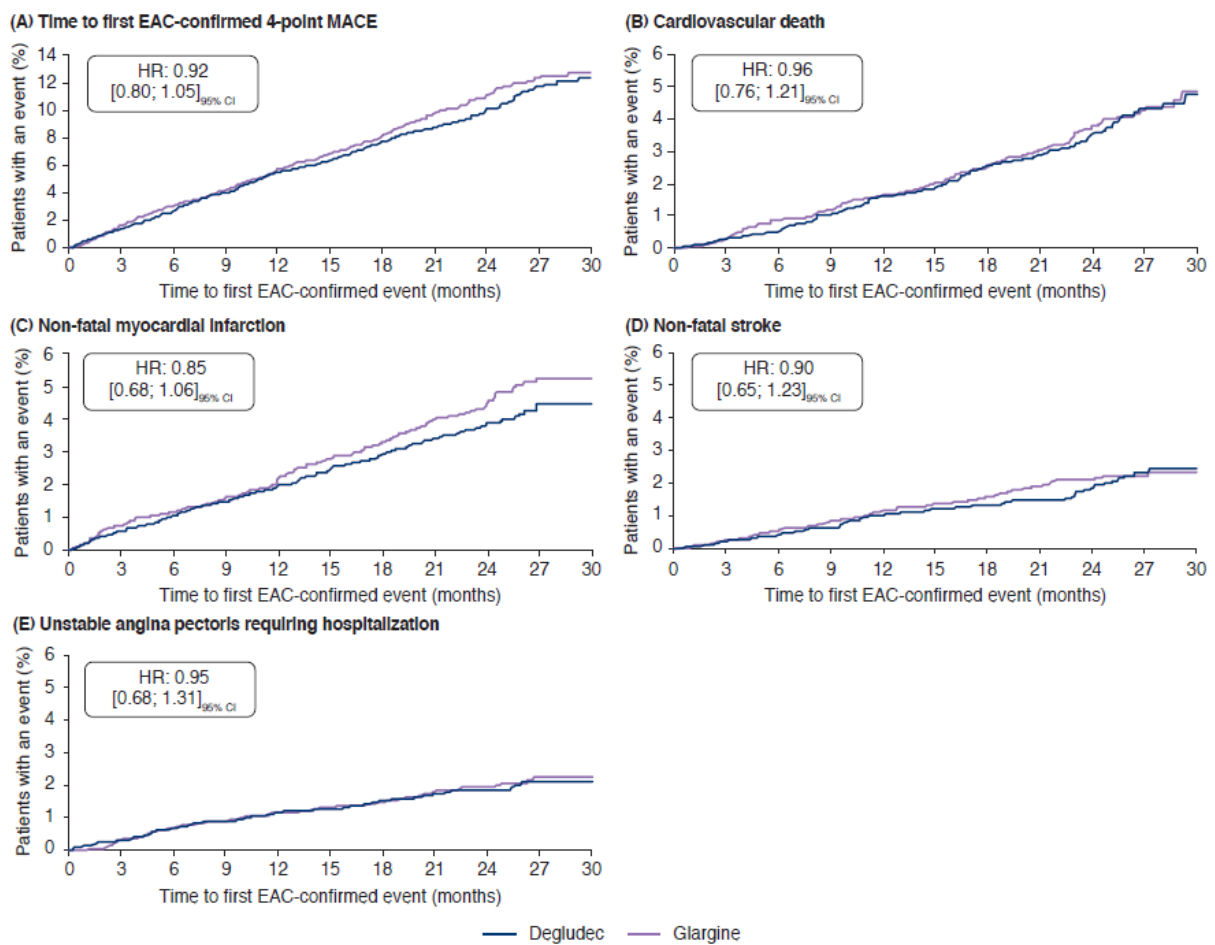

Full analysis set (all randomized patients); Kaplan–Meier plots of time to EAC-confirmed cardiovascular events. Cox regression analysis accounting for treatment. Analysis includes events between randomization date and follow-up date. Patients without an event are censored at the time of last contact (phone or visit).

CI, confidence interval; EAC, Event Adjudication Committee; HR, hazard ratio; MACE, major adverse cardiovascular event.

**Figure S6:** Severe hypoglycemic events with and without blood glucose measurements

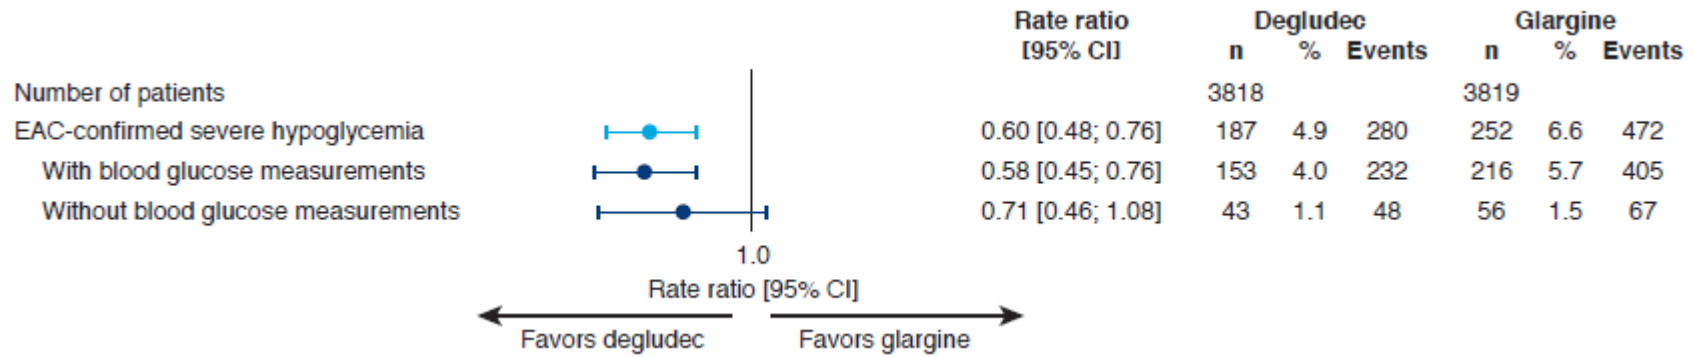

CI, confidence interval; EAC, Event Adjudication Committee; n, number of patients; %, proportion of patients.

**Figure S7:** Severe hypoglycemia on-treatment sensitivity analyses

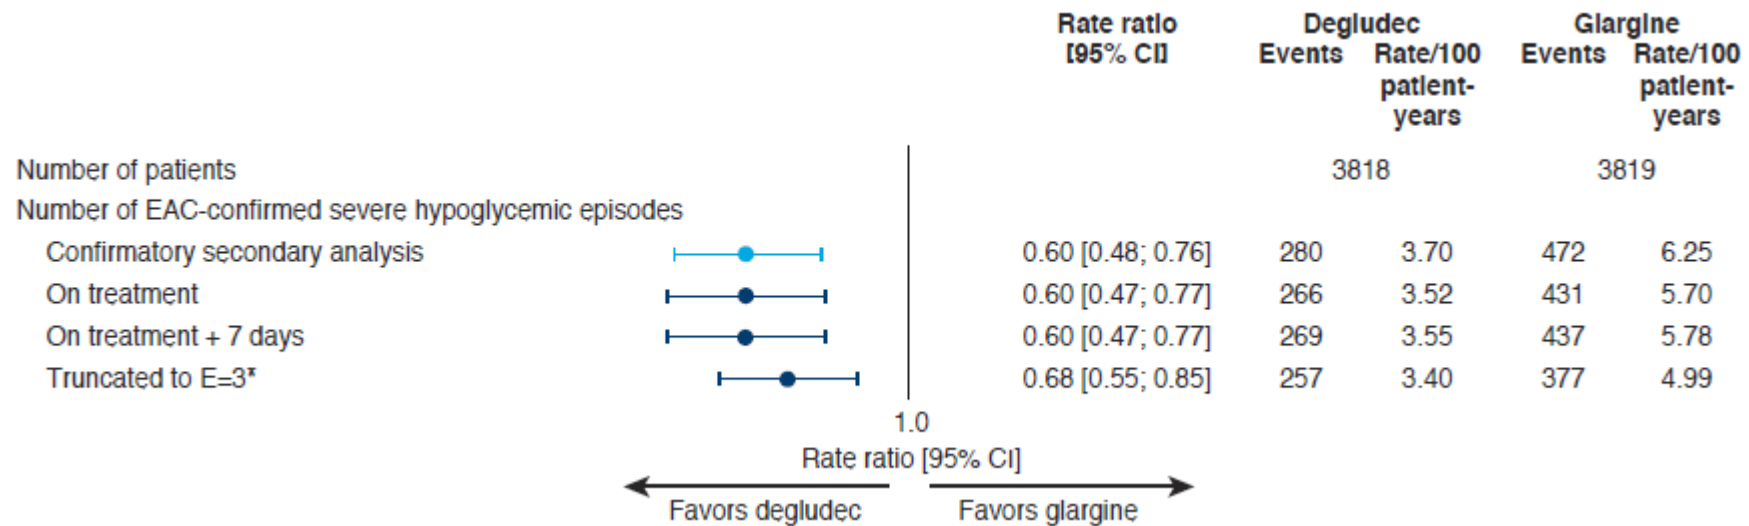

\*>3 episodes truncated to 3 episodes. Full analysis set (all randomized patients); negative binomial regression model with log-link function and the logarithm of the duration of the observation time (primary analysis) or exposure time (sensitivity analyses) as offset.

CI, confidence interval; EAC, Event Adjudication Committee.

**Figure S8:** Incidence of severe hypoglycemia on-treatment sensitivity analyses

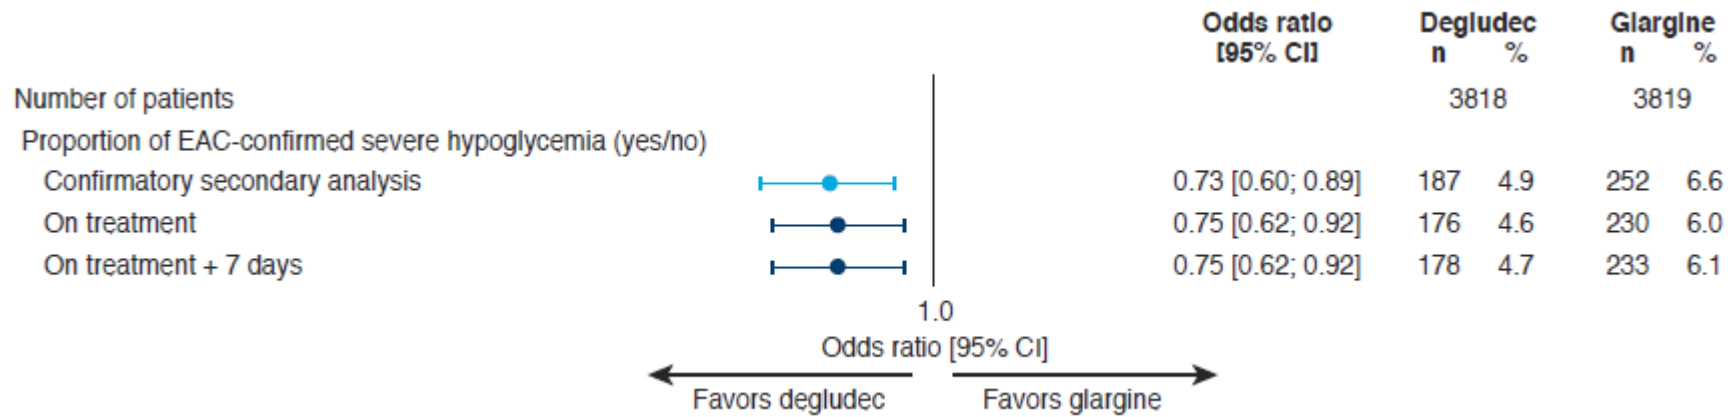

Full analysis set (all randomized patients); logistic regression model with treatment (degludec vs. glargine) as a fixed factor.

CI, confidence interval; EAC, Event Adjudication Committee; n, number of patients; %, proportion of patients.

**Figure S9:** Incidence of severe hypoglycemia subgroup analyses

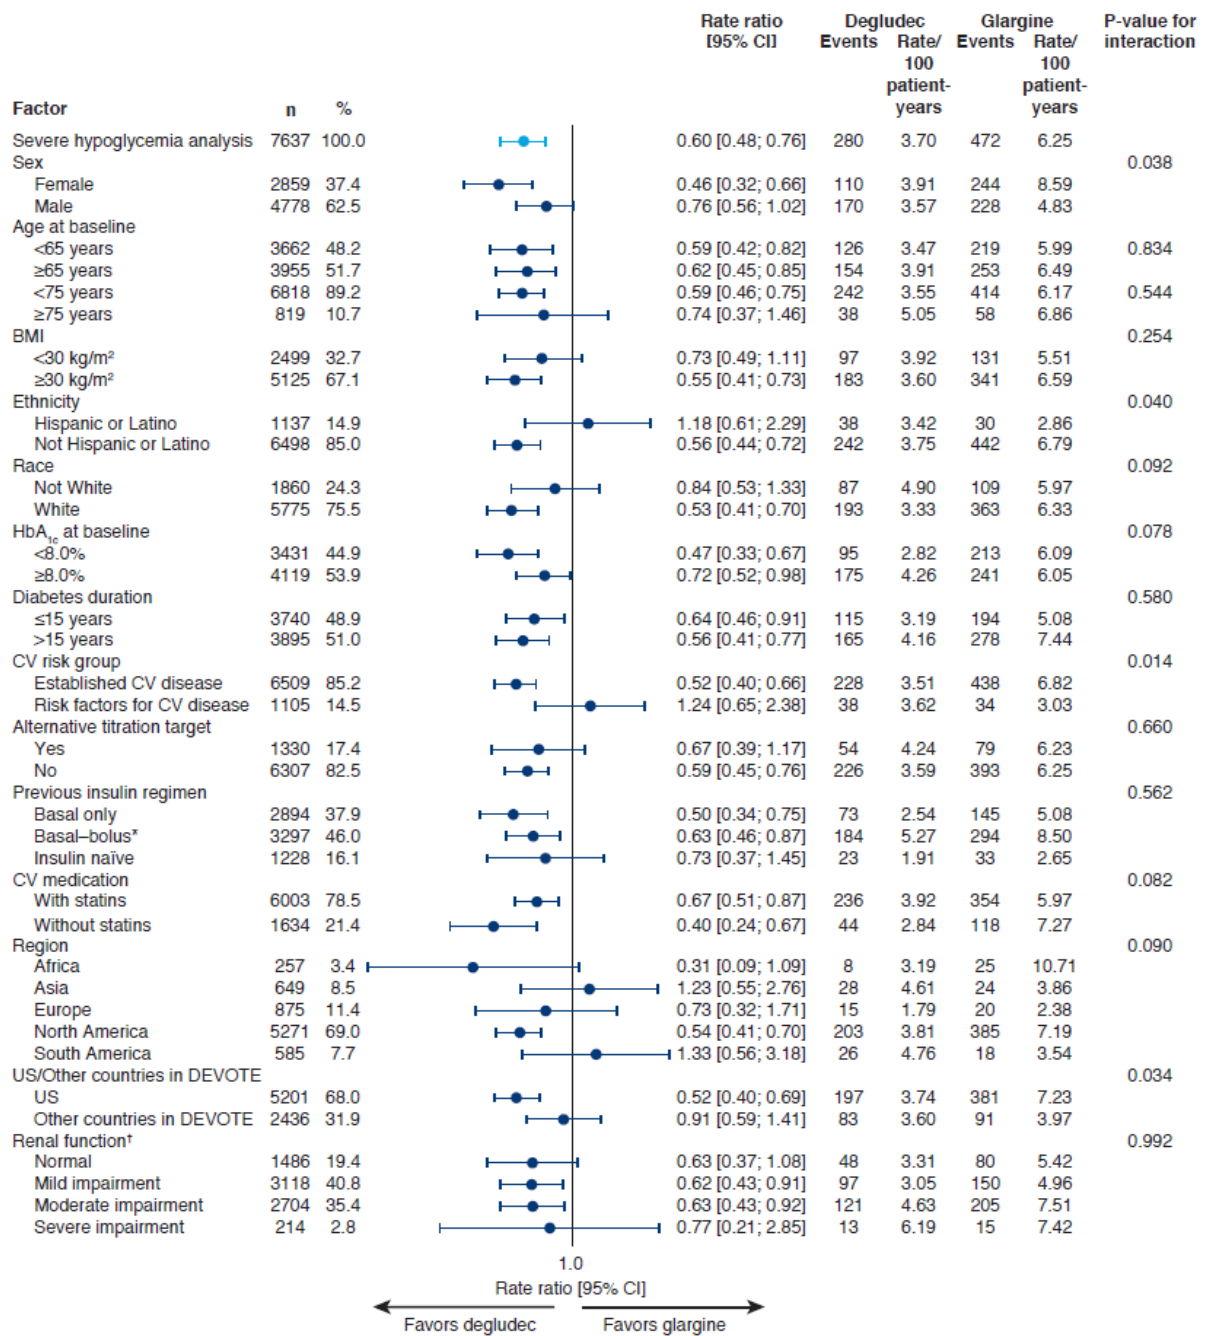

\*Includes basal-bolus, bolus only and premix; †As per CKD-EPI.

BMI, body mass index; CI, confidence interval; CKD-EPI, chronic kidney disease epidemiology collaboration; CV, cardiovascular; n, number of patients; US, United States; %, proportion of patients.



**Figure S10:** Daily bolus insulin dose over time (units)

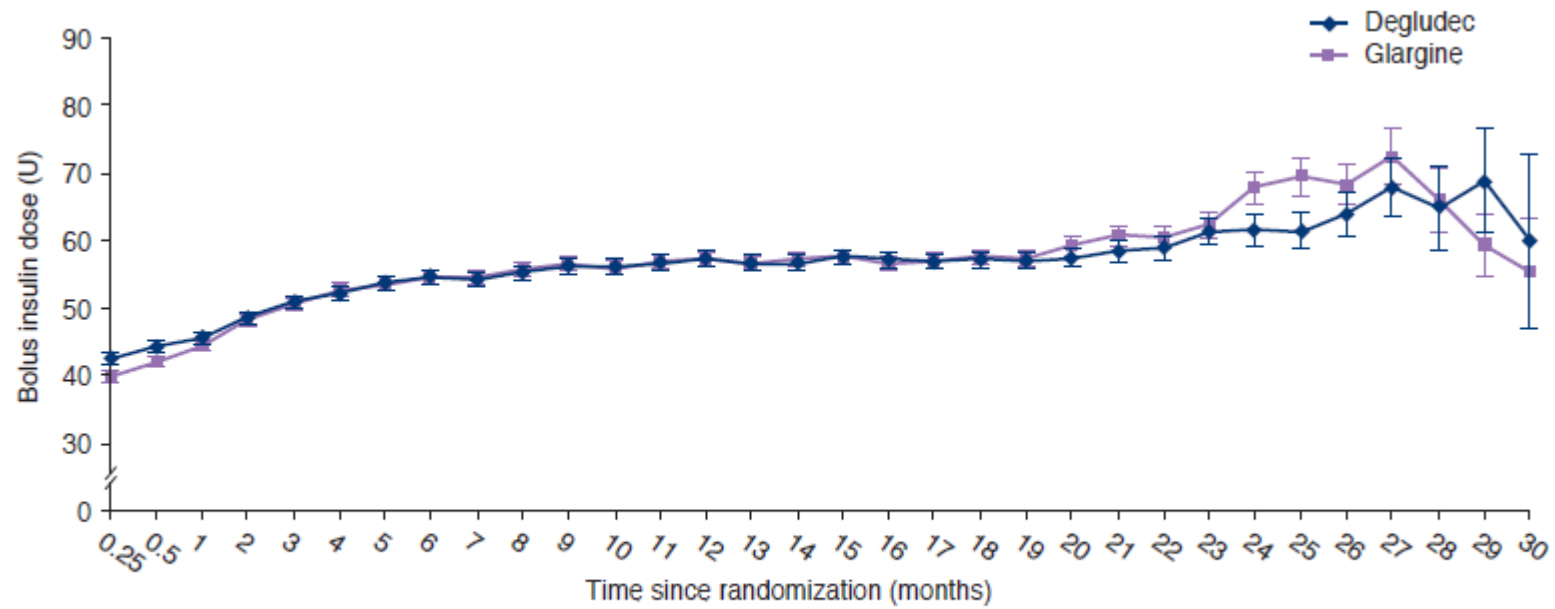

|              |      |      |      |      |     |    |
|--------------|------|------|------|------|-----|----|
| Degludec (n) | 1785 | 1858 | 1856 | 1859 | 645 | 29 |
| Glargine (n) | 1804 | 1890 | 1919 | 1895 | 658 | 33 |

Full analysis set (all randomized patients). n, number of patients.

**Figure S11:** Daily basal insulin dose over time (units/kg)

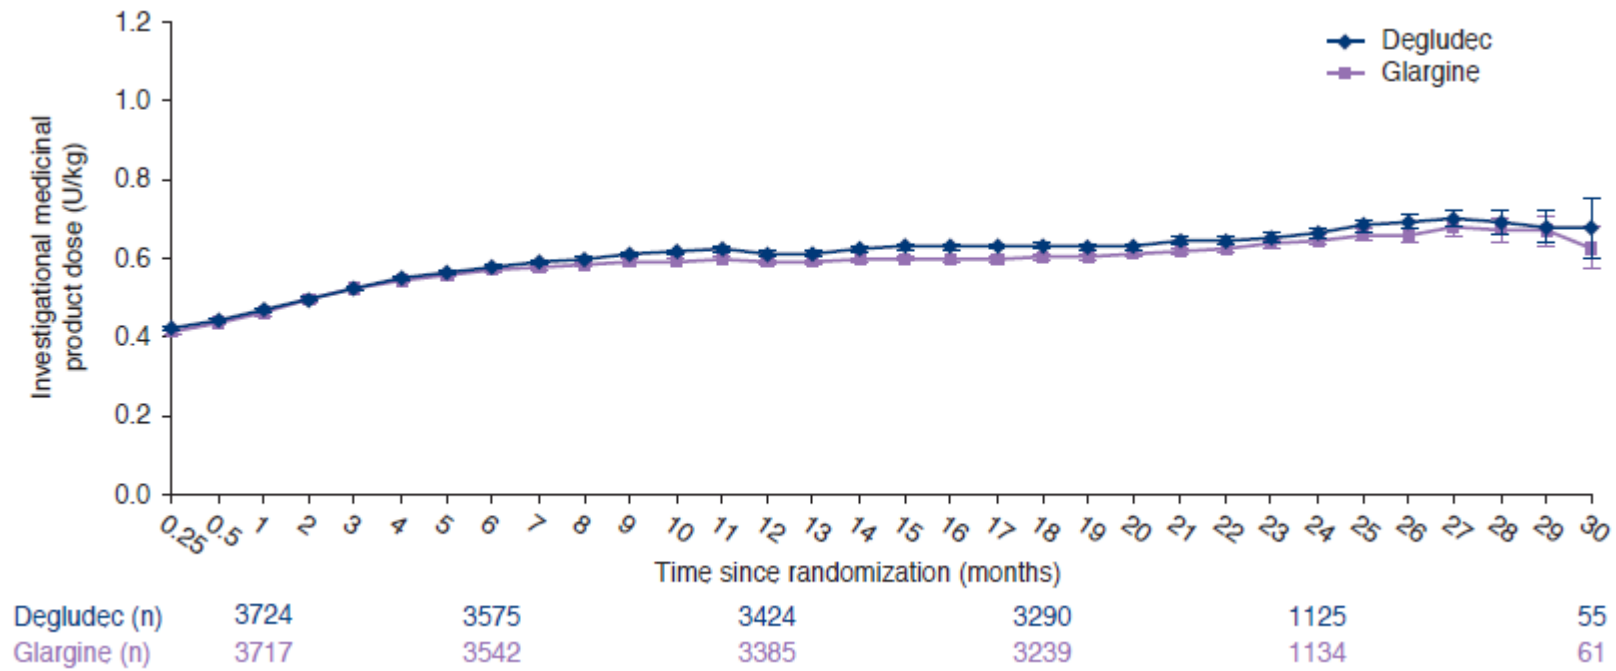

Full analysis set (all randomized patients). n, number of patients.

**Figure S12:** Pre-breakfast self-measured plasma glucose over time

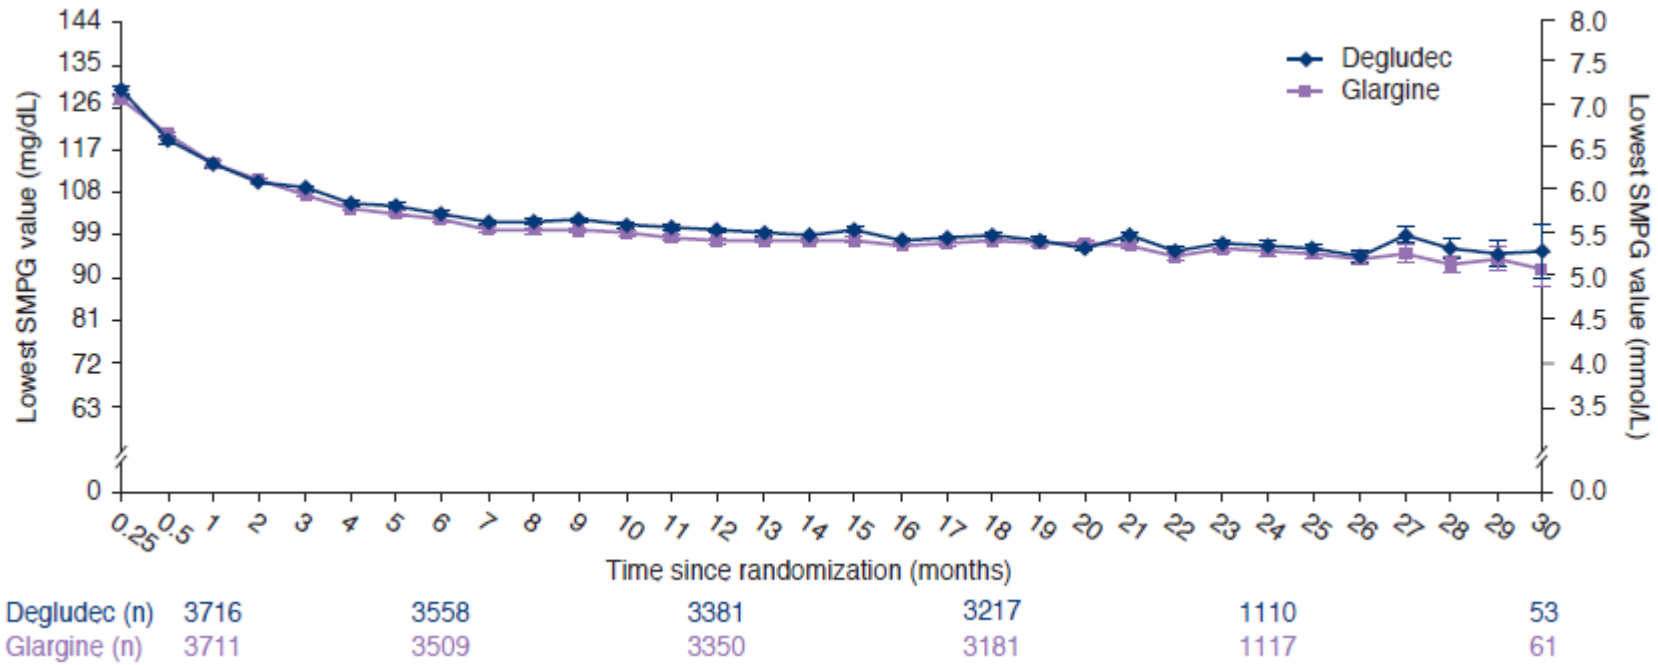

Full analysis set (all randomized patients). n, number of patients; SMPG, self-measured plasma glucose.

**Table S1:** Titration algorithms

| <b>Lowest of three pre-breakfast SMPG values</b>           |               | <b>Basal insulin adjustment</b> |
|------------------------------------------------------------|---------------|---------------------------------|
| <b>mg/dL</b>                                               | <b>mmol/L</b> | <b>Units</b>                    |
| <71                                                        | <4.0          | -2                              |
| 71-90                                                      | 4.0-5.0       | 0                               |
| 91-126                                                     | 5.1-7.0       | +2                              |
| >126                                                       | >7.0          | +4                              |
| <b>Lowest of three pre-prandial or bedtime SMPG values</b> |               | <b>Bolus insulin adjustment</b> |
| <b>mg/dL</b>                                               | <b>mmol/L</b> | <b>Units</b>                    |
| <71                                                        | <4.0          | -2                              |
| 71-126                                                     | 4.0-7.0       | 0                               |
| >126                                                       | >7.0          | +2                              |

SMPG, self-measured plasma glucose.

**Table S2:** Baseline characteristics

|                           | <b>Degludec<br/>n=3818</b> | <b>Glargine<br/>n=3819</b> |
|---------------------------|----------------------------|----------------------------|
| Age (years)               | 64.9 ± 7.3                 | 65.0 ± 7.5                 |
| Patients aged ≥75 years   | 381 (10.0)                 | 438 (11.5)                 |
| Men                       | 2396 (62.8)                | 2382 (62.4)                |
| Ethnicity                 |                            |                            |
| Hispanic or Latino        | 582 (15.2)                 | 555 (14.5)                 |
| Race                      |                            |                            |
| White                     | 2903 (76.0)                | 2872 (75.2)                |
| Black or African American | 401 (10.5)                 | 431 (11.3)                 |
| Asian                     | 391 (10.2)                 | 385 (10.1)                 |
| Other                     | 123 (3.2)                  | 131 (3.4)                  |
| Region                    |                            |                            |
| North America             | 2625 (68.8)                | 2646 (69.3)                |
| Europe                    | 438 (11.5)                 | 437 (11.4)                 |
| South America             | 304 (8.0)                  | 281 (7.4)                  |
| India                     | 168 (4.4)                  | 189 (4.9)                  |
| Asia excluding India      | 151 (4.0)                  | 141 (3.7)                  |
| Africa                    | 132 (3.5)                  | 125 (3.3)                  |
| Diabetes duration (years) | 16.6 ± 8.8                 | 16.2 ± 8.9                 |
| Smoking status            |                            |                            |
| Current                   | 431 (11.3)                 | 421 (11.0)                 |
| Previous                  | 1696 (44.4)                | 1657 (43.4)                |
| Never                     | 1690 (44.3)                | 1740 (45.6)                |

|                                                                                 |             |             |
|---------------------------------------------------------------------------------|-------------|-------------|
| Renal status                                                                    |             |             |
| Normal renal function<br>(eGFR $\geq$ 90 mL/min/1.73m <sup>2</sup> per CKD-EPI) | 740 (19.4)  | 746 (19.5)  |
| Mild renal impairment<br>(eGFR 60–89 mL/min/1.73m <sup>2</sup> per CKD-EPI)     | 1596 (41.8) | 1522 (39.9) |
| Moderate renal impairment<br>(eGFR 30–59 mL/min/1.73m <sup>2</sup> per CKD-EPI) | 1321 (34.6) | 1383 (36.2) |
| Severe renal impairment<br>(eGFR $<$ 30 mL/min/1.73m <sup>2</sup> per CKD-EPI)  | 108 (2.8)   | 106 (2.8)   |
| Trial eligibility stratum                                                       |             |             |
| Age $\geq$ 50 years and established cardiovascular or chronic kidney disease†   | 3265 (85.5) | 3244 (84.9) |
| Established chronic kidney disease only                                         | 525 (16.1)  | 510 (15.7)  |
| Established cardiovascular disease only                                         | 2068 (63.3) | 2051 (63.2) |
| Established cardiovascular AND chronic kidney disease                           | 672 (20.6)  | 683 (21.1)  |
| Age $\geq$ 60 years and risk factors for cardiovascular disease‡                | 538 (14.1)  | 567 (14.8)  |
| Alternative titration target                                                    |             |             |
| Alternative titration target at baseline                                        | 665 (17.4)  | 665 (17.4)  |
| Switched to alternative titration target after baseline                         | 368 (9.6)   | 337 (8.8)   |
| Antihyperglycemic treatment (excluding                                          |             |             |

|                                                        |             |             |
|--------------------------------------------------------|-------------|-------------|
| insulins)                                              |             |             |
| Metformin                                              | 2294 (60.1) | 2270 (59.4) |
| Sulfonylurea                                           | 1118 (29.3) | 1111 (29.1) |
| Alpha-glucosidase inhibitors                           | 63 (1.7)    | 70 (1.8)    |
| Thiazolidinedione                                      | 145 (3.8)   | 123 (3.2)   |
| Dipeptidyl peptidase-4 inhibitors                      | 463 (12.1)  | 480 (12.6)  |
| Glucagon-like peptide-1 receptor agonists              | 300 (7.9)   | 304 (8.0)   |
| Sodium-dependent glucose transporter-2 inhibitors      | 82 (2.1)    | 86 (2.3)    |
| Others                                                 | 50 (1.3)    | 68 (1.8)    |
| Insulins                                               |             |             |
| Not on insulin at baseline                             | 604 (15.8)  | 624 (16.3)  |
| Basal insulin only                                     | 1454 (38.1) | 1440 (37.7) |
| Basal–bolus insulin (including bolus-only and pre-mix) | 1760 (46.1) | 1755 (46.0) |
| Antihypertensive therapy*                              |             |             |
| Beta-blockers                                          | 2210 (57.9) | 2190 (57.3) |
| Calcium channel blockers                               | 1214 (31.8) | 1244 (32.6) |
| Angiotensin-converting enzyme inhibitors               | 1831 (48.0) | 1796 (47.0) |
| Angiotensin receptor blockers                          | 1289 (33.8) | 1266 (33.2) |
| Others                                                 | 402 (10.5)  | 375 (9.8)   |
| Diuretics*                                             |             |             |
| Loop diuretics                                         | 856 (22.4)  | 882 (23.1)  |
| Thiazides                                              | 887 (23.2)  | 855 (22.4)  |
| Others                                                 | 537 (14.1)  | 534 (14.0)  |

|                                                    |                              |                              |
|----------------------------------------------------|------------------------------|------------------------------|
| Lipid-modifying medications*                       |                              |                              |
| Statins                                            | 3020 (79.1)                  | 2982 (78.1)                  |
| Fibrates                                           | 425 (11.1)                   | 426 (11.2)                   |
| Ezetimibe                                          | 175 (4.6)                    | 171 (4.5)                    |
| Others                                             | 131 (3.4)                    | 137 (3.6)                    |
| Platelet aggregation inhibitors*                   |                              |                              |
| Acetylsalicylic acid                               | 2501 (65.5)                  | 2491 (65.2)                  |
| Others                                             | 910 (23.8)                   | 887 (23.2)                   |
| Anti-thrombotic medication*                        | 308 (8.1)                    | 289 (7.6)                    |
| Body weight (lb)                                   | 211.8 ± 50.5                 | 211.9 ± 50.4                 |
| Body weight [kg]                                   | [96.1 ± 22.9]                | [96.1 ± 22.9]                |
| Body mass index (kg/m <sup>2</sup> )               | 33.6 ± 6.8                   | 33.6 ± 6.8                   |
| Blood pressure (systolic/diastolic, mmHg)          | 135.4 ± 18.0/<br>76.1 ± 10.3 | 135.7 ± 18.1/<br>76.2 ± 10.4 |
| Pulse (beats/minute)                               | 72.9 ± 11.4                  | 73.3 ± 11.3                  |
| Glycated hemoglobin (%)                            | 8.4 ± 1.6                    | 8.4 ± 1.7                    |
| [mmol/mol]                                         | [68.7 ± 17.8]                | [68.5 ± 18.3]                |
| Fasting plasma glucose (mg/dL)                     | 169.8 ± 70.3                 | 173.5 ± 70.7                 |
| [mmol/L]                                           | [9.4 ± 3.9]                  | [9.6 ± 3.9]                  |
| eGFR (mL/min/1.73m <sup>2</sup> ) based on CKD-EPI | 68.1 ± 21.5                  | 67.8 ± 21.6                  |
| Total cholesterol (mg/dL)                          | 164.0 ± 47.2                 | 166.2 ± 47.0                 |
| [mmol/L]                                           | [4.3 ± 1.2]                  | [4.3 ± 1.2]                  |
| Low-density lipoprotein cholesterol (mg/dL)        | 84.8 ± 36.5                  | 86.1 ± 36.5                  |
| [mmol/L]                                           | [2.2 ± 0.9]                  | [2.2 ± 1.0]                  |
| High-density lipoprotein cholesterol (mg/dL)       | 44.2 ± 12.9                  | 44.6 ± 12.8                  |



|                       |               |               |
|-----------------------|---------------|---------------|
| [mmol/L]              | [1.2 ± 0.3]   | [1.2 ± 0.3]   |
| Triglycerides (mg/dL) | 183.0 ± 150.6 | 187.2 ± 169.3 |
| [mmol/L]              | [2.1 ± 1.7]   | [2.1 ± 1.9]   |

Full analysis set (all randomized patients); Data listed are number (proportion [%]) or mean ± standard deviation. Percentage refers to the proportion of patients on degludec or glargine treatment.

\*Nine patients have missing initiation drug date; they are assumed to be on treatment at baseline.

†Patients with missing age information or age <50 years, but who fulfilled at least one of the inclusion criteria for established cardiovascular/chronic kidney disease were included.

‡Patients with missing age information and who only fulfilled the inclusion criteria for cardiovascular disease risk factors were not included.

CKD-EPI, chronic kidney disease epidemiology collaboration formula; eGFR, estimated glomerular filtration rate.

**Table S3:** Concomitant antihyperglycemic and cardiovascular medications started after baseline and prevalent use at end of study

|                                                      | After baseline |      |          |      | At end of study |      |          |      |
|------------------------------------------------------|----------------|------|----------|------|-----------------|------|----------|------|
|                                                      | Degludec       |      | Glargine |      | Degludec        |      | Glargine |      |
|                                                      | n              | %    | n        | %    | n               | %    | n        | %    |
| <b>Antihyperglycemic medications</b>                 |                |      |          |      |                 |      |          |      |
| Metformin                                            | 117            | 3.1  | 115      | 3.0  | 2173            | 56.9 | 2155     | 56.4 |
| Sulfonylureas                                        | 84             | 2.2  | 82       | 2.1  | 914             | 23.9 | 934      | 24.5 |
| Alpha-glucosidase inhibitors                         | 25             | 0.7  | 22       | 0.6  | 60              | 1.6  | 62       | 1.6  |
| Thiazolidinediones                                   | 50             | 1.3  | 40       | 1.0  | 137             | 3.6  | 124      | 3.2  |
| Dipeptidyl peptidase-4 inhibitors                    | 122            | 3.2  | 136      | 3.6  | 432             | 11.3 | 466      | 12.2 |
| Glucagon-like peptide-1 receptor agonists            | 151            | 4.0  | 118      | 3.1  | 322             | 8.4  | 306      | 8.0  |
| Sodium-dependent glucose co-transporter-2 inhibitors | 163            | 4.3  | 153      | 4.0  | 181             | 4.7  | 177      | 4.6  |
| Others                                               | 28             | 0.7  | 19       | 0.5  | 53              | 1.4  | 59       | 1.5  |
| <b>Cardiovascular medications</b>                    |                |      |          |      |                 |      |          |      |
| Antihypertensive therapies                           | 731            | 19.1 | 734      | 19.2 | 3546            | 92.9 | 3543     | 92.8 |
| Beta-blockers                                        | 205            | 5.4  | 205      | 5.4  | 2275            | 59.6 | 2263     | 59.3 |
| Calcium channel blockers                             | 266            | 7.0  | 273      | 7.1  | 1307            | 34.2 | 1305     | 34.2 |
| Angiotensin-converting enzyme inhibitors             | 135            | 3.5  | 151      | 4.0  | 1738            | 45.5 | 1706     | 44.7 |
| Angiotensin receptor blockers                        | 159            | 4.2  | 168      | 4.4  | 1322            | 34.6 | 1307     | 34.2 |
| Others                                               | 181            | 4.7  | 161      | 4.2  | 478             | 12.5 | 437      | 11.4 |
| Diuretics                                            | 560            | 14.7 | 505      | 13.2 | 2013            | 52.7 | 2023     | 53.0 |
| Loop diuretics                                       | 292            | 7.6  | 287      | 7.5  | 1011            | 26.5 | 1031     | 27.0 |
| Thiazides                                            | 155            | 4.1  | 131      | 3.4  | 879             | 23.0 | 841      | 22.0 |
| Others                                               | 242            | 6.3  | 191      | 5.0  | 617             | 16.2 | 589      | 15.4 |
| Lipid-lowering drugs                                 | 284            | 7.4  | 289      | 7.6  | 3175            | 83.2 | 3141     | 82.2 |
| Statins                                              | 181            | 4.7  | 181      | 4.7  | 3052            | 79.9 | 3008     | 78.8 |
| Fibrates                                             | 56             | 1.5  | 57       | 1.5  | 417             | 10.9 | 422      | 11.1 |
| Ezetimibe                                            | 33             | 0.9  | 34       | 0.9  | 174             | 4.6  | 187      | 4.9  |
| Others                                               | 30             | 0.8  | 36       | 0.9  | 125             | 3.3  | 124      | 3.2  |
| Platelet aggregation inhibitors                      | 351            | 9.2  | 334      | 8.7  | 2817            | 73.8 | 2753     | 72.1 |
| Acetylsalicylic acid                                 | 163            | 4.3  | 149      | 3.9  | 2554            | 66.9 | 2490     | 65.2 |
| Others                                               | 238            | 6.2  | 227      | 5.9  | 987             | 25.9 | 948      | 24.8 |
| Anti-thrombotic medications                          | 330            | 8.6  | 355      | 9.3  | 381             | 10.0 | 362      | 9.5  |

Full analysis set (all randomized patients). n, number of patients; %, proportion of patients.

**Table S4:** Cardiovascular risk factors

| <b>Change from baseline to month 24</b>                         | <b>Degludec</b>  | <b>Glargine</b>   |
|-----------------------------------------------------------------|------------------|-------------------|
| Body weight, lb<br>[kg]                                         | 4.9<br>[2.2]     | 4.2<br>[1.9]      |
| Body mass index, kg/m <sup>2</sup>                              | 0.8              | 0.7               |
| Systolic/diastolic blood pressure, mmHg                         | -1.1/-0.8        | -0.0/-0.6         |
| Pulse, beats/minute                                             | -0.8             | -0.7              |
| Estimated glomerular filtration rate, ml/min/1.73m <sup>2</sup> | -2.4             | -2.6              |
| Total cholesterol, mg/dL<br>[mmol/L]                            | -3.86<br>[-0.10] | -3.66<br>[-0.09]  |
| High-density lipoprotein cholesterol, mg/dL<br>[mmol/L]         | -1.23<br>[-0.03] | -0.73<br>[-0.02]  |
| Low-density lipoprotein cholesterol, mg/dL<br>[mmol/L]          | -0.98<br>[-0.03] | -1.09<br>[-0.03]  |
| Triglycerides, mg/dL<br>[mmol/L]                                | -9.22<br>[-0.10] | -12.21<br>[-0.14] |

Full analysis set (all randomized patients). Values are mean.

**Table S5:** Malignant neoplasms by primary organ site

|                                        | Degludec |     | Glargine |     |
|----------------------------------------|----------|-----|----------|-----|
|                                        | n        | %   | n        | %   |
| Number of patients                     | 3818     |     | 3819     |     |
| PYO                                    | 7568     |     | 7558     |     |
| Number of patients with events         | 93       | 2.4 | 99       | 2.6 |
| Gastrointestinal other than colorectal | 16       | 0.4 | 16       | 0.4 |
| Genitourinary other than prostate      | 13       | 0.3 | 13       | 0.3 |
| Lung and pleura                        | 13       | 0.3 | 11       | 0.3 |
| Colorectal                             | 7        | 0.2 | 12       | 0.3 |
| Prostate                               | 11       | 0.3 | 10       | 0.3 |
| Breast                                 | 9        | 0.2 | 10       | 0.3 |
| Hematological malignancies             | 9        | 0.2 | 7        | 0.2 |
| Gynecologic                            | 8        | 0.2 | 5        | 0.1 |
| Skin                                   | 5        | 0.1 | 6        | 0.2 |
| Head and neck                          | 4        | 0.1 | 3        | 0.1 |
| Musculoskeletal                        | 0        | 0.0 | 2        | 0.1 |
| Unknown                                | 0        | 0.0 | 4        | 0.1 |

Full analysis set (all randomized patients); neoplasms externally classified. Primary organ site was assessed by the external classifiers.

n, number of patients with events; PYO, patient-years of observation; %, proportion of patients with events.

**Table S6:** Serious adverse events by system organ class with frequencies  $\geq 1\%$

|                                                      | Degludec |      |      |       | Glargine |      |      |       |
|------------------------------------------------------|----------|------|------|-------|----------|------|------|-------|
|                                                      | n        | %    | E    | R     | n        | %    | E    | R     |
| All events                                           | 1473     | 38.6 | 3341 | 44.15 | 1517     | 39.7 | 3745 | 49.55 |
| Cardiac disorders                                    | 579      | 15.2 | 873  | 11.54 | 616      | 16.1 | 972  | 12.86 |
| Infections and infestations                          | 367      | 9.6  | 501  | 6.62  | 394      | 10.3 | 549  | 7.26  |
| Nervous system disorders                             | 233      | 6.1  | 282  | 3.73  | 269      | 7.0  | 345  | 4.56  |
| Gastrointestinal disorders                           | 150      | 3.9  | 178  | 2.35  | 148      | 3.9  | 186  | 2.46  |
| Metabolism and nutrition disorders                   | 149      | 3.9  | 183  | 2.42  | 137      | 3.6  | 183  | 2.42  |
| Renal and urinary disorders                          | 144      | 3.8  | 171  | 2.26  | 172      | 4.5  | 210  | 2.78  |
| Respiratory, thoracic and mediastinal disorders      | 148      | 3.9  | 194  | 2.56  | 172      | 4.5  | 241  | 3.19  |
| Injury, poisoning and procedural complications       | 130      | 3.4  | 165  | 2.18  | 132      | 3.5  | 170  | 2.25  |
| General disorders and administration-site conditions | 122      | 3.2  | 130  | 1.72  | 142      | 3.7  | 158  | 2.09  |
| Musculoskeletal and connective tissue disorders      | 118      | 3.1  | 134  | 1.77  | 118      | 3.1  | 134  | 1.77  |
| Neoplasms benign, malignant and unspecified*         | 109      | 2.9  | 116  | 1.53  | 109      | 2.9  | 119  | 1.57  |
| Hepatobiliary disorders                              | 38       | 1.0  | 39   | 0.52  | 32       | 0.8  | 38   | 0.50  |
| Psychiatric disorders                                | 34       | 0.9  | 42   | 0.56  | 38       | 1.0  | 46   | 0.61  |
| Blood and lymphatic system disorders                 | 29       | 0.8  | 31   | 0.41  | 57       | 1.5  | 68   | 0.90  |

Full analysis set (all randomized patients). \*Including cysts and polyps.

E, number of events; n, number of patients with events; R, rate of events per 100 patient-years of observation; %, proportion of patients with events.

**Table S7:** Serious adverse events by preferred term with frequencies  $\geq 1\%$

|                                       | Degludec |      |      |       | Glargine |      |      |       |
|---------------------------------------|----------|------|------|-------|----------|------|------|-------|
|                                       | n        | %    | E    | R     | n        | %    | E    | R     |
| Number of patients                    | 3818     |      |      |       | 3819     |      |      |       |
| PYO                                   | 7568     |      |      |       | 7558     |      |      |       |
| Number of patients with events        | 1473     | 38.6 | 3341 | 44.15 | 1517     | 39.7 | 3745 | 49.55 |
| Atrial fibrillation                   | 47       | 1.2  | 55   | 0.73  | 56       | 1.5  | 75   | 0.99  |
| Acute myocardial infarction           | 98       | 2.6  | 111  | 1.47  | 115      | 3.0  | 123  | 1.63  |
| Angina pectoris                       | 36       | 0.9  | 37   | 0.49  | 48       | 1.3  | 53   | 0.70  |
| Angina unstable                       | 87       | 2.3  | 94   | 1.24  | 79       | 2.1  | 93   | 1.23  |
| Coronary artery disease               | 80       | 2.1  | 85   | 1.12  | 89       | 2.3  | 91   | 1.20  |
| Myocardial infarction                 | 48       | 1.3  | 51   | 0.67  | 66       | 1.7  | 68   | 0.90  |
| Cardiac failure congestive            | 134      | 3.5  | 177  | 2.34  | 143      | 3.7  | 206  | 2.73  |
| Non-cardiac chest pain                | 47       | 1.2  | 48   | 0.63  | 54       | 1.4  | 63   | 0.83  |
| Cellulitis                            | 52       | 1.4  | 64   | 0.85  | 61       | 1.6  | 72   | 0.95  |
| Pneumonia                             | 90       | 2.4  | 99   | 1.31  | 90       | 2.4  | 102  | 1.35  |
| Fall                                  | 54       | 1.4  | 57   | 0.75  | 55       | 1.4  | 59   | 0.78  |
| Hypoglycemia                          | 64       | 1.7  | 77   | 1.02  | 49       | 1.3  | 66   | 0.87  |
| Ischemic stroke                       | 43       | 1.1  | 44   | 0.58  | 45       | 1.2  | 50   | 0.66  |
| Transient ischemic attack             | 28       | 0.7  | 29   | 0.38  | 42       | 1.1  | 44   | 0.58  |
| Acute kidney injury                   | 70       | 1.8  | 79   | 1.04  | 95       | 2.5  | 110  | 1.46  |
| Chronic obstructive pulmonary disease | 42       | 1.1  | 54   | 0.71  | 56       | 1.5  | 70   | 0.93  |

Full analysis set (all randomized patients); six and one of the reported hypoglycemic serious adverse events for degludec and glargine, respectively, were not categorized as severe hypoglycemia by the Event Adjudication Committee.

E, number of events; n, number of patients with events; PYO, patient-years of observation; R, rate of events per 100 patient-years of observation; %, proportion of patients with events.

**Table S8:** Critical symptoms of Event Adjudication Committee-confirmed severe hypoglycemic episodes by serious adverse event and preferred term

|                                              | Degludec |     |     |      | Glargine |     |     |      |
|----------------------------------------------|----------|-----|-----|------|----------|-----|-----|------|
|                                              | n        | %   | E   | R    | n        | %   | E   | R    |
| Number of patients                           | 3818     |     |     |      | 3819     |     |     |      |
| <b>All EAC-confirmed severe hypoglycemia</b> | 187      | 4.9 | 280 | 3.70 | 252      | 6.6 | 472 | 6.25 |
| Unconscious or in coma                       | 54       | 1.4 | 60  | 0.79 | 63       | 1.6 | 75  | 0.99 |
| Seizure                                      | 9        | 0.2 | 11  | 0.15 | 10       | 0.3 | 11  | 0.15 |
| <b>Non-SAE</b>                               |          |     |     |      |          |     |     |      |
| Unconscious or in coma                       | 21       | 0.6 | 22  | 0.29 | 26       | 0.7 | 30  | 0.40 |
| Seizure                                      | 2        | 0.1 | 2   | 0.03 | 4        | 0.1 | 4   | 0.05 |
| <b>SAE (any PT)</b>                          |          |     |     |      |          |     |     |      |
| Unconscious or in coma                       | 35       | 0.9 | 38  | 0.50 | 40       | 1.0 | 45  | 0.60 |
| Seizure                                      | 7        | 0.2 | 9   | 0.12 | 7        | 0.2 | 7   | 0.09 |
| <b>SAE of 'hypoglycemia' (PT)</b>            |          |     |     |      |          |     |     |      |
| Unconscious or in coma                       | 9        | 0.2 | 9   | 0.12 | 13       | 0.3 | 14  | 0.19 |
| Seizure                                      | 0        | 0.0 | 0   | 0.00 | 3        | 0.1 | 3   | 0.04 |

Of the 752 EAC-confirmed severe hypoglycemic episodes, 136 were reported as a serious adverse event with the preferred term hypoglycemia: 71 events (60 patients) in the degludec group and 65 events (49 patients) in the glargine group. Based on hypoglycemic symptoms, as assessed by the EAC, including the more critical symptoms of unconsciousness/coma and seizure, this subset of events did not differ between the two groups, nor from all the EAC-confirmed severe hypoglycemic episodes.

E, number of events; EAC, Event Adjudication Committee; n, number of patients with events; PT, preferred term; R, rate of events per 100 patient-years of exposure; SAE, serious adverse event; %, proportion of patients with events.
